# Supplementary material for: Reactivity of hydropersulfides toward the hydroxyl radical unraveled: disulfide bond cleavage, hydrogen atom transfer, and proton-coupled electron transfer
Source: Royal Society of Chemistry journal article supplement (doi:10.1039/c7cp07570g), 2018-01-01
Supplement: c7cp07570g1.pdf [file c7cp07570g1.pdf]

**Reactivity of hydropersulfides toward hydroxyl radical unraveled:  
disulfide bond cleavage, hydrogen atom transfer, and proton-coupled  
electron transfer**

Josep M. Anglada,<sup>1</sup> Ramon Crehuet,<sup>1</sup> Sarju Adhikari<sup>2</sup>, Joseph S. Francisco<sup>3</sup>, Yu Xia<sup>2,4</sup>

- 1) Institute of Advanced Chemistry of Catalonia IQAC-CSIC, Barcelona, Spain
- 2) Department of Chemistry, Purdue University, West Lafayette, Indiana, USA
- 3) Department of Chemistry, University of Nebraska-Lincoln, NE, USA
- 4) Department of Chemistry, Tsinghua University, Beijing, China

**(Supplementary Information)**

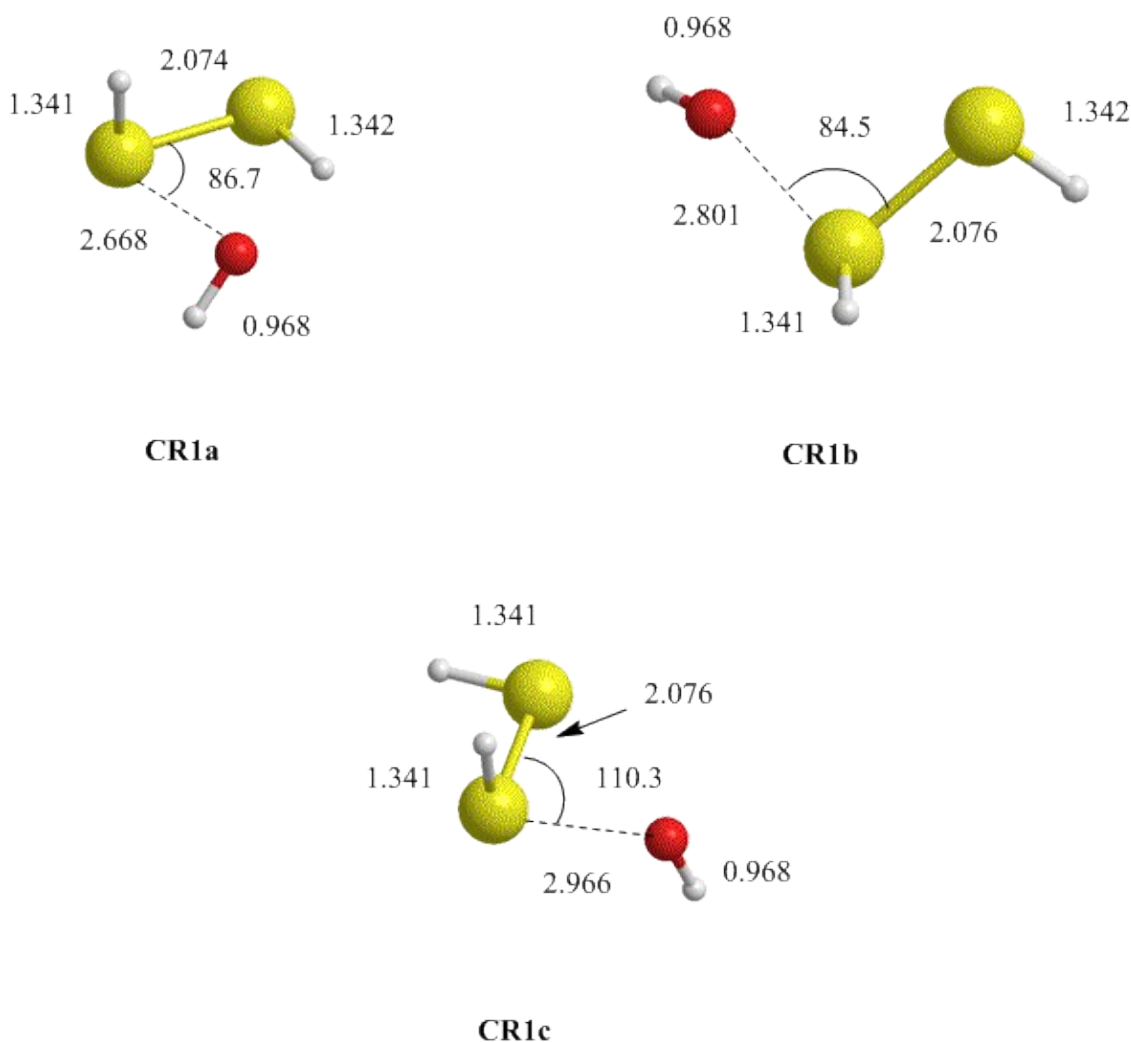

**Figure S1:** Main geometrical parameters (distances in Angstrom and angles in degree) of the pre-reactive complexes for the HSSH + OH reaction.

**Table S1** : Relative energies ( $\Delta(E+ZPE)$ ) and free energies ( $\Delta G(298K)$ ), values in kcal·mol<sup>-1</sup>, for the reaction between OH and RSSH, computed at CCSD(T)/aug-cc-pV(T+d)/QCISD/6-11+G(2df,2p) level of theory.

| <b>R =</b>                                | <b>H</b>         | <b>CH<sub>3</sub></b> | <b>NH<sub>2</sub></b> | <b>COOH</b>       | <b>CN</b>          | <b>NO<sub>2</sub></b> |
|-------------------------------------------|------------------|-----------------------|-----------------------|-------------------|--------------------|-----------------------|
| <b>HSSR + OH</b>                          | 0.00             | 0.00                  | 0.00                  | 0.00              | 0.00               | 0.00                  |
| <b>RSSH + OH → HSOH + SR (Reaction 1)</b> |                  |                       |                       |                   |                    |                       |
| <b>CRBTS1a</b>                            | -2.13<br>(3.39)  | -1.81<br>(3.88)       | -2.65<br>(4.12)       | -0.65<br>(4.83)   | -2.74<br>(2.85)    | -1.98<br>(3.54)       |
| <b>BTS1a</b>                              | -1.51<br>(6.51)  | -1.42<br>(6.65)       | 0.07<br>(8.01)        | -0.02<br>(8.05)   | -1.13<br>(6.91)    | -0.01<br>(8.18)       |
| <b>CPBTS1a</b>                            | -10.32<br>(2.25) | -9.07<br>(-1.24)      | -19.60<br>(-13.13)    | -9.17<br>(-1.47)  | -14.64<br>(-8.76)  | -7.59<br>(-0.08)      |
| <b>CRBTS1b</b>                            | -2.94<br>(3.99)  | -2.47<br>(3.99)       | -1.47<br>(5.04)       | -2.01<br>(3.43)   | -4.23<br>(2.36)    | -3.98<br>(2.74)       |
| <b>BTS1b</b>                              | -1.76<br>(6.28)  | -2.42<br>(5.75)       | -1.46<br>(6.59)       | -1.14<br>(6.85)   | -1.60<br>(6.34)    | -1.38<br>(6.88)       |
| <b>CPBTS1b</b>                            | -9.82<br>(-1.87) | -8.44<br>(-0.50)      | -19.62<br>(-13.18)    | -11.21<br>(-3.19) | -14.64<br>(-8.76)  | -10.88<br>(-3.11)     |
| <b>CRFTS1a</b>                            | -2.94<br>(3.99)  | -2.49<br>(3.86)       | -2.67<br>(4.05)       | -5.20<br>(1.60)   | -4.15<br>(2.68)    | -4.06<br>(3.71)       |
| <b>FTS1a</b>                              | 6.27<br>(14.56)  | 8.11<br>(16.47)       | 6.85<br>(15.59)       | 8.44<br>(17.28)   | 6.93<br>(14.98)    | 10.95<br>(19.47)      |
| <b>CPFTS1a</b>                            | -8.55<br>(-2.39) | -9.04<br>(-3.60)      | -19.35<br>(-13.32)    | -15.86<br>(-7.87) | -14.64<br>(-8.76)  | -7.61<br>(-0.11)      |
| <b>CRFTS1b</b>                            | -1.89<br>(4.22)  | -1.79<br>(3.89)       | -1.47<br>(5.04)       | -1.86<br>(4.37)   | -2.22<br>(4.68)    | -0.04<br>(6.61)       |
| <b>FTS1b</b>                              | 4.44<br>(12.75)  | 4.44<br>(12.73)       | 3.26<br>(11.75)       | 4.22<br>(12.66)   | 2.06<br>(10.64)    | 5.48<br>(14.01)       |
| <b>CPFTS1b</b>                            | -8.55<br>(-2.39) | -10.88<br>(-5.30)     | -22.31<br>(-15.42)    | -11.01<br>(-3.39) | -14.60<br>(-8.54)  | -7.59<br>(-0.12)      |
| <b>HSOH + SR</b>                          | -6.43<br>(-6.56) | -5.69<br>(-7.66)      | -15.11<br>(-17.20)    | -5.38<br>(-7.79)  | -11.80<br>(-12.65) | -2.20<br>(-4.70)      |
| <b>RSSH + OH → RSOH + SH (Reaction 2)</b> |                  |                       |                       |                   |                    |                       |
| <b>CRBTS2a</b>                            | -2.13<br>(3.39)  | -5.38<br>(1.97)       | -5.43<br>(1.97)       | -2.15<br>(4.38)   | -4.12<br>(2.24)    | -1.49<br>(4.80)       |
| <b>BTS2a</b>                              | -1.51<br>(6.51)  | -4.49<br>(3.88)       | -3.22<br>(4.94)       | 1.62<br>(9.97)    | 1.03<br>(9.37)     | 2.01<br>(10.12)       |
| <b>CPBTS2a</b>                            | -10.32<br>(2.25) | -13.64<br>(-5.79)     | -18.12<br>(-10.54)    | -10.42<br>(-4.85) | -11.23<br>(-5.22)  | -10.88<br>(-5.44)     |
| <b>CRBTS2b</b>                            | -2.94<br>(3.99)  | -6.65<br>(1.13)       | -6.45<br>(1.41)       | --                | -4.12<br>(2.24)    | -1.66<br>(4.82)       |
| <b>BTS2b</b>                              | -1.76<br>(6.28)  | -5.63<br>(2.82)       | -4.52<br>(3.81)       | --                | -0.25<br>(8.24)    | 0.97<br>(9.25)        |
| <b>CPBTS2b</b>                            | -9.82<br>(-1.87) | -11.97<br>(-5.21)     | -18.09<br>(-10.47)    | --                | -11.22<br>(-5.20)  | -10.90<br>(-5.55)     |
| <b>CRFTS2a</b>                            | -2.94<br>(3.99)  | -6.64<br>(1.15)       | -8.01<br>(0.03)       | -3.17<br>(3.79)   | -4.16<br>(2.64)    | (a)                   |
| <b>FTS2a</b>                              | 6.27<br>(14.56)  | 1.77<br>(10.21)       | -0.60<br>(7.91)       | 6.09<br>(14.81)   | 5.86<br>(14.50)    | (a)                   |
| <b>CPFTS2a</b>                            | -8.55            | -11.97                | -18.08                | -15.03            | -10.07             | (a)                   |

|                                                                                  |          |          |          |          |          |          |
|----------------------------------------------------------------------------------|----------|----------|----------|----------|----------|----------|
|                                                                                  | (-2.39)  | (-5.21)  | (-10.45) | (-7.78)  | (-5.53)  |          |
| <b>CRFTS2b</b>                                                                   | -1.89    | -5.39    | -6.92    | -2.14    | -4.12    | (a)      |
|                                                                                  | (4.22)   | (1.98)   | (0.92)   | (4.41)   | (2.24)   |          |
| <b>FTS2b</b>                                                                     | 4.44     | -0.34    | -1.02    | 5.05     | 4.12     | (a)      |
|                                                                                  | (12.75)  | (8.20)   | (7.87)   | (13.75)  | (12.76)  |          |
| <b>CPFTS2b</b>                                                                   | -8.55    | -16.63   | -21.28   | -10.78   | -10.12   | (a)      |
|                                                                                  | (-2.39)  | (-8.55)  | (-13.32) | (-5.27)  | (-5.81)  |          |
| <b>RSOH + SH</b>                                                                 | -6.43    | -8.14    | -13.17   | -9.40    | -8.44    | -10.08   |
|                                                                                  | (-6.56)  | (-8.36)  | (-13.39) | (-9.67)  | (-8.68)  | (-10.29) |
| <b>RSSH + OH → SSR + H<sub>2</sub>O (Reaction 3)</b>                             |          |          |          |          |          |          |
| <b>CRHTS3a</b>                                                                   | -2.94    | -6.66    | 8.00     | -5.18    | -4.16    | -4.06    |
|                                                                                  | (3.99)   | (1.10)   | (0.04)   | (1.71)   | (2.64)   | (3.71)   |
| <b>HTS3a</b>                                                                     | -1.40    | -2.18    | -2.14    | -1.78    | -1.56    | -1.84    |
|                                                                                  | (5.82)   | (5.20)   | (5.21)   | (5.73)   | (5.95)   | (5.65)   |
| <b>CPHTS3a</b>                                                                   | -45.37   | -49.13   | -51.03   | -41.77   | -45.07   | -48.70   |
|                                                                                  | (-40.26) | (-42.88) | (-44.08) | (-39.46) | (-38.97) | (-43.11) |
| <b>CRHTS3b</b>                                                                   | 2.13     | -2.48    | -3.35    | -5.18    | -4.16    | -4.06    |
|                                                                                  | (3.39)   | (3.88)   | (3.41)   | (1.71)   | (2.64)   | (3.71)   |
| <b>HTS3b</b>                                                                     | -1.61    | -2.07    | -2.34    | -3.65    | -2.38    | -3.81    |
|                                                                                  | (5.64)   | (5.19)   | (4.92)   | (3.91)   | (5.17)   | (4.18)   |
| <b>CPHTS3b</b>                                                                   | -47.07   | 49.13    | -51.04   | -41.77   | -45.07   | -48.70   |
|                                                                                  | (-40.36) | (-42.88) | (-44.11) | (-39.46) | (-38.97) | (-43.11) |
| <b>CRPTS3a</b>                                                                   | -2.94    | -6.66    | -6.44    | --       | --       | --       |
|                                                                                  | (3.99)   | (1.10)   | (1.44)   |          |          |          |
| <b>PTS3a</b>                                                                     | 2.53     | -2.71    | -1.63    | --       | --       | --       |
|                                                                                  | (10.54)  | (6.09)   | (7.07)   |          |          |          |
| <b>CPPTS3a</b>                                                                   | -47.07   | -49.13   | -49.83   | --       | --       | --       |
|                                                                                  | (-40.36) | (-42.88) | (-42.95) |          |          |          |
| <b>CRPTS3b</b>                                                                   | --       | -6.66    | --       | --       | --       | --       |
|                                                                                  |          | (1.10)   |          |          |          |          |
| <b>PTS3b</b>                                                                     | --       | -0.55    | --       | --       | --       | --       |
|                                                                                  |          | (7.84)   |          |          |          |          |
| <b>CPPTS3b</b>                                                                   | --       | -49.13   | ----     | --       | --       | --       |
|                                                                                  |          | (-42.88) |          |          |          |          |
| <b>NO<sub>2</sub>SSH + OH → HSSOH + NO<sub>2</sub> (Reaction 10)</b>             |          |          |          |          |          |          |
| <b>CRFTS10b</b>                                                                  | --       | --       | --       | --       | --       | -3.20    |
|                                                                                  |          |          |          |          |          | (2.47)   |
| <b>FTS10b</b>                                                                    | --       | --       | --       | --       | --       | 0.85     |
|                                                                                  |          |          |          |          |          | (9.19)   |
| <b>CPFTS10b</b>                                                                  | --       | --       | --       | --       | --       | -36.38   |
|                                                                                  |          |          |          |          |          | (-32.40) |
| <b>CRFTS10a</b>                                                                  | --       | --       | --       | --       | --       | -1.64    |
|                                                                                  |          |          |          |          |          | (4.89)   |
| <b>FTS10a</b>                                                                    | --       | --       | --       | --       | --       | 0.32     |
|                                                                                  |          |          |          |          |          | (8.56)   |
| <b>CPFTS10a</b>                                                                  | --       | --       | --       | --       | --       | -35.37   |
|                                                                                  |          |          |          |          |          | (-31.84) |
| <b>CH<sub>3</sub>SSH + OH → CH<sub>2</sub>SSH + H<sub>2</sub>O (Reaction 11)</b> |          |          |          |          |          |          |
| <b>CRHTS11</b>                                                                   | -        | -2.69    | -        | -        | -        | -        |

|                                                                 |   |          |   |         |   |   |
|-----------------------------------------------------------------|---|----------|---|---------|---|---|
|                                                                 |   | (4.03)   |   |         |   |   |
| <b>HTS11a</b>                                                   | - | 0.02     | - | -       | - | - |
|                                                                 |   | (7.71)   |   |         |   |   |
| <b>HTS11b</b>                                                   | - | 0.76     | - | -       | - | - |
|                                                                 |   | (8.03)   |   |         |   |   |
| <b>CPHTS11</b>                                                  | - | -23.50   | - | -       | - | - |
|                                                                 |   | (-18.92) |   |         |   |   |
| <b>CH<sub>2</sub>SSH + H<sub>2</sub>O</b>                       | - | -21.72   | - | -       | - | - |
|                                                                 |   | (-22.62) |   |         |   |   |
| <b>(COOH)SSH + OH → (COO)SSH + H<sub>2</sub>O (Reaction 12)</b> |   |          |   |         |   |   |
| <b>CRPTS12</b>                                                  | - | -        | - | -7.12   | - | - |
|                                                                 |   |          |   | (0.76)  |   |   |
| <b>PTS12a</b>                                                   | - | -        | - | 1.63    | - | - |
|                                                                 |   |          |   | (10.51) |   |   |
| <b>PTS12b</b>                                                   | - | -        | - | 1.77    | - | - |
|                                                                 |   |          |   | (10.64) |   |   |
| <b>CPPTS12</b>                                                  | - | -        | - | -8.84   | - | - |
|                                                                 |   |          |   | (-3.88) |   |   |

a) Correspond to reaction 10

**Table S2:** Rate constants (in  $M^{-1} \cdot s^{-1}$ ) at different temperatures (in kelvin), and branching ratios ( $\Gamma$ , in %).

**OH + HSSH**

| T      | k total  | Kbackside | Kfrontside | Khat     | Kpcet    | $\Gamma_{\text{reaction2}}$ | $\Gamma_{\text{reaction3}}$ |
|--------|----------|-----------|------------|----------|----------|-----------------------------|-----------------------------|
| 220.00 | 1.09e+11 | 1.50e+10  | 3.24e+04   | 9.28e+10 | 1.31e+09 | 0.14                        | 0.86                        |
| 230.00 | 9.48e+10 | 1.27e+10  | 4.41e+04   | 8.10e+10 | 1.02e+09 | 0.13                        | 0.87                        |
| 240.00 | 8.36e+10 | 1.09e+10  | 5.86e+04   | 7.19e+10 | 8.21e+08 | 0.13                        | 0.87                        |
| 250.00 | 7.48e+10 | 9.48e+09  | 7.62e+04   | 6.46e+10 | 6.77e+08 | 0.13                        | 0.87                        |
| 260.00 | 5.76e+10 | 8.36e+09  | 9.75e+04   | 4.87e+10 | 5.71e+08 | 0.15                        | 0.85                        |
| 270.00 | 5.26e+10 | 7.46e+09  | 1.23e+05   | 4.47e+10 | 4.90e+08 | 0.14                        | 0.86                        |
| 280.00 | 4.85e+10 | 6.72e+09  | 1.52e+05   | 4.13e+10 | 4.29e+08 | 0.14                        | 0.86                        |
| 290.00 | 4.49e+10 | 6.11e+09  | 1.86e+05   | 3.84e+10 | 3.80e+08 | 0.14                        | 0.86                        |
| 298.00 | 3.59e+10 | 5.70e+09  | 2.17e+05   | 2.99e+10 | 3.49e+08 | 0.16                        | 0.84                        |
| 300.00 | 3.54e+10 | 5.60e+09  | 2.26e+05   | 2.94e+10 | 3.43e+08 | 0.16                        | 0.84                        |
| 310.00 | 3.33e+10 | 5.17e+09  | 2.70e+05   | 2.78e+10 | 3.12e+08 | 0.16                        | 0.84                        |
| 320.00 | 3.15e+10 | 4.82e+09  | 3.21e+05   | 2.64e+10 | 2.88e+08 | 0.15                        | 0.85                        |

**OH + CH<sub>3</sub>SSH**

| T      | $\Gamma_{\text{reaction 1}}$ | $\Gamma_{\text{reaction 2}}$ | $\Gamma_{\text{reaction 9}}$ | $\Gamma_{\text{reaction 3}}$ |
|--------|------------------------------|------------------------------|------------------------------|------------------------------|
| 220.00 | 0.00                         | 0.70                         | 0.00                         | 0.30                         |
| 230.00 | 0.00                         | 0.71                         | 0.00                         | 0.29                         |
| 240.00 | 0.00                         | 0.72                         | 0.00                         | 0.27                         |
| 250.00 | 0.00                         | 0.73                         | 0.00                         | 0.26                         |
| 260.00 | 0.00                         | 0.74                         | 0.00                         | 0.26                         |
| 270.00 | 0.00                         | 0.74                         | 0.00                         | 0.25                         |
| 280.00 | 0.01                         | 0.75                         | 0.00                         | 0.25                         |
| 290.00 | 0.01                         | 0.75                         | 0.00                         | 0.24                         |
| 298.00 | 0.01                         | 0.75                         | 0.00                         | 0.24                         |
| 300.00 | 0.01                         | 0.75                         | 0.00                         | 0.24                         |
| 310.00 | 0.01                         | 0.75                         | 0.00                         | 0.24                         |
| 320.00 | 0.01                         | 0.75                         | 0.01                         | 0.23                         |

**OH + CH<sub>3</sub>SSH**

| T      | K backs. react1 | K fronts react 1 | Kbacks react2 | K fronts react2 | K react9 | K pcet react3 | K hat react3 |
|--------|-----------------|------------------|---------------|-----------------|----------|---------------|--------------|
| 230.00 | 9.40e+10        | 2.21e+04         | 4.98e+13      | 3.58e+09        | 2.05e+10 | 1.97e+13      | 6.25e+11     |
| 240.00 | 7.72e+10        | 3.32e+04         | 3.03e+13      | 3.22e+09        | 1.90e+10 | 1.13e+13      | 5.22e+11     |

|        |          |          |          |          |          |          |          |
|--------|----------|----------|----------|----------|----------|----------|----------|
| 250.00 | 6.46e+10 | 4.87e+04 | 1.92e+13 | 2.92e+09 | 1.80e+10 | 6.79e+12 | 4.46e+11 |
| 260.00 | 5.49e+10 | 6.95e+04 | 1.26e+13 | 2.67e+09 | 1.71e+10 | 4.28e+12 | 3.86e+11 |
| 270.00 | 4.74e+10 | 9.68e+04 | 8.61e+12 | 2.45e+09 | 1.65e+10 | 2.80e+12 | 3.39e+11 |
| 280.00 | 4.15e+10 | 1.32e+05 | 6.04e+12 | 2.29e+09 | 1.60e+10 | 1.90e+12 | 3.01e+11 |
| 290.00 | 3.67e+10 | 1.76e+05 | 4.36e+12 | 2.14e+09 | 1.57e+10 | 1.33e+12 | 2.70e+11 |
| 298.00 | 3.36e+10 | 2.19e+05 | 3.41e+12 | 2.04e+09 | 1.55e+10 | 1.02e+12 | 2.50e+11 |
| 300.00 | 3.29e+10 | 2.31e+05 | 3.22e+12 | 2.01e+09 | 1.54e+10 | 9.55e+11 | 2.45e+11 |
| 310.00 | 2.97e+10 | 2.98e+05 | 2.43e+12 | 1.91e+09 | 1.53e+10 | 7.04e+11 | 2.25e+11 |
| 320.00 | 2.71e+10 | 3.79e+05 | 1.87e+12 | 1.81e+09 | 1.52e+10 | 5.32e+11 | 2.08e+11 |

**OH + NH<sub>2</sub>SSH**

| T      | Γreact1 | Γreact2 | Γreact3 |
|--------|---------|---------|---------|
| 220.00 | 0.00    | 0.87    | 0.13    |
| 230.00 | 0.00    | 0.87    | 0.13    |
| 240.00 | 0.00    | 0.87    | 0.13    |
| 250.00 | 0.00    | 0.86    | 0.13    |
| 260.00 | 0.00    | 0.85    | 0.14    |
| 270.00 | 0.00    | 0.86    | 0.13    |

|        |      |      |      |
|--------|------|------|------|
| 280.00 | 0.01 | 0.85 | 0.14 |
| 290.00 | 0.01 | 0.84 | 0.15 |
| 298.00 | 0.01 | 0.83 | 0.16 |
| 300.00 | 0.01 | 0.83 | 0.16 |
| 310.00 | 0.01 | 0.82 | 0.18 |
| 320.00 | 0.01 | 0.80 | 0.19 |

**OH + NH<sub>2</sub>SSH**

| T      | Kbsacks react1 | K fronrts react1 | Kbacks react 2 | K fronts react2 | K pcet react3 | K hat react3 |
|--------|----------------|------------------|----------------|-----------------|---------------|--------------|
| 220.00 | 9.03e+09       | 9.71e+05         | 6.23e+12       | 1.26e+09        | 6.35e+11      | 2.64e+11     |
| 230.00 | 8.03e+09       | 1.34e+06         | 4.07e+12       | 1.15e+09        | 3.66e+11      | 2.20e+11     |
| 240.00 | 7.24e+09       | 1.79e+06         | 2.77e+12       | 1.07e+09        | 2.23e+11      | 1.86e+11     |
| 250.00 | 6.60e+09       | 2.37e+06         | 1.95e+12       | 1.00e+09        | 1.43e+11      | 1.61e+11     |
| 260.00 | 6.07e+09       | 3.06e+06         | 1.42e+12       | 9.41e+08        | 9.55e+10      | 1.41e+11     |
| 270.00 | 5.65e+09       | 3.88e+06         | 1.06e+12       | 8.95e+08        | 6.65e+10      | 9.90e+10     |
| 280.00 | 5.29e+09       | 4.85e+06         | 8.11e+11       | 8.54e+08        | 4.80e+10      | 8.84e+10     |
| 290.00 | 4.99e+09       | 5.99e+06         | 6.33e+11       | 8.18e+08        | 3.56e+10      | 7.99e+10     |
| 298.00 | 4.79e+09       | 7.02e+06         | 5.26e+11       | 7.94e+08        | 2.86e+10      | 7.40e+10     |
| 300.00 | 4.74e+09       | 7.30e+06         | 5.06e+11       | 7.89e+08        | 2.71e+10      | 7.27e+10     |
| 310.00 | 4.52e+09       | 8.80e+06         | 4.09e+11       | 7.65e+08        | 2.12e+10      | 6.69e+10     |



|        |          |          |          |          |          |          |
|--------|----------|----------|----------|----------|----------|----------|
| 320.00 | 4.34e+09 | 1.05e+07 | 3.37e+11 | 7.44e+08 | 1.70e+10 | 6.19e+10 |
|--------|----------|----------|----------|----------|----------|----------|

**OH + (COOH)SSH**

| T      | Гreact1 | Гreact 2 | Гreact3 | Гreact 12 |
|--------|---------|----------|---------|-----------|
| 220.00 | 0.00    | 0.00     | 1.00    | 0.00      |
| 230.00 | 0.00    | 0.00     | 1.00    | 0.00      |
| 240.00 | 0.00    | 0.00     | 1.00    | 0.00      |
| 250.00 | 0.00    | 0.00     | 1.00    | 0.00      |
| 260.00 | 0.00    | 0.00     | 1.00    | 0.00      |
| 270.00 | 0.00    | 0.00     | 1.00    | 0.00      |
| 280.00 | 0.00    | 0.00     | 0.99    | 0.00      |
| 290.00 | 0.01    | 0.00     | 0.99    | 0.00      |
| 298.00 | 0.01    | 0.00     | 0.99    | 0.00      |
| 300.00 | 0.01    | 0.00     | 0.99    | 0.00      |
| 310.00 | 0.01    | 0.00     | 0.99    | 0.00      |
| 320.00 | 0.01    | 0.00     | 0.99    | 0.00      |

**OH + (COOH)SSH**

| T      | k backs react1 | K fronts react1 | K backs react2 | K fronts react2 | K react3 | K pcet react 12 |
|--------|----------------|-----------------|----------------|-----------------|----------|-----------------|
| 220.00 | 2.51e+09       | 2.58e+03        | 1.77e+06       | 5.53e+02        | 4.37e+12 | 3.91e+09        |
| 230.00 | 2.30e+09       | 4.00e+03        | 2.12e+06       | 9.11e+02        | 2.68e+12 | 2.67e+09        |
| 240.00 | 2.14e+09       | 6.01e+03        | 2.51e+06       | 1.45e+03        | 1.72e+12 | 1.92e+09        |
| 250.00 | 2.00e+09       | 8.75e+03        | 2.93e+06       | 2.23e+03        | 1.15e+12 | 1.43e+09        |
| 260.00 | 1.89e+09       | 1.24e+04        | 3.40e+06       | 3.33e+03        | 7.98e+11 | 1.10e+09        |
| 270.00 | 1.79e+09       | 1.71e+04        | 3.89e+06       | 4.82e+03        | 5.70e+11 | 8.78e+08        |
| 280.00 | 1.71e+09       | 2.31e+04        | 4.45e+06       | 6.81e+03        | 4.20e+11 | 7.18e+08        |
| 290.00 | 1.65e+09       | 3.06e+04        | 5.03e+06       | 9.43e+03        | 3.11e+11 | 5.99e+08        |
| 298.00 | 1.60e+09       | 3.80e+04        | 5.52e+06       | 1.20e+04        | 2.51e+11 | 5.27e+08        |
| 300.00 | 1.59e+09       | 4.00e+04        | 5.65e+06       | 1.28e+04        | 2.38e+11 | 5.10e+08        |
| 310.00 | 1.54e+09       | 5.11e+04        | 6.32e+06       | 1.70e+04        | 1.87e+11 | 4.43e+08        |
| 320.00 | 1.51e+09       | 6.47e+04        | 6.99e+06       | 2.23e+04        | 1.49e+11 | 3.91e+08        |

**OH + CNSSH**

| T      | $\Gamma_{\text{reaction1}}$ | $\Gamma_{\text{reaction2}}$ | $\Gamma_{\text{reaction3}}$ |
|--------|-----------------------------|-----------------------------|-----------------------------|
| 220.00 | 0.05                        | 0.00                        | 0.95                        |
| 230.00 | 0.06                        | 0.00                        | 0.94                        |
| 240.00 | 0.06                        | 0.00                        | 0.94                        |

|        |      |      |      |
|--------|------|------|------|
| 250.00 | 0.06 | 0.00 | 0.93 |
| 260.00 | 0.07 | 0.00 | 0.93 |
| 270.00 | 0.07 | 0.00 | 0.92 |
| 280.00 | 0.08 | 0.00 | 0.92 |
| 290.00 | 0.08 | 0.00 | 0.91 |
| 298.00 | 0.09 | 0.00 | 0.91 |
| 300.00 | 0.09 | 0.00 | 0.91 |
| 310.00 | 0.09 | 0.00 | 0.91 |
| 320.00 | 0.09 | 0.00 | 0.90 |

**OH + CNSSH**

| T      | K backs react1 | k backs react2 | k react3 |
|--------|----------------|----------------|----------|
| 220.00 | 6.63e+09       | 1.22e+08       | 1.25e+11 |
| 230.00 | 5.86e+09       | 1.22e+08       | 9.97e+10 |
| 240.00 | 5.23e+09       | 1.22e+08       | 8.16e+10 |
| 250.00 | 4.74e+09       | 1.22e+08       | 6.81e+10 |
| 260.00 | 4.32e+09       | 1.23e+08       | 5.79e+10 |
| 270.00 | 3.98e+09       | 1.25e+08       | 4.99e+10 |
| 280.00 | 3.70e+09       | 1.26e+08       | 4.36e+10 |

|        |          |          |          |
|--------|----------|----------|----------|
| 290.00 | 3.46e+09 | 1.28e+08 | 3.85e+10 |
| 298.00 | 3.29e+09 | 1.30e+08 | 3.52e+10 |
| 300.00 | 3.26e+09 | 1.30e+08 | 3.45e+10 |
| 310.00 | 3.08e+09 | 1.33e+08 | 3.11e+10 |
| 320.00 | 2.93e+09 | 1.35e+08 | 2.83e+10 |

**OH + NO<sub>2</sub>SSH**

| T      | Γreaction1 | Γreaction2 | Γreaction3 | Γreaction8 |
|--------|------------|------------|------------|------------|
| 220.00 | 0.01       | 0.00       | 0.99       | 0.00       |
| 230.00 | 0.01       | 0.00       | 0.98       | 0.00       |
| 240.00 | 0.02       | 0.00       | 0.98       | 0.00       |
| 250.00 | 0.02       | 0.00       | 0.98       | 0.00       |
| 260.00 | 0.02       | 0.00       | 0.97       | 0.00       |
| 270.00 | 0.03       | 0.00       | 0.97       | 0.00       |
| 280.00 | 0.04       | 0.00       | 0.96       | 0.00       |
| 290.00 | 0.04       | 0.00       | 0.95       | 0.00       |
| 298.00 | 0.05       | 0.00       | 0.95       | 0.00       |
| 300.00 | 0.05       | 0.00       | 0.95       | 0.00       |

|        |      |      |      |      |
|--------|------|------|------|------|
| 310.00 | 0.05 | 0.00 | 0.94 | 0.01 |
| 320.00 | 0.06 | 0.00 | 0.93 | 0.01 |

### OH + NO<sub>2</sub>SSH

| T      | Kbacks react1 | K fronts react1 | K backs react2 | K fronts react2 | K react3 |
|--------|---------------|-----------------|----------------|-----------------|----------|
| 220.00 | 4.67e+09      | 4.85e+02        | 2.48e+07       | 1.40e+08        | 3.98e+11 |
| 230.00 | 4.15e+09      | 8.43e+02        | 2.81e+07       | 1.49e+08        | 2.82e+11 |
| 240.00 | 3.73e+09      | 1.39e+03        | 3.17e+07       | 1.58e+08        | 2.07e+11 |
| 250.00 | 3.38e+09      | 2.23e+03        | 3.54e+07       | 1.67e+08        | 1.57e+11 |
| 260.00 | 3.11e+09      | 3.44e+03        | 3.95e+07       | 1.77e+08        | 1.22e+11 |
| 270.00 | 2.88e+09      | 5.15e+03        | 4.39e+07       | 1.86e+08        | 8.59e+10 |
| 280.00 | 2.69e+09      | 7.47e+03        | 4.84e+07       | 1.97e+08        | 6.91e+10 |
| 290.00 | 2.53e+09      | 1.06e+04        | 5.33e+07       | 2.06e+08        | 5.66e+10 |
| 298.00 | 2.42e+09      | 1.39e+04        | 5.73e+07       | 2.15e+08        | 4.89e+10 |
| 300.00 | 2.40e+09      | 1.48e+04        | 5.83e+07       | 2.16e+08        | 4.72e+10 |
| 310.00 | 2.28e+09      | 2.02e+04        | 6.38e+07       | 2.28e+08        | 4.01e+10 |
| 320.00 | 2.19e+09      | 2.70e+04        | 6.93e+07       | 2.38e+08        | 3.45e+10 |

**Table S3:** Main topological parameters (density  $\rho$  and laplacian of the density  $\nabla^2\rho$ , in a.u.) of selected transition states in the attack of the OH radical to the S atoms of the HSSR compounds.

| Reaction                      | Property       | Attack to S1 |         |           |         | Attack to S2 |         |           |         |
|-------------------------------|----------------|--------------|---------|-----------|---------|--------------|---------|-----------|---------|
|                               |                | backside     |         | frontside |         | backside     |         | frontside |         |
|                               |                | OS           | SS      | OS        | SS      | OS           | SS      | OS        | SS      |
| <b>HSSH + OH</b>              | $\rho$         | 0.0739       | 0.1402  | 0.1516    | 0.1265  |              |         |           |         |
|                               | $\nabla^2\rho$ | 0.1627       | -0.1030 | -0.0575   | -0.0699 |              |         |           |         |
| <b>HSSCH<sub>3</sub> + OH</b> | $\rho$         | 0.0787       | 0.1443  | 0.1575    | 0.1273  | 0.0743       | 0.1438  | 0.1493    | 0.1266  |
|                               | $\nabla^2\rho$ | 0.1604       | -0.1138 | -0.0978   | -0.0710 | 0.1610       | -0.1142 | -0.0481   | -0.0706 |
| <b>HSSNH<sub>2</sub> + OH</b> | $\rho$         | 0.0900       | 0.1321  | 0.1538    | 0.1171  | 0.0819       | 0.1395  | 0.1698    | 0.1257  |
|                               | $\nabla^2\rho$ | 0.1505       | -0.0780 | -0.0790   | -0.0447 | 0.1611       | -0.1002 | -0.1764   | -0.0651 |
| <b>HSSCOOH + OH</b>           | $\rho$         | 0.0788       | 0.1411  | 0.1408    | 0.1295  | 0.0869       | 0.1372  | 0.1595    | 0.1368  |
|                               | $\nabla^2\rho$ | 0.1633       | -0.1110 | 0.0041    | -0.0853 | 0.1590       | -0.1009 | -0.0853   | -0.1046 |
| <b>HSSCN + OH</b>             | $\rho$         | 0.0683       | 0.1375  | 0.1332    | 0.1279  | 0.0929       | 0.1335  | 0.1535    | 0.1344  |
|                               | $\nabla^2\rho$ | 0.1608       | -0.0981 | 0.0395    | -0.0811 | 0.1606       | -0.0819 | -0.0375   | -0.0976 |
| <b>HSSNO<sub>2</sub> + OH</b> | $\rho$         | 0.0940       | 0.1462  | 0.1441    | 0.1331  | 0.1075       | 0.1454  | 0.1410    | 0.1675  |
|                               | $\nabla^2\rho$ | 0.1546       | -0.1092 | -0.0152   | -0.0864 | 0.1483       | -0.1016 | 0.0332    | -0.1832 |

a) Computed at BH&HLYP optimized geometries



**Table S4:** Calculated rate constants (in  $M^{-1}\cdot s^{-1}$ ) for reactions 4, to 8 and the corresponding branching ratios ( $\Gamma$  in %).

**Reactions 4, 5, and 6 for R = H**

| T      | k-tot    | K-R4     | k-R5     | k-R6     | $\Gamma$ -R4 | $\Gamma$ -R5 | $\Gamma$ -R6 |
|--------|----------|----------|----------|----------|--------------|--------------|--------------|
| 220.00 | 2.85e+08 | 2.58e+03 | 3.69e+06 | 2.81e+08 | 0.00         | 1.29         | 98.70        |
| 230.00 | 3.02e+08 | 4.18e+03 | 3.82e+06 | 2.99e+08 | 0.00         | 1.26         | 98.74        |
| 240.00 | 3.21e+08 | 6.55e+03 | 4.02e+06 | 3.17e+08 | 0.00         | 1.25         | 98.75        |
| 250.00 | 3.40e+08 | 9.93e+03 | 4.29e+06 | 3.36e+08 | 0.00         | 1.26         | 98.74        |
| 260.00 | 3.61e+08 | 1.46e+04 | 4.64e+06 | 3.57e+08 | 0.00         | 1.28         | 98.71        |
| 270.00 | 3.84e+08 | 2.11e+04 | 5.04e+06 | 3.78e+08 | 0.01         | 1.31         | 98.68        |
| 280.00 | 4.06e+08 | 2.95e+04 | 5.52e+06 | 4.01e+08 | 0.01         | 1.36         | 98.64        |
| 290.00 | 4.30e+08 | 4.07e+04 | 6.04e+06 | 4.24e+08 | 0.01         | 1.40         | 98.59        |
| 298.00 | 4.50e+08 | 5.18e+04 | 6.54e+06 | 4.43e+08 | 0.01         | 1.45         | 98.53        |
| 300.00 | 4.55e+08 | 5.50e+04 | 6.68e+06 | 4.48e+08 | 0.01         | 1.47         | 98.52        |
| 310.00 | 4.81e+08 | 7.32e+04 | 7.35e+06 | 4.74e+08 | 0.02         | 1.53         | 98.46        |
| 320.00 | 5.09e+08 | 9.59e+04 | 8.11e+06 | 5.01e+08 | 0.02         | 1.59         | 98.39        |

**Reactions 4, 5, and 6 for R = CH<sub>3</sub>**

| T      | k-tot    | K-R4     | k-R5     | k-R6     | $\Gamma$ -R4 | $\Gamma$ -R5 | $\Gamma$ -R6 |
|--------|----------|----------|----------|----------|--------------|--------------|--------------|
| 220.00 | 3.83e+09 | 7.86e+03 | 2.48e+09 | 1.35e+09 | 0.00         | 64.73        | 35.27        |
| 230.00 | 3.04e+09 | 1.14e+04 | 1.76e+09 | 1.28e+09 | 0.00         | 57.81        | 42.19        |
| 240.00 | 2.54e+09 | 1.61e+04 | 1.31e+09 | 1.23e+09 | 0.00         | 51.41        | 48.59        |
| 250.00 | 2.21e+09 | 2.24e+04 | 1.01e+09 | 1.20e+09 | 0.00         | 45.62        | 54.38        |
| 260.00 | 1.98e+09 | 3.03e+04 | 8.01e+08 | 1.18e+09 | 0.00         | 40.53        | 59.47        |
| 270.00 | 1.82e+09 | 4.05e+04 | 6.57e+08 | 1.16e+09 | 0.00         | 36.15        | 63.85        |
| 280.00 | 1.70e+09 | 5.32e+04 | 5.52e+08 | 1.15e+09 | 0.00         | 32.43        | 67.57        |
| 290.00 | 1.63e+09 | 6.89e+04 | 4.76e+08 | 1.15e+09 | 0.00         | 29.21        | 70.78        |
| 298.00 | 1.58e+09 | 8.37e+04 | 4.28e+08 | 1.16e+09 | 0.01         | 27.04        | 72.96        |
| 300.00 | 1.58e+09 | 8.78e+04 | 4.18e+08 | 1.16e+09 | 0.01         | 26.53        | 73.46        |
| 310.00 | 1.55e+09 | 1.11e+05 | 3.74e+08 | 1.17e+09 | 0.01         | 24.20        | 75.79        |
| 320.00 | 1.52e+09 | 1.38e+05 | 3.40e+08 |          | 0.01         | 22.35        | 77.64        |



|  |  |  |  |          |  |  |  |
|--|--|--|--|----------|--|--|--|
|  |  |  |  | 1.18e+09 |  |  |  |
|--|--|--|--|----------|--|--|--|

### Reactions 7 and 8 for R = CH<sub>3</sub>

| T      | k-total  | K-R7     | k-R8     | Γ-R7 | Γ-R8  |
|--------|----------|----------|----------|------|-------|
| 220.00 | 2.05e+08 | 5.79e+05 | 2.05e+08 | 0.28 | 99.72 |
| 230.00 | 1.92e+08 | 7.66e+05 | 1.91e+08 | 0.40 | 99.60 |
| 240.00 | 1.83e+08 | 9.92e+05 | 1.82e+08 | 0.54 | 99.46 |
| 250.00 | 1.78e+08 | 1.27e+06 | 1.77e+08 | 0.71 | 99.29 |
| 260.00 | 1.75e+08 | 1.59e+06 | 1.74e+08 | 0.91 | 99.09 |
| 270.00 | 1.74e+08 | 1.98e+06 | 1.72e+08 | 1.14 | 98.86 |
| 280.00 | 1.74e+08 | 2.42e+06 | 1.72e+08 | 1.39 | 98.61 |
| 290.00 | 1.75e+08 | 2.94e+06 | 1.72e+08 | 1.68 | 98.32 |
| 298.00 | 1.78e+08 | 3.41e+06 | 1.74e+08 | 1.91 | 98.09 |
| 300.00 | 1.78e+08 | 3.54e+06 | 1.75e+08 | 1.99 | 98.01 |
| 310.00 | 1.82e+08 | 4.20e+06 | 1.77e+08 | 2.31 | 97.69 |
| 320.00 | 1.86e+08 | 4.97e+06 | 1.81e+08 | 2.67 | 97.33 |

### Reactions 4, 5, and 6 for R = NH<sub>2</sub>

| # T    | k-tot    | K-R4     | k-R5     | k-R6     | Γ-R4 | Γ-R5  | Γ-R6  |
|--------|----------|----------|----------|----------|------|-------|-------|
| 220.00 | 8.49e-01 | 1.28e-07 | 4.94e-01 | 3.55e-01 | 0.00 | 58.14 | 41.86 |
| 230.00 | 1.55e+00 | 5.13e-07 | 7.92e-01 | 7.63e-01 | 0.00 | 50.96 | 49.04 |
| 240.00 | 2.79e+00 | 1.83e-06 | 1.24e+00 | 1.55e+00 | 0.00 | 44.54 | 55.46 |
| 250.00 | 4.91e+00 | 5.99e-06 | 1.91e+00 | 3.00e+00 | 0.00 | 38.97 | 61.03 |
| 260.00 | 8.44e+00 | 1.79e-05 | 2.89e+00 | 5.55e+00 | 0.00 | 34.24 | 65.76 |
| 270.00 | 1.42e+01 | 4.96e-05 | 4.30e+00 | 9.86e+00 | 0.00 | 30.36 | 69.64 |
| 280.00 | 2.33e+01 | 1.28e-04 | 6.28e+00 | 1.70e+01 | 0.00 | 27.00 | 73.00 |
| 290.00 | 3.73e+01 | 3.12e-04 | 9.04e+00 | 2.83e+01 | 0.00 | 24.21 | 75.79 |
| 298.00 | 5.37e+01 | 6.10e-04 | 1.20e+01 | 4.17e+01 | 0.00 | 22.35 | 77.65 |
| 300.00 | 5.86e+01 | 7.18e-04 | 1.29e+01 | 4.58e+01 | 0.00 | 21.92 | 78.08 |
| 310.00 | 9.02e+01 | 1.57e-03 | 1.81e+01 | 7.21e+01 | 0.00 | 20.02 | 79.98 |
| 320.00 | 1.36e+02 | 3.30e-03 | 2.49e+01 | 1.11e+02 | 0.00 | 18.37 | 81.63 |

**Reactions 7 and 8 for R = NH<sub>2</sub>**

| T      | k-total  | K-R7     | k-R8     | Γ-R7 | Γ-R8   |
|--------|----------|----------|----------|------|--------|
| 220.00 | 1.24e+07 | 1.97e-01 | 1.24e+07 | 0.00 | 100.00 |
| 230.00 | 1.34e+07 | 4.83e-01 | 1.34e+07 | 0.00 | 100.00 |
| 240.00 | 1.46e+07 | 1.11e+00 | 1.46e+07 | 0.00 | 100.00 |
| 250.00 | 1.60e+07 | 2.38e+00 | 1.60e+07 | 0.00 | 100.00 |
| 260.00 | 1.76e+07 | 4.84e+00 | 1.76e+07 | 0.00 | 100.00 |
| 270.00 | 1.94e+07 | 9.42e+00 | 1.94e+07 | 0.00 | 100.00 |
| 280.00 | 2.13e+07 | 1.75e+01 | 2.13e+07 | 0.00 | 100.00 |
| 290.00 | 2.33e+07 | 3.12e+01 | 2.33e+07 | 0.00 | 100.00 |
| 298.00 | 2.51e+07 | 4.85e+01 | 2.51e+07 | 0.00 | 100.00 |
| 300.00 | 2.56e+07 | 5.38e+01 | 2.56e+07 | 0.00 | 100.00 |
| 310.00 | 2.81e+07 | 8.99e+01 | 2.81e+07 | 0.00 | 100.00 |
| 320.00 | 3.07e+07 | 1.46e+02 | 3.07e+07 | 0.00 | 100.00 |

**Reactions 4, 5, and 6 for R = COOH**

| T      | k-tot    | K-R4     | k-R5     | k-R6     | Γ-R4 | Γ-R5 | Γ-R6   |
|--------|----------|----------|----------|----------|------|------|--------|
| 220.00 | 2.59e+10 | 1.37e+02 | 1.42e+05 | 2.59e+10 | 0.00 | 0.00 | 100.00 |
| 230.00 | 1.53e+10 | 2.24e+02 | 1.61e+05 | 1.53e+10 | 0.00 | 0.00 | 100.00 |
| 240.00 | 9.54e+09 | 3.54e+02 | 1.81e+05 | 9.54e+09 | 0.00 | 0.00 | 100.00 |
| 250.00 | 6.27e+09 | 5.43e+02 | 2.03e+05 | 6.27e+09 | 0.00 | 0.00 | 100.00 |
| 260.00 | 4.30e+09 | 8.10e+02 | 2.28e+05 | 4.30e+09 | 0.00 | 0.01 | 99.99  |
| 270.00 | 3.07e+09 | 1.18e+03 | 2.53e+05 | 3.07e+09 | 0.00 | 0.01 | 99.99  |
| 280.00 | 2.27e+09 | 1.68e+03 | 2.82e+05 | 2.27e+09 | 0.00 | 0.01 | 99.99  |
| 290.00 | 1.73e+09 | 2.35e+03 | 3.14e+05 | 1.73e+09 | 0.00 | 0.02 | 99.98  |
| 298.00 | 1.42e+09 | 3.03e+03 | 3.39e+05 | 1.42e+09 | 0.00 | 0.02 | 99.98  |
| 300.00 | 1.36e+09 | 3.22e+03 | 3.47e+05 | 1.35e+09 | 0.00 | 0.03 | 99.97  |
| 310.00 | 1.09e+09 | 4.35e+03 | 3.83e+05 | 1.09e+09 | 0.00 | 0.04 | 99.96  |
| 320.00 | 8.95e+08 | 5.80e+03 | 4.20e+05 | 8.94e+08 | 0.00 | 0.05 | 99.95  |

**Reactions 7 and 8 for R = COOH**

| T      | k-total  | K-R7     | k-R8     | $\Gamma$ -R7 | $\Gamma$ -R8 |
|--------|----------|----------|----------|--------------|--------------|
| 220.00 | 1.87e+07 | 6.53e-05 | 1.87e+07 | 0.00         | 100.00       |
| 230.00 | 1.66e+07 | 2.23e-04 | 1.66e+07 | 0.00         | 100.00       |
| 240.00 | 1.51e+07 | 6.91e-04 | 1.51e+07 | 0.00         | 100.00       |
| 250.00 | 1.40e+07 | 1.96e-03 | 1.40e+07 | 0.00         | 100.00       |
| 260.00 | 1.32e+07 | 5.16e-03 | 1.32e+07 | 0.00         | 100.00       |
| 270.00 | 1.27e+07 | 1.27e-02 | 1.27e+07 | 0.00         | 100.00       |
| 280.00 | 1.22e+07 | 2.93e-02 | 1.22e+07 | 0.00         | 100.00       |
| 290.00 | 1.20e+07 | 6.41e-02 | 1.20e+07 | 0.00         | 100.00       |
| 298.00 | 1.19e+07 | 1.16e-01 | 1.19e+07 | 0.00         | 100.00       |
| 300.00 | 1.19e+07 | 1.33e-01 | 1.19e+07 | 0.00         | 100.00       |
| 310.00 | 1.18e+07 | 2.66e-01 | 1.18e+07 | 0.00         | 100.00       |
| 320.00 | 1.18e+07 | 5.08e-01 | 1.18e+07 | 0.00         | 100.00       |

**Reactions 4, 5, and 6 for R = CN**

| T      | k-tot    | K-R4     | k-R5     | k-R6     | $\Gamma$ -R4 | $\Gamma$ -R5 | $\Gamma$ -R6 |
|--------|----------|----------|----------|----------|--------------|--------------|--------------|
| 220.00 | 7.42e+09 | 3.50e-03 | 7.30e+09 | 1.16e+08 | 0.00         | 98.43        | 1.57         |
| 230.00 | 5.91e+09 | 1.04e-02 | 5.81e+09 | 1.07e+08 | 0.00         | 98.19        | 1.81         |
| 240.00 | 4.83e+09 | 2.81e-02 | 4.73e+09 | 1.01e+08 | 0.00         | 97.91        | 2.09         |
| 250.00 | 4.03e+09 | 7.06e-02 | 3.94e+09 | 9.65e+07 | 0.00         | 97.61        | 2.39         |
| 260.00 | 3.42e+09 | 1.66e-01 | 3.33e+09 | 9.36e+07 | 0.00         | 97.27        | 2.73         |
| 270.00 | 2.95e+09 | 3.69e-01 | 2.86e+09 | 9.18e+07 | 0.00         | 96.89        | 3.11         |
| 280.00 | 2.59e+09 | 7.76e-01 | 2.50e+09 | 9.11e+07 | 0.00         | 96.48        | 3.52         |
| 290.00 | 2.30e+09 | 1.56e+00 | 2.21e+09 | 9.09e+07 | 0.00         | 96.05        | 3.95         |
| 298.00 | 2.11e+09 | 2.64e+00 | 2.01e+09 | 9.11e+07 | 0.00         | 95.67        | 4.33         |
| 300.00 | 2.06e+09 | 3.01e+00 | 1.97e+09 | 9.13e+07 | 0.00         | 95.57        | 4.43         |
| 310.00 | 1.87e+09 | 5.57e+00 | 1.78e+09 | 9.23e+07 | 0.00         | 95.06        | 4.94         |
| 320.00 | 1.71e+09 | 9.94e+00 | 1.62e+09 | 9.37e+07 | 0.00         | 94.53        | 5.47         |

**Reactions 7 and 8 for R = CN**

| T      | k-total  | K-R7     | k-R8     | $\Gamma$ -R7 | $\Gamma_n$ -R8 |
|--------|----------|----------|----------|--------------|----------------|
| 220.00 | 2.78e+07 | 3.95e-01 | 2.78e+07 | 0.00         | 100.00         |
| 230.00 | 2.42e+07 | 9.24e-01 | 2.42e+07 | 0.00         | 100.00         |
| 240.00 | 2.16e+07 | 2.02e+00 | 2.16e+07 | 0.00         | 100.00         |
| 250.00 | 1.98e+07 | 4.17e+00 | 1.98e+07 | 0.00         | 100.00         |
| 260.00 | 1.84e+07 | 8.17e+00 | 1.84e+07 | 0.00         | 100.00         |
| 270.00 | 1.75e+07 | 1.53e+01 | 1.75e+07 | 0.00         | 100.00         |
| 280.00 | 1.67e+07 | 2.75e+01 | 1.67e+07 | 0.00         | 100.00         |
| 290.00 | 1.62e+07 | 4.76e+01 | 1.62e+07 | 0.00         | 100.00         |
| 298.00 | 1.60e+07 | 7.21e+01 | 1.60e+07 | 0.00         | 100.00         |
| 300.00 | 1.59e+07 | 7.97e+01 | 1.59e+07 | 0.00         | 100.00         |
| 310.00 | 1.57e+07 | 1.29e+02 | 1.57e+07 | 0.00         | 100.00         |
| 320.00 | 1.56e+07 | 2.05e+02 | 1.56e+07 | 0.00         | 100.00         |

**Reactions 4, 5, and 6 for R = NO<sub>2</sub>**

| T      | k-tot    | K-R4     | k-R5     | k-R6     | $\Gamma$ -R4 | $\Gamma$ -R5 | $\Gamma$ -R6 |
|--------|----------|----------|----------|----------|--------------|--------------|--------------|
| 220.00 | 1.64e+08 | 2.19e+05 | 1.63e+08 | 1.14e+06 | 0.13         | 99.17        | 0.69         |
| 230.00 | 1.20e+08 | 2.50e+05 | 1.18e+08 | 1.23e+06 | 0.21         | 98.76        | 1.03         |
| 240.00 | 9.05e+07 | 2.85e+05 | 8.89e+07 | 1.34e+06 | 0.32         | 98.20        | 1.48         |
| 250.00 | 7.10e+07 | 3.23e+05 | 6.92e+07 | 1.47e+06 | 0.45         | 97.48        | 2.07         |
| 260.00 | 5.71e+07 | 3.65e+05 | 5.52e+07 | 1.60e+06 | 0.64         | 96.56        | 2.81         |
| 270.00 | 4.72e+07 | 4.10e+05 | 4.51e+07 | 1.76e+06 | 0.87         | 95.41        | 3.72         |
| 280.00 | 4.01e+07 | 4.58e+05 | 3.77e+07 | 1.92e+06 | 1.14         | 94.07        | 4.79         |
| 290.00 | 3.48e+07 | 5.13e+05 | 3.22e+07 | 2.10e+06 | 1.47         | 92.49        | 6.04         |
| 298.00 | 3.15e+07 | 5.59e+05 | 2.87e+07 | 2.25e+06 | 1.77         | 91.07        | 7.16         |
| 300.00 | 3.08e+07 | 5.70e+05 | 2.79e+07 | 2.29e+06 | 1.85         | 90.69        | 7.45         |
| 310.00 | 2.77e+07 | 6.33e+05 | 2.46e+07 | 2.51e+06 | 2.29         | 88.67        | 9.04         |
| 320.00 | 2.54e+07 | 7.01e+05 | 2.20e+07 | 2.74e+06 | 2.76         | 86.46        | 10.78        |

**Reactions 7 and 8 for R = NO<sub>2</sub>**

| T      | k-total  | K-R7     | k-R8     | Г-R7 | Г-R8   |
|--------|----------|----------|----------|------|--------|
| 220.00 | 8.96e+09 | 6.99e-04 | 8.96e+09 | 0.00 | 100.00 |
| 230.00 | 6.24e+09 | 2.21e-03 | 6.24e+09 | 0.00 | 100.00 |
| 240.00 | 4.54e+09 | 6.37e-03 | 4.54e+09 | 0.00 | 100.00 |
| 250.00 | 3.44e+09 | 1.70e-02 | 3.44e+09 | 0.00 | 100.00 |
| 260.00 | 2.68e+09 | 4.21e-02 | 2.68e+09 | 0.00 | 100.00 |
| 270.00 | 2.16e+09 | 9.79e-02 | 2.16e+09 | 0.00 | 100.00 |
| 280.00 | 1.77e+09 | 2.16e-01 | 1.77e+09 | 0.00 | 100.00 |
| 290.00 | 1.49e+09 | 4.53e-01 | 1.49e+09 | 0.00 | 100.00 |
| 298.00 | 1.32e+09 | 7.91e-01 | 1.32e+09 | 0.00 | 100.00 |
| 300.00 | 1.28e+09 | 9.05e-01 | 1.28e+09 | 0.00 | 100.00 |
| 310.00 | 1.12e+09 | 1.74e+00 | 1.12e+09 | 0.00 | 100.00 |
| 320.00 | 9.84e+08 | 3.21e+00 | 9.84e+08 | 0.00 | 100.00 |

**Table S5:** Absolute energies and enthalpic and entropic corrections (in hartree), Zero point energies (ZPVE in kcal·mol<sup>-1</sup>) and entropy (S in cal·mol<sup>-1</sup>·K<sup>-1</sup>).

**OH + HSSH**

|                   | Energy     | ZPVE    | H correction | G correction | S       | Energy           | Energy         |
|-------------------|------------|---------|--------------|--------------|---------|------------------|----------------|
|                   | BH&HLYP    | BH&HLYP | BH&HLYP      | BH&HLYP      | BH&HLYP | CCSD(T)//BH&HLYP | CCSD(T)//QCISD |
| <b>OH</b>         | -75.73240  | 5.6     | 0.01216      | -0.00804     | 52.5    | -75.645461       | -75.645568     |
| <b>HSO</b>        | -473.96206 | 6.8     | 0.01467      | -0.01270     | 57.5    | -473.423482      |                |
| <b>HOS</b>        | -473.96204 | 8.7     | 0.01768      | -0.00951     | 57.2    | -473.421538      |                |
| <b>HSSH</b>       | -797.60461 | 11.9    | 0.02331      | -0.00588     | 61.6    | -796.687438      | -796.687565    |
| <b>HSOH</b>       | -474.58680 | 14.8    | 0.02763      | 0.00005      | 58.1    | -474.051572      | -474.052049    |
| <b>SH</b>         | -398.75697 | 3.9     | 0.00959      | -0.01221     | 45.9    | -398.293266      | -398.293305    |
| <b>HSO</b>        | -473.96206 | 6.8     | 0.01467      | -0.01270     | 57.5    | -473.423482      |                |
| <b>SH2</b>        | -399.40130 | 9.8     | 0.01934      | -0.00463     | 50.5    | -398.943541      |                |
| <b>HS2</b>        | -796.98591 | 6.1     | 0.01364      | -0.01522     | 60.7    | -796.063886      | -796.063886    |
| <b>H2O</b>        | -76.41851  | 13.9    | 0.02599      | 0.00461      | 45.0    | -76.342005       | -76.342285     |
| <b>Reaction 1</b> |            |         |              |              |         |                  |                |
| <b>HSSH + OH</b>  | -873.33700 | 17.5    | 0.03546      | -0.01392     | 114.1   | -872.332899      | -872.333133    |
| <b>CRFTS1a</b>    | -873.34206 | 19.0    | 0.03750      | -0.00038     | 79.7    | -872.339808      | -872.340316    |
| <b>FTS1a</b>      | -873.31599 | 19.8    | 0.03753      | 0.00309      | 72.5    | -872.326442      | -872.326940    |
| <b>CPFTS1a</b>    | -873.34717 | 19.7    | 0.03889      | -0.00049     | 82.9    | -872.349684      | -872.350374    |
| <b>CRFTS1b</b>    | -873.34054 | 18.8    | 0.03740      | -0.00208     | 83.1    | -872.337962      | -872.338255    |
| <b>FTS1b</b>      | -873.31967 | 20.2    | 0.03798      | 0.00370      | 72.2    | -872.330018      | -872.330437    |
| <b>CPFTS1b</b>    | -873.34733 | 20.0    | 0.03903      | 0.00084      | 80.4    | -872.350089      | -872.350380    |
| <b>CRBTS1a</b>    | -873.34053 | 18.5    | 0.03725      | -0.00340     | 85.5    | -872.337307      | -872.338255    |

|                             |            |         |         |          |       |             |             |
|-----------------------------|------------|---------|---------|----------|-------|-------------|-------------|
| <b>BTS1a</b>                | -873.33692 | 19.5    | 0.03735 | 0.00214  | 74.1  | -872.340147 | -872.338830 |
| <b>CPBTS1a</b>              | -873.34708 | 20.7    | 0.03951 | 0.00412  | 74.5  | -872.354013 | -872.354767 |
| <b>CRBTS1b</b>              | -873.34205 | 19.0    | 0.03750 | -0.00043 | 79.8  | -872.339812 | -872.340319 |
| <b>BTS1b</b>                | -873.33866 | 19.6    | 0.03741 | 0.00235  | 73.8  | -872.341303 | -872.339399 |
| <b>CPBTS1b</b>              | -873.34642 | 20.5    | 0.03931 | 0.00359  | 75.2  | -872.352896 | -872.353637 |
| <b>Reaction 3</b>           |            |         |         |          |       |             |             |
| <b>CRPTS3a</b>              | -873.34205 | 19.0    | 0.03748 | -0.00046 | 79.8  | -872.339836 | -872.340319 |
| <b>PTS3a</b>                | -873.32227 | 18.0    | 0.03450 | -0.00036 | 73.4  | -872.329456 | -872.329895 |
| <b>CPPTS3a</b>              | -873.41149 | 21.8    | 0.04201 | 0.00367  | 80.7  | -872.414634 | -872.415010 |
| <b>CRHTS3a</b>              | -873.34053 | 18.6    | 0.03727 | -0.00336 | 85.5  | -872.337307 | -872.338255 |
| <b>HTS3a</b>                | -873.33673 | 17.5    | 0.03434 | -0.00233 | 77.2  | -872.335688 | -872.335749 |
| <b>CPHTS3a</b>              | -873.41148 | 21.8    | 0.04201 | 0.00364  | 80.7  | -872.414634 | -872.415010 |
| <b>CRHTS3b</b>              | -873.34205 | 19.0    | 0.03750 | -0.00043 | 79.8  | -872.339836 | -872.340319 |
| <b>HTS3b</b>                | -873.33623 | 17.4    | 0.03430 | -0.00245 | 77.3  | -872.335293 | -872.335329 |
| <b>CPHTS3b</b>              | -873.40802 | 21.3    | 0.04181 | 0.00032  | 87.3  | -872.411005 | -872.411525 |
| <b>HSOH·SH</b>              | -873.35243 | 20.6    | 0.03932 | 0.00306  | 76.3  | -872.355717 |             |
| <b>TSTRF</b>                | -873.32826 | 15.7    | 0.03132 | -0.00508 | 76.6  | -872.332287 |             |
| <b>Reaction 5</b>           |            |         |         |          |       |             |             |
| <b>HSOH + SH</b>            | -873.34377 | 18.6931 | 0.03722 | -0.01216 | 103.9 | -872.344839 |             |
| <b>CRHTS5a</b>              | -873.35243 | 20.6    | 0.03932 | 0.00306  | 76.3  | -872.355717 |             |
| <b>HTS5a</b>                | -873.32826 | 15.7    | 0.03132 | -0.00508 | 76.6  | -872.332287 |             |
| <b>CPHTS5a</b>              | -873.36764 | 17.9    | 0.03617 | -0.00365 | 83.8  | -872.373374 |             |
| <b>CRHTS5b</b>              | -873.35132 | 20.4    | 0.03915 | 0.00252  | 77.1  | -872.354630 |             |
| <b>HTS5b</b>                | -873.32823 | 15.6    | 0.03125 | -0.00520 | 76.7  | -872.332128 |             |
| <b>CPHTS5b</b>              | -873.36764 | 17.8    | 0.03616 | -0.00370 | 83.9  | -872.373377 |             |
| <b>HSO + SH<sub>2</sub></b> | -873.36336 | 16.6    | 0.03401 | -0.01733 | 108.0 | -872.367023 |             |
| <b>Rection 6</b>            |            |         |         |          |       |             |             |
| <b>CRHTS6a</b>              | -873.34732 | 20.0    | 0.03902 | 0.00079  | 80.5  | -872.350083 |             |
| <b>HTS6a</b>                | -873.33776 | 17.0    | 0.03351 | -0.00302 | 76.9  | -872.341826 |             |

|                |            |      |         |          |      |             |  |
|----------------|------------|------|---------|----------|------|-------------|--|
| <b>CPHTS6a</b> | -873.37077 | 20.0 | 0.03934 | -0.00026 | 83.3 | -872.374578 |  |
| <b>CRHTS6b</b> | -873.35243 | 20.6 | 0.03932 | 0.00307  | 76.3 | -872.355719 |  |
| <b>HTS6b</b>   | -873.33738 | 17.0 | 0.03359 | -0.00294 | 76.9 | -872.341564 |  |
| <b>CPTHS6b</b> | -873.37079 | 20.0 | 0.03934 | -0.00040 | 83.6 | -872.374569 |  |

### OH + CH<sub>3</sub>SSH

|                          |            |      |         |          |      |            |            |
|--------------------------|------------|------|---------|----------|------|------------|------------|
| <b>SH<sub>2</sub></b>    | -399.40130 | 9.8  | 0.01934 | -0.00463 | 50.5 | -398.94354 |            |
| <b>CH<sub>3</sub>SH</b>  | -438.69719 | 29.8 | 0.05195 | 0.02325  | 60.4 | -438.18021 |            |
| <b>CH<sub>3</sub>SO</b>  | -513.27380 | 26.1 | 0.04655 | 0.01470  | 67.0 | -512.67676 |            |
| <b>CH<sub>3</sub>SSH</b> | -836.90564 | 31.0 | 0.05516 | 0.02179  | 70.2 | -835.93079 | -835.93112 |
| <b>CH<sub>3</sub>S</b>   | -438.05870 | 23.1 | 0.04085 | 0.01251  | 59.6 | -437.53542 | -437.53565 |
| <b>CH<sub>3</sub>SOH</b> | -513.89135 | 33.8 | 0.05923 | 0.02746  | 66.9 | -513.29756 | -513.29821 |
| <b>CH<sub>2</sub>SSH</b> | -836.24643 | 21.6 | 0.04041 | 0.00592  | 72.6 |            |            |
| <b>Reaction 1</b>        |            |      |         |          |      |            |            |
| <b>CRBTS1a</b>           | -912.64166 | 37.6 | 0.06909 | 0.02434  | 94.2 | -911.58079 | -911.58110 |
| <b>BTS1a</b>             | -912.63697 | 38.7 | 0.06941 | 0.02991  | 83.1 | -911.58311 | -911.58225 |
| <b>CPBTS1a</b>           | -912.64538 | 39.9 | 0.07170 | 0.03152  | 84.6 | -911.59545 | -911.59644 |
| <b>CRBTS1b</b>           | -912.64236 | 37.9 | 0.06933 | 0.02613  | 90.9 | -911.58244 | -911.58272 |
| <b>BTS1b</b>             | -912.63960 | 38.8 | 0.06949 | 0.03034  | 82.4 | -911.58571 | -911.58412 |
| <b>CPBTS1b</b>           | -912.64457 | 39.8 | 0.07154 | 0.03155  | 84.2 | -911.59431 | -911.59529 |
| <b>CRFTS1b</b>           | -912.64165 | 37.6 | 0.06912 | 0.02436  | 94.2 | -911.58079 | -911.58110 |
| <b>FTS1b</b>             | -912.61980 | 39.1 | 0.06976 | 0.03087  | 81.9 | -911.57288 | -911.57353 |
| <b>CPFTS1b</b>           | -912.65327 | 39.3 | 0.07130 | 0.02692  | 93.4 | -911.59738 | -911.59830 |
| <b>CRFTS1a</b>           | -912.64235 | 37.9 | 0.06934 | 0.02594  | 91.3 | -911.58244 | -911.58272 |
| <b>FTS1a</b>             | -912.61397 | 39.1 | 0.06974 | 0.03106  | 81.4 | -911.56710 | -911.56776 |
| <b>CPFTS1a</b>           | -912.64456 | 39.8 | 0.07150 | 0.03137  | 84.5 | -911.59430 | -911.59529 |
| <b>Reaction 2</b>        |            |      |         |          |      |            |            |
| <b>CRBTS2a</b>           | -912.64401 | 38.3 | 0.06964 | 0.02820  | 87.2 | -911.58613 | -911.58800 |
| <b>BTS2a</b>             | -912.64082 | 38.5 | 0.06910 | 0.03018  | 81.9 | -911.58815 | -911.58694 |



|                   |            |      |         |         |      |            |            |
|-------------------|------------|------|---------|---------|------|------------|------------|
| <b>CPBTS2a</b>    | -912.65213 | 39.3 | 0.07095 | 0.03064 | 84.8 | -911.60085 | -911.60279 |
| <b>CRBTS2b</b>    | -912.64584 | 38.5 | 0.06971 | 0.02918 | 85.3 | -911.58855 | -911.59031 |
| <b>BTS2b</b>      | -912.64303 | 38.6 | 0.06915 | 0.03049 | 81.4 | -911.58964 | -911.58894 |
| <b>CPBTS2b</b>    | -912.65416 | 38.9 | 0.07059 | 0.02863 | 88.3 | -911.59896 | -911.59940 |
| <b>CRFTS2b</b>    | -912.64401 | 38.3 | 0.06962 | 0.02823 | 87.1 | -911.58613 | -911.58800 |
| <b>FTS2b</b>      | -912.62704 | 39.1 | 0.06969 | 0.03131 | 80.8 | -911.58052 | -911.58118 |
| <b>CPFTS2b</b>    | -912.66070 | 39.5 | 0.07094 | 0.03132 | 83.4 | -911.60692 | -911.60789 |
| <b>CRFTS2a</b>    | -912.64585 | 38.5 | 0.06972 | 0.02920 | 85.3 | -911.58849 | -911.59031 |
| <b>FTS2a</b>      | -912.62306 | 38.7 | 0.06928 | 0.03061 | 81.4 | -911.57656 | -911.57729 |
| <b>CPFTS2a</b>    | -912.65408 | 38.9 | 0.07065 | 0.02817 | 89.4 | -911.59880 | -911.59940 |
| <b>Reaction 5</b> |            |      |         |         |      |            |            |
| <b>CR5a</b>       | -912.65328 | 39.3 | 0.07131 | 0.02713 | 93.0 | -911.59738 |            |
| <b>HTS5a</b>      | -912.62656 | 35.1 | 0.06359 | 0.02311 | 85.2 | -911.57437 |            |
| <b>CP5a</b>       | -912.66391 | 37.5 | 0.06876 | 0.02402 | 94.2 | -911.61078 |            |
| <b>CR5b</b>       | -912.65328 | 39.3 | 0.07131 | 0.02713 | 93.0 | -911.59738 |            |
| <b>HTS5b</b>      | -912.62613 | 35.0 | 0.06366 | 0.02189 | 87.9 | -911.57224 |            |
| <b>CP5b</b>       | -912.66391 | 37.5 | 0.06876 | 0.02402 | 94.2 | -911.61078 |            |
| <b>Reactio 6</b>  |            |      |         |         |      |            |            |
| <b>CR6a</b>       | -912.64947 | 38.8 | 0.07078 | 0.02581 | 94.7 | -911.59373 |            |
| <b>HTS6a</b>      | -912.63724 | 36.6 | 0.06617 | 0.02529 | 86.0 | -911.58396 |            |
| <b>CP6a</b>       | -912.66879 | 39.9 | 0.07199 | 0.02906 | 90.3 | -911.61413 |            |
| <b>CR6b</b>       | -912.65328 | 39.3 | 0.07130 | 0.02687 | 93.5 | -911.59738 |            |
| <b>HTS6b</b>      | -912.63586 | 36.5 | 0.06607 | 0.02382 | 88.9 | -911.58199 |            |
| <b>CP6b</b>       | -912.66863 | 39.9 | 0.07198 | 0.02885 | 90.8 | -911.61384 |            |
| <b>Reaction 8</b> |            |      |         |         |      |            |            |
| <b>CR8a</b>       | -912.66070 | 39.5 | 0.07093 | 0.03129 | 83.4 | -911.60693 |            |
| <b>HTS8a</b>      | -912.63840 | 34.7 | 0.06310 | 0.02288 | 84.7 | -911.58362 |            |
| <b>CP8a</b>       | -912.67927 | 36.9 | 0.06801 | 0.02284 | 95.1 | -911.62636 |            |
| <b>CR8b</b>       | -912.65876 | 39.4 | 0.07080 | 0.03080 | 84.2 | -911.60483 |            |

|                    |            |      |         |         |      |            |            |
|--------------------|------------|------|---------|---------|------|------------|------------|
| <b>HTS8b</b>       | -912.63845 | 34.6 | 0.06301 | 0.02274 | 84.8 | -911.58349 |            |
| <b>CP6b</b>        | -912.67916 | 36.8 | 0.06801 | 0.02264 | 95.5 | -911.62636 |            |
| <b>Reaction 11</b> |            |      |         |         |      |            |            |
| <b>CRHST11a</b>    | -912.64299 | 37.9 | 0.06911 | 0.02645 | 89.8 | -911.58252 | -911.58296 |
| <b>HTS11a</b>      | -912.62768 | 34.9 | 0.06334 | 0.02327 | 84.3 | -911.57364 | -911.57392 |
| <b>CPHTS11a</b>    | -912.66775 | 36.7 | 0.06860 | 0.02119 | 99.8 | -911.61348 | -911.61424 |
| <b>CRHTS11b</b>    | -912.64333 | 37.8 | 0.06909 | 0.02565 | 91.4 | -911.58251 | -911.58296 |
| <b>HTS11b</b>      | -912.62699 | 34.7 | 0.06328 | 0.02233 | 86.2 | -911.57245 | -911.57247 |
| <b>CPHTS11b</b>    | -912.66776 | 36.7 | 0.06859 | 0.02116 | 99.8 | -911.61347 | -911.61424 |
| <b>Reaction 3</b>  |            |      |         |         |      |            |            |
| <b>CRPTS3a</b>     | -912.64584 | 38.5 | 0.06970 | 0.02915 | 85.4 | -911.58851 | -911.59031 |
| <b>PTS3a</b>       | -912.63000 | 37.4 | 0.06675 | 0.02904 | 79.4 | -911.58147 | -911.58228 |
| <b>CPPTS3a</b>     | -912.71560 | 40.8 | 0.07396 | 0.03033 | 91.8 | -911.66163 | -911.66163 |
| <b>CRPTS3b</b>     | -912.64584 | 38.5 | 0.06970 | 0.02913 | 85.4 | -911.58850 | -911.59031 |
| <b>PTS3b</b>       | -912.62621 | 36.8 | 0.06625 | 0.02752 | 81.5 | -911.57678 | -911.57796 |
| <b>CPPTS3b</b>     | -912.71560 | 40.8 | 0.07397 | 0.03035 | 91.8 | -911.66163 | -911.66163 |
| <b>CRHTS3a</b>     | -912.64584 | 38.5 | 0.06970 | 0.02913 | 85.4 | -911.58850 | -911.59031 |
| <b>HST3a</b>       | -912.63887 | 36.7 | 0.06655 | 0.02569 | 86.0 | -911.58002 | -911.58034 |
| <b>CPHTS3a</b>     | -912.71559 | 40.8 | 0.07397 | 0.03035 | 91.8 | -911.66163 | -911.66163 |
| <b>CRHTS3b</b>     | -912.64235 | 37.9 | 0.06934 | 0.02596 | 91.3 | -911.58244 | -911.58272 |
| <b>HTS3b</b>       | -912.63792 | 36.5 | 0.06639 | 0.02525 | 86.6 |            | -911.57991 |
| <b>CPHTS3b</b>     | -912.71559 | 40.8 | 0.07397 | 0.03035 | 91.8 | -911.66163 | -911.66163 |

#### OH + NH<sub>2</sub>SSH

|                          |            |      |         |         |      |            |            |
|--------------------------|------------|------|---------|---------|------|------------|------------|
| <b>NH<sub>2</sub>SO</b>  | -529.31862 | 19.0 | 0.03524 | 0.00386 | 66.0 | -528.71594 |            |
| <b>NH<sub>2</sub>SH</b>  | -454.72586 | 23.0 | 0.04087 | 0.01290 | 58.9 | -454.20219 |            |
| <b>NH<sub>2</sub>SSH</b> | -852.94248 | 24.2 | 0.04395 | 0.01146 | 68.4 | -851.96071 | -851.96123 |
| <b>NH<sub>2</sub>SOH</b> | -529.93598 | 27.1 | 0.04820 | 0.01733 | 65.0 | -529.33575 | -529.33654 |
| <b>NH<sub>2</sub>S</b>   | -454.11109 | 16.4 | 0.03044 | 0.00228 | 59.3 | -453.58077 | -453.58108 |

|                          |            |      |         |         |      |            |            |
|--------------------------|------------|------|---------|---------|------|------------|------------|
| <b><i>Reaction 1</i></b> |            |      |         |         |      |            |            |
| <b>CR1a</b>              | -928.67838 | 31.0 | 0.05801 | 0.01571 | 89.0 | -927.61147 | -927.61106 |
| <b>FTS1a</b>             | -928.65913 | 32.2 | 0.05852 | 0.02085 | 79.3 | -927.60472 | -927.60550 |
| <b>CP1b</b>              | -928.70827 | 32.8 | 0.06041 | 0.01917 | 86.8 | -927.64625 | -927.64713 |
| <b>CR1b</b>              | -928.67986 | 31.4 | 0.05816 | 0.01669 | 87.3 | -927.61301 | -927.61361 |
| <b>FTS1b</b>             | -928.65082 | 32.4 | 0.05838 | 0.02150 | 77.6 | -927.59910 | -927.60004 |
| <b>CP1c</b>              | -928.70334 | 32.7 | 0.06049 | 0.01765 | 90.2 | -927.64122 | -927.64227 |
| <b>CR1b</b>              | -928.67986 | 31.4 | 0.05817 | 0.01679 | 87.1 | -927.61301 | -927.61361 |
| <b>BTS1b</b>             | -928.67179 | 31.5 | 0.05782 | 0.01876 | 82.2 | -927.61050 | -927.60938 |
| <b>CP1a</b>              | -928.70388 | 32.4 | 0.06021 | 0.01789 | 89.1 | -927.64148 | -927.64220 |
| <b>CR1a</b>              | -928.67834 | 30.7 | 0.05786 | 0.01362 | 93.1 | -927.61147 | -927.61106 |
| <b>BTS1a</b>             | -928.67304 | 31.8 | 0.05818 | 0.01943 | 81.6 | -927.61301 | -927.61231 |
| <b>CP1a</b>              | -928.70388 | 32.4 | 0.06019 | 0.01780 | 89.2 | -927.64147 | -927.64220 |
| <b><i>Reaction 2</i></b> |            |      |         |         |      |            |            |
| <b>CR3a</b>              | -928.68257 | 31.8 | 0.05857 | 0.01905 | 83.2 | -927.61862 | -927.62098 |
| <b>FTS2a</b>             | -928.66474 | 32.2 | 0.05823 | 0.02139 | 77.5 | -927.61130 | -927.61224 |
| <b>CP2c</b>              | -928.70463 | 32.7 | 0.05979 | 0.02080 | 82.1 | -927.64434 | -927.64541 |
| <b>CR4a</b>              | -928.68428 | 31.8 | 0.05857 | 0.01949 | 82.2 | -927.62072 | -927.62283 |
| <b>FTS2b</b>             | -928.66376 | 31.9 | 0.05808 | 0.02036 | 79.4 | -927.61038 | -927.61115 |
| <b>CP2b</b>              | -928.70027 | 32.4 | 0.05957 | 0.01974 | 83.8 | -927.63919 | -927.63978 |
| <b>CR2a</b>              | -928.68086 | 31.4 | 0.05819 | 0.01856 | 83.4 | -927.61733 | -927.61969 |
| <b>BTS2a</b>             | -928.67539 | 31.6 | 0.05782 | 0.01965 | 80.3 | -927.61737 | -927.61696 |
| <b>CP2a</b>              | -928.70027 | 32.4 | 0.05956 | 0.01972 | 83.9 | -927.63920 | -927.63978 |
| <b>CR2b</b>              | -928.67911 | 31.1 | 0.05805 | 0.01737 | 85.6 | -927.61467 | -927.61760 |
| <b>BTS2b</b>             | -928.67269 | 31.5 | 0.05771 | 0.01913 | 81.2 | -927.61422 | -927.61464 |
| <b>CP2b</b>              | -928.70027 | 32.4 | 0.05954 | 0.01960 | 84.1 | -927.63919 | -927.63978 |
| <b><i>Reaction 3</i></b> |            |      |         |         |      |            |            |
| <b>CRHTS3b</b>           | -928.68427 | 31.8 | 0.05858 | 0.01950 | 82.2 | -927.62072 | -927.62283 |
| <b>HTS3b</b>             | -928.67536 | 29.8 | 0.05515 | 0.01511 | 84.3 | -927.60980 | -927.61019 |

|                   |            |      |         |         |      |            |            |
|-------------------|------------|------|---------|---------|------|------------|------------|
| <b>CPHTS3b</b>    | -928.75414 | 34.0 | 0.06274 | 0.02126 | 87.3 | -927.69411 | -927.69489 |
| <b>CRHTS3a</b>    | -928.68026 | 31.1 | 0.05811 | 0.01628 | 88.0 |            | -927.61423 |
| <b>HTS3a</b>      | -928.67430 | 29.6 | 0.05497 | 0.01469 | 84.8 | -927.60902 | -927.61024 |
| <b>CPHTS3a</b>    | -928.75413 | 34.0 | 0.06273 | 0.02122 | 87.4 | -927.69411 | -927.69489 |
| <b>CRPTS3a</b>    | -928.68087 | 31.4 | 0.05821 | 0.01860 | 83.4 |            | -927.61969 |
| <b>PTS3a</b>      | -928.66356 | 30.3 | 0.05531 | 0.01815 | 78.2 | -927.60929 | -927.61027 |
| <b>CPPTS3a</b>    | -928.75119 | 33.9 | 0.06249 | 0.02093 | 87.5 |            | -927.69276 |
| <b>NH2SS</b>      | -852.32669 | 18.3 | 0.03429 | 0.00149 | 69.0 |            |            |
| <b>Reaction 5</b> |            |      |         |         |      |            |            |
| <b>CRHTS5a</b>    | -928.70827 | 32.8 | 0.06042 | 0.01918 | 86.8 | -927.64625 |            |
| <b>HTS5a</b>      | -928.66876 | 29.0 | 0.05327 | 0.01496 | 80.6 | -927.61201 |            |
| <b>CPHTS5a</b>    | -928.69330 | 31.1 | 0.05792 | 0.01518 | 89.9 | -927.63388 |            |
| <b>CRHTS5b</b>    | -928.70722 | 32.6 | 0.06040 | 0.01778 | 90.7 | -927.64425 |            |
| <b>HTS5b</b>      | -928.66363 | 28.2 | 0.05266 | 0.01205 | 85.5 | -927.60272 |            |
| <b>CPHTS5b</b>    | -928.69330 | 31.1 | 0.05792 | 0.01518 | 89.9 | -927.63388 |            |
| <b>Reaction 6</b> |            |      |         |         |      |            |            |
| <b>CRHTS6a</b>    | -928.70567 | 32.6 | 0.06040 | 0.01795 | 89.4 | -927.64310 |            |
| <b>HTS6a</b>      | -928.67497 | 29.9 | 0.05521 | 0.01576 | 83.0 | -927.61510 |            |
| <b>CPHTS6a</b>    | -928.70152 | 33.7 | 0.06141 | 0.02072 | 85.6 | -927.64123 |            |
| <b>CRHTS6b</b>    | -928.70566 | 32.6 | 0.06040 | 0.01792 | 89.4 | -927.64309 |            |
| <b>HTS6b</b>      | -928.67683 | 30.1 | 0.05535 | 0.01572 | 83.4 | -927.61665 |            |
| <b>CPHTS6b</b>    | -928.69615 | 32.9 | 0.06071 | 0.01639 | 73.6 | -927.63382 |            |
| <b>Reaction 8</b> |            |      |         |         |      |            |            |
| <b>CRHTS8a</b>    | -928.70463 | 32.7 | 0.05979 | 0.02087 | 81.9 | -927.64433 |            |
| <b>HTS8a</b>      | -928.68223 | 27.9 | 0.05188 | 0.01262 | 82.6 | -927.62125 |            |
| <b>CPHTS8a</b>    | -928.72495 | 30.0 | 0.05676 | 0.01334 | 91.4 | -927.66696 |            |
| <b>CRHTS8b</b>    | -928.70463 | 32.7 | 0.05979 | 0.02087 | 81.9 | -927.64433 |            |
| <b>HTS8b</b>      | -928.68220 | 27.8 | 0.05179 | 0.01230 | 83.1 | -927.62110 |            |
| <b>CPHTS8b</b>    | -928.72472 | 30.0 | 0.05675 | 0.01325 | 91.6 | -927.66675 |            |

**OH + (COOH)SSH**

|                   |             |      |         |          |       |              |              |
|-------------------|-------------|------|---------|----------|-------|--------------|--------------|
| <b>(COOH)SO</b>   | -662.50634  | 18.1 | 0.03490 | -0.00064 | 74.8  | -661.7514268 |              |
| <b>(COOH)SH</b>   | -587.94572  | 22.1 | 0.04031 | 0.00807  | 67.9  | -587.270045  |              |
| <b>(COOH)SSH</b>  | -986.14972  | 23.0 | 0.04339 | 0.00639  | 77.9  | -985.0168634 | -985.0182332 |
| <b>(COOH)SOH</b>  | -663.13832  | 25.8 | 0.04752 | 0.01203  | 74.7  | -662.3856897 | -662.3873817 |
| <b>(COOH)S</b>    | -587.30407  | 15.9 | 0.03023 | -0.00210 | 68.2  | -586.622508  | -586.6237621 |
| <b>Reaction 1</b> |             |      |         |          |       |              |              |
| <b>CRBTS1a</b>    | -1061.88364 | 29.5 | 0.05733 | 0.00862  | 102.5 | -1060.664461 | -1060.66638  |
| <b>BTS1a</b>      | -1061.87921 | 30.7 | 0.05766 | 0.01457  | 990.7 | -1060.667236 | -1060.667198 |
| <b>CPBTS1a</b>    | -1061.89316 | 31.4 | 0.05986 | 0.01166  | 101.5 | -1060.678555 | -1060.679194 |
| <b>CRBTS1b</b>    | -1061.88536 | 29.5 | 0.05732 | 0.00855  | 102.7 | -1060.666519 | -1060.668543 |
| <b>BTS1b</b>      | -1061.88064 | 30.6 | 0.05755 | 0.01430  | 91.0  | -1060.668353 | -1060.668834 |
| <b>CPBTS1b</b>    | -1061.90769 | 32.4 |         |          |       | -1060.69372  | -1060.695211 |
| <b>CRFTS1a</b>    | -1061.89187 | 30.1 | 0.05758 | 0.01171  | 96.5  | -1060.673245 | -1060.674605 |
| <b>FTS1a</b>      | -1061.85758 | 31.4 | 0.05812 | 0.01696  | 86.6  | -1060.653377 | -1060.654894 |
| <b>CPFTS1b</b>    | -1061.90770 | 32.4 | 0.06024 | 0.01721  | 90.5  | -1060.693724 | -1060.695213 |
| <b>CRGTS1b</b>    | -1061.88541 | 29.6 | 0.05739 | 0.01006  | 99.6  | -1060.667157 | -1060.668543 |
| <b>FTS1b</b>      | -1061.86456 | 31.0 | 0.05786 | 0.01566  | 88.8  | -1060.659388 | -1060.660932 |
| <b>CPFTS1b</b>    | -1061.89896 | 32.0 | 0.06008 | 0.01597  | 92.8  | -1060.685172 | -1060.686817 |
| <b>Reaction 2</b> |             |      |         |          |       |              |              |
| <b>CRBTS2a</b>    | -1061.88469 | 29.6 | 0.05731 | 0.01040  | 98.7  | -1060.667212 | -1060.668874 |
| <b>BTS2a</b>      | -1061.87322 | 30.4 | 0.05726 | 0.01456  | 89.9  | -1060.664532 | -1060.664125 |
| <b>CPBTS2a</b>    | -1061.89659 | 30.7 | 0.05881 | 0.01061  | 101.4 | -1060.681861 | -1060.683796 |
| <b>CRFTS2a</b>    | -1061.88626 | 29.7 | 0.05738 | 0.01132  | 96.9  | -1060.66887  | -1060.670742 |
| <b>FTS2a</b>      | -1061.85914 | 30.6 | 0.05733 | 0.01548  | 88.1  | -1060.655638 | -1060.657344 |
| <b>CPFTS2a</b>    | -1061.90330 | 30.9 | 0.05878 | 0.01373  | 94.8  | -1060.689735 | -1060.691579 |
| <b>CRFTS2b</b>    | -1061.88470 | 29.6 | 0.05732 | 0.01045  | 98.6  | -1060.667218 | -1060.668874 |
| <b>FTS2b</b>      | -1061.86144 | 30.8 | 0.05763 | 0.01582  | 88.0  | -1060.657731 | -1060.659358 |

|                    |             |      |         |          |       |              |              |
|--------------------|-------------|------|---------|----------|-------|--------------|--------------|
| <b>CPFTS2b</b>     | -1061.89662 | 30.3 | 0.05862 | 0.00994  | 102.5 | -1060.682586 | -1060.683796 |
| <b>Reaction 12</b> |             |      |         |          |       |              |              |
| <b>CRPTS12a</b>    | -1061.89575 | 30.4 | 0.05761 | 0.01383  | 92.1  | -1060.676691 | -1060.678075 |
| <b>PTS12a</b>      | -1061.87018 | 28.5 | 0.05356 | 0.01243  | 86.6  | -1060.659519 | -1060.66114  |
| <b>CPPTS12a</b>    | -1061.89310 | 29.6 | 0.05786 | 0.00791  | 105.1 | -1060.677249 | -1060.679547 |
| <b>CRPTS12b</b>    | -1061.89575 | 30.4 | 0.05761 | 0.01382  | 92.2  | -1060.676691 | -1060.678075 |
| <b>PTS12b</b>      | -1061.86991 | 28.5 | 0.05355 | 0.01242  | 86.6  | -1060.6593   | -1060.660918 |
| <b>CPPTS12b</b>    | -1061.89309 | 29.6 | 0.05786 | 0.00791  | 105.1 | -1060.677244 | -1060.679547 |
| <b>Reaction 3</b>  |             |      |         |          |       |              |              |
| <b>CRHTS3b</b>     | -1061.89187 | 30.1 | 0.05760 | 0.01187  | 96.3  | -1060.673245 | -1060.674605 |
| <b>HTS3b</b>       | -1061.88427 | 29.7 | 0.05422 | 0.01225  | 88.3  | -1060.670471 | -1060.671474 |
| <b>CPHTS3b</b>     | -1061.95281 | 35.6 | 0.06223 | 0.01326  | 103.1 | -1060.739872 | -1060.741598 |
| <b>CRHTS3a</b>     | -1061.89188 | 30.1 | 0.05760 | 0.01187  | 96.3  | -1060.673245 | -1060.674605 |
| <b>HTS3a</b>       | -1061.88085 | 28.2 | 0.05411 | 0.00983  | 93.2  | -1060.664936 | -1060.666146 |
| <b>CPHTS3b</b>     | -1061.95281 | 35.6 | 0.06223 | 0.01326  | 103.1 | -1060.739872 | -1060.741598 |
| <b>(COOH)SS</b>    | -985.52801  | 17.3 | 0.03387 | -0.00301 | 77.6  |              |              |
| <b>Reaction 5</b>  |             |      |         |          |       |              |              |
| <b>CRHTS5a</b>     | -1061.89561 | 31.5 | 0.05992 | 0.01271  | 99.4  | -1060.681243 |              |
| <b>HTS5a</b>       | -1061.87947 | 27.6 | 0.05251 |          | 89.9  | -1060.667834 |              |
| <b>CPHTS5a</b>     | -1061.91725 | 30.1 | 0.05734 | 0.01186  | 95.7  | -1060.705339 |              |
| <b>Reaction 6</b>  |             |      |         |          |       |              |              |
| <b>CRHTS6a</b>     | -1061.89974 | 32.1 | 0.06020 | 0.01610  | 92.8  | -1060.686784 |              |
| <b>HTS6a</b>       | -1061.88333 | 28.6 | 0.05443 | 0.01057  | 92.3  | -1060.671885 |              |
| <b>CPHTS6a</b>     | -1061.91233 | 31.6 | 0.06002 | 0.01326  | 98.4  | -1060.698465 |              |
| <b>Reaction 8</b>  |             |      |         |          |       |              |              |
| <b>CRHTS8a</b>     | -1061.90330 | 30.9 | 0.05877 | 0.01374  | 94.8  | -1060.689734 |              |
| <b>HTS8a</b>       | -1061.87470 | 26.6 | 0.05114 | 0.00762  | 91.6  | -1060.663794 |              |
| <b>CPHTS8a</b>     | -1061.91156 | 28.8 | 0.05636 | 0.00677  | 104.4 | -1060.70047  |              |
| <b>CRHTS8b</b>     | -1061.90330 | 30.9 | 0.05877 | 0.01374  | 94.8  | -1060.689734 |              |

|                |             |      |         |         |       |              |  |
|----------------|-------------|------|---------|---------|-------|--------------|--|
| <b>HTS8b</b>   | -1061.87535 | 26.6 | 0.05112 | 0.00776 | 91.3  | -1060.664699 |  |
| <b>CPHTS8b</b> | -1061.91156 | 28.8 | 0.05636 | 0.00677 | 104.4 | -1060.70047  |  |

**OH + CNSSH**

|                   |            |      |         |          |       |            |            |
|-------------------|------------|------|---------|----------|-------|------------|------------|
| <b>CHSH</b>       | -491.60527 | 11.0 | 0.02210 | -0.00711 | 61.5  | -491.02551 |            |
| <b>CNSSH</b>      | -889.80939 | 12.4 | 0.02546 | -0.00866 | 71.8  | -888.77166 | -888.77337 |
| <b>CNS</b>        | -490.97502 | 5.2  | 0.01234 | -0.01484 | 57.2  | -490.38769 | -490.38896 |
| <b>CNSOH</b>      | -566.79556 | 15.3 | 0.02964 | -0.00288 | 68.4  | -566.13903 | -566.14107 |
| <b>Reaction 1</b> |            |      |         |          |       |            |            |
| <b>CRFTS1a</b>    | -965.54556 | 19.1 | 0.03945 | -0.00383 | 91.1  | -964.42267 | -964.42436 |
| <b>FTS1a</b>      | -965.52867 | 20.4 | 0.03997 | 0.00093  | 82.2  | -964.41787 | -964.41962 |
| <b>CPFTS1a</b>    | -965.56628 | 20.8 | 0.04171 | -0.00254 | 93.1  | -964.44565 | -964.44671 |
| <b>CRFTS1b</b>    | -965.54888 | 19.1 | 0.03932 | -0.00398 | 91.1  | -964.42564 | -964.42739 |
| <b>FTS1b</b>      | -965.51952 | 20.4 | 0.04003 | 0.00005  | 84.1  | -964.40991 | -964.41182 |
| <b>CPFTS1b</b>    | -965.56628 | 20.8 | 0.04170 | -0.00257 | 93.2  | -964.44564 | -964.44671 |
| <b>CRBTS1b</b>    | -965.54568 | 18.6 | 0.03918 | -0.00673 |       | -964.42267 | -964.42436 |
| <b>BTS1b</b>      | -965.54169 | 19.9 | 0.03946 | -0.00082 | 84.8  | -964.42332 | -964.42380 |
| <b>CPBTS1b</b>    | -965.56627 | 20.7 | 0.04169 | -0.00289 | 93.8  | -964.44564 | -964.44671 |
| <b>CRB TS1a</b>   | -965.54888 | 19.0 | 0.03928 | -0.00449 | 92.1  | -964.42564 | -964.42739 |
| <b>BTS1a</b>      | -965.54292 | 19.8 | 0.03940 | -0.00110 | 85.2  | -964.42393 | -964.42445 |
| <b>CPBTS1a</b>    | -965.56627 | 20.7 | 0.04170 | -0.00291 | 93.9  | -964.44564 | -964.44671 |
| <b>Reaction 2</b> |            |      |         |          |       |            |            |
| <b>CRFTS2a</b>    | -965.55065 | 19.5 | 0.03972 | -0.00404 | 92.1  | -964.42630 | -964.42804 |
| <b>FTS2a</b>      | -965.52349 | 20.2 | 0.03967 | 0.00064  | 82.1  | -964.41419 | -964.41594 |
| <b>CPBTS2a</b>    | -965.55408 | 19.5 | 0.04065 | -0.00732 | 101.0 | -964.43537 | -964.43758 |
| <b>CRFTS2b</b>    | -965.54887 | 19.1 | 0.03931 | -0.00404 | 91.2  | -964.42564 | -964.42739 |
| <b>FTS2b</b>      | -965.52017 | 20.0 | 0.03942 | 0.00036  | 82.2  | -964.41103 | -964.41289 |
| <b>CPFTS2b</b>    | -965.55409 | 19.6 | 0.04066 | -0.00688 | 100.0 | -964.43543 | -964.43758 |
| <b>CRBTS2b</b>    | -965.55066 | 19.6 | 0.03973 | -0.00397 | 92.0  | -964.42632 | -964.42804 |

|                   |            |      |         |          |       |            |            |
|-------------------|------------|------|---------|----------|-------|------------|------------|
| <b>BTS2b</b>      | -965.53341 | 19.7 | 0.03919 | -0.00066 | 83.9  | -964.41954 | -964.42005 |
| <b>CPBTS2b</b>    | -965.55568 | 19.8 | 0.04072 | -0.00414 | 94.4  | -964.43765 | -964.43982 |
| <b>CRBTS2a</b>    | -965.55065 | 19.5 | 0.03972 | -0.00401 | 92.0  | -964.42632 | -964.42804 |
| <b>BTS2a</b>      | -965.53704 | 19.8 | 0.03919 | -0.00026 | 83.0  | -964.42217 | -964.42225 |
| <b>CPBTS2a</b>    | -965.55574 | 19.8 | 0.04073 | -0.00410 | 94.3  | -964.43776 | -964.43982 |
| <b>Reaction 3</b> |            |      |         |          |       |            |            |
| <b>CRHTS3b</b>    | -965.54888 | 19.1 | 0.03931 | -0.00404 | 91.2  | -964.42564 | -964.42739 |
| <b>HTS3b</b>      | -965.54012 | 17.5 | 0.03589 | -0.00549 | 87.1  | -964.41915 | -964.42067 |
| <b>CPHTS3b</b>    | -965.61199 | 21.7 | 0.04401 | -0.00099 | 94.7  | -964.49482 | -964.49674 |
| <b>CRHTS3a</b>    | -965.54888 | 19.1 | 0.03931 | -0.00404 | 91.2  | -964.42564 | -964.42739 |
| <b>HTS3a</b>      | -965.54106 | 17.5 | 0.03585 | -0.00541 | 86.8  | -964.42030 | -964.42200 |
| <b>CPHTS3a</b>    | -965.61199 |      |         |          |       |            |            |
|                   | -965.61199 | 21.7 | 0.04401 | -0.00099 | 94.7  | -964.49482 | -964.49674 |
|                   | -889.18745 | 6.7  | 0.01592 | -0.01802 | 71.4  | -888.14527 | -888.14693 |
| <b>Reaction 5</b> |            |      |         |          |       |            |            |
| <b>CRHTS5a</b>    | -965.57338 | 21.5 | 0.04188 | 0.00176  | 8.4   | -964.45514 |            |
| <b>HTS5a</b>      | -965.55286 | 17.5 | 0.03497 | -0.00400 | 82.0  | -964.43959 |            |
| <b>CPHTS5a</b>    | -965.57729 | 19.1 | 0.03897 | -0.00404 | 90.5  | -964.46167 |            |
| <b>Reaction 6</b> |            |      |         |          |       |            |            |
| <b>CRHTS6a</b>    | -965.57338 | 21.5 | 0.04188 | 0.00178  | 84.4  | -964.45515 |            |
| <b>HTS6a</b>      | -965.55057 | 18.1 | 0.03646 | -0.00375 | 84.6  | -964.43518 |            |
| <b>CPHTS6a</b>    | -965.57922 | 21.1 | 0.04230 | -0.00271 | 94.7  | -964.46041 |            |
| <b>Reaction 8</b> |            |      |         |          |       |            |            |
| <b>CRHTS8a</b>    | -965.56043 | 20.2 | 0.04084 | -0.00297 | 92.2  | -964.44276 |            |
| <b>HTS8a</b>      | -965.53197 | 15.9 | 0.03319 | -0.00792 | 86.5  | -964.41659 |            |
| <b>CPHTS8a</b>    | -965.57017 | 17.8 | 0.03822 | -0.01059 | 102.7 | -964.45579 |            |
| <b>CRHTS8b</b>    | -965.56044 | 20.2 | 0.04084 | -0.00297 | 92.2  | -964.44276 |            |
| <b>HTS8b</b>      | -965.53233 | 15.9 | 0.03319 | -0.00788 | 86.4  | -964.41707 |            |
| <b>CPHTS8b</b>    | -965.57017 | 17.8 | 0.03822 | -0.01059 | 102.7 | -964.45579 |            |



|  |  |  |  |  |  |  |  |
|--|--|--|--|--|--|--|--|
|  |  |  |  |  |  |  |  |
|--|--|--|--|--|--|--|--|

**OH + NO<sub>2</sub>SSH**

|                          |             |      |         |          |       |             |             |
|--------------------------|-------------|------|---------|----------|-------|-------------|-------------|
| <b>NO<sub>2</sub>SH</b>  | -603.82929  | 13.4 | 0.02589 | -0.00546 | 66.0  | -603.15949  |             |
| <b>NO<sub>2</sub>SO</b>  | -678.40936  | 9.9  | 0.02103 | -0.01290 | 71.4  | -677.66174  |             |
| <b>NO<sub>2</sub>SSH</b> | -1002.05363 | 15.1 | 0.03042 | -0.00597 | 76.6  | -1000.92587 | -1000.92789 |
| <b>NO<sub>2</sub></b>    | -205.03310  | 5.9  | 0.01322 | -0.01457 | 58.5  | -204.81465  | -204.81689  |
| <b>NO<sub>2</sub>S</b>   | -603.20211  | 7.9  | 0.01718 | -0.01484 | 67.4  | -602.52623  | -602.52812  |
| <b>Reaction 1</b>        |             |      |         |          |       |             |             |
| <b>CRBTS1b</b>           | -1077.78978 | 21.3 | 0.04414 | -0.00420 | 101.7 | -1076.57556 | -1076.57763 |
| <b>BTS1b</b>             | -1077.78140 | 22.8 | 0.04480 | 0.00252  | 89.0  | -1076.57618 | -1076.57695 |
| <b>CPBTS1b</b>           | -1077.79809 | 23.9 | 0.04701 | 0.00325  | 92.1  | -1076.58869 | -1076.59085 |
| <b>CRBTS1a</b>           | -1077.79303 | 21.8 | 0.04432 | -0.00141 | 96.2  | -1076.57967 | -1076.58169 |
| <b>BTS1a</b>             | -1077.78426 | 22.8 | 0.04462 | 0.00259  | 88.5  | -1076.57813 | -1076.57909 |
| <b>CPBTS1a</b>           | -1077.80414 | 24.2 | 0.04709 | 0.00412  | 90.4  | -1076.59449 | -1076.59654 |
| <b>CRFTS1b</b>           | -1077.79304 | 21.7 | 0.04335 | 0.00014  | 90.9  | -1076.57967 | -1076.58169 |
| <b>FTS1b</b>             | -1077.75683 | 22.8 | 0.04449 | 0.00305  | 87.2  | -1076.55721 | -1076.55949 |
| <b>CPFTS1b</b>           | -1077.79808 | 23.9 | 0.04700 | 0.00321  | 92.2  | -1076.58869 | -1076.59085 |
| <b>CRFTS1a</b>           | -1077.78912 | 21.7 | 0.04432 | -0.00175 | 97.0  | -1076.57462 | -1076.57519 |
| <b>FTS1a</b>             | -1077.76629 | 23.0 | 0.04488 | 0.00343  | 87.2  | -1076.56622 | -1076.56858 |
| <b>CPFTS1a</b>           | -1077.79808 | 23.9 | 0.04702 | 0.00320  | 92.2  | -1076.58869 | -1076.59085 |
| <b>Reaction 2</b>        |             |      |         |          |       |             |             |
| <b>CRBTS2a</b>           | -1077.79154 | 21.9 | 0.04439 | -0.00201 | 97.7  | -1076.57759 | -1076.57781 |
| <b>BTS2a</b>             | -1077.77144 | 22.2 | 0.04411 | 0.00149  | 87.7  | -1076.57120 | -1076.57283 |
| <b>CPBTS2a</b>           | -1077.80310 | 22.7 | 0.04585 | -0.00207 | 100.9 | -1076.59334 | -1076.59407 |
| <b>CRBTS2b</b>           | -1077.79064 | 21.6 | 0.04433 | -0.00210 | 97.7  | -1076.57807 | -1076.57769 |
| <b>BTS2b</b>             | -1077.77636 | 22.4 | 0.04418 | 0.00202  | 88.7  | -1076.57427 | -1076.57474 |
| <b>CPBTS2b</b>           | -1077.80311 | 22.7 | 0.04584 | -0.00224 | 101.2 | -1076.59334 | -1076.59407 |
| <b>Reaction 10</b>       |             |      |         |          |       |             |             |

|                   |             |      |         |          |       |             |             |
|-------------------|-------------|------|---------|----------|-------|-------------|-------------|
| <b>CRFTS10b</b>   | -1077.78887 | 21.5 | 0.04428 | -0.00356 | 100.7 | -1076.57624 | -1076.57998 |
| <b>FTS10b</b>     | -1077.77201 | 22.7 | 0.04459 | 0.00255  | 88.5  | -1076.57321 | -1076.57538 |
| <b>CPFTS10b</b>   | -1077.84027 | 22.5 | 0.04605 | -0.00475 | 106.9 | -1076.63094 | -1076.63436 |
| <b>CRFTS10a</b>   | -1077.79064 | 21.6 | 0.04433 | -0.00199 | 97.5  | -1076.57806 | -1076.57769 |
| <b>FTS10a</b>     | -1077.77230 | 22.5 | 0.04435 | 0.00210  | 88.9  | -1076.57376 | -1076.57593 |
| <b>CPFTS10a</b>   | -1077.83991 | 22.5 | 0.04608 | -0.00500 | 107.5 | -1076.62953 | -1076.63321 |
| <b>Reaction 3</b> |             |      |         |          |       |             |             |
| <b>CRHTS3b</b>    | -1077.79305 | 21.7 | 0.04335 | 0.00014  | 90.9  | -1076.57967 | -1076.58169 |
| <b>HTS3b</b>      | -1077.78474 | 20.2 | 0.04094 | -0.00281 | 92.1  | -1076.57383 | -1076.57565 |
| <b>CPHTS3b</b>    | -1077.85983 | 24.1 | 0.04884 | 0.00048  | 101.4 | -1076.65418 | -1076.65666 |
| <b>CRHTS3a</b>    | -1077.79305 | 21.7 | 0.04335 | 0.00014  | 90.9  | -1076.57967 | -1076.58169 |
| <b>HTS3a</b>      | -1077.78654 | 20.4 | 0.04098 | -0.00170 | 89.8  | -1076.57726 | -1076.57912 |
| <b>CPHTS3a</b>    | -1077.85983 | 24.1 | 0.04884 | 0.00048  | 101.4 | -1076.65418 | -1076.65666 |
| <b>Reaction 5</b> |             |      |         |          |       |             |             |
| <b>CRHTS5a</b>    | -1077.79547 | 23.5 | 0.04691 | -0.00065 | 100.1 | -1076.58563 |             |
| <b>HTS5a</b>      | -1077.77894 | 20.3 | 0.04056 | -0.00178 | 89.1  | -1076.57060 |             |
| <b>CPHTS5a</b>    | -1077.81290 | 21.9 | 0.04411 | 0.00132  | 95.6  | -1076.60484 |             |
| <b>Reaction 6</b> |             |      |         |          |       |             |             |
| <b>CRHTS6a</b>    | -1077.79798 | 24.0 | 0.04705 | 0.00332  | 92.0  | -1076.58934 |             |
| <b>HTS6a</b>      | -1077.78020 | 20.8 | 0.04173 | -0.00159 | 91.2  | -1076.57360 |             |
| <b>CPHTS6a</b>    | -1077.80806 | 23.5 | 0.04686 | 0.00012  | 98.4  | -1076.59813 |             |
| <b>Reaction 8</b> |             |      |         |          |       |             |             |
| <b>CRHTS8a</b>    | -1077.80919 | 22.9 | 0.04584 | 0.00044  | 95.6  | -1076.60044 |             |
| <b>HTS8a</b>      | -1077.78110 | 18.7 | 0.03843 | -0.00484 | 91.1  | -1076.57638 |             |
| <b>CPHTS8a</b>    | -1077.82450 | 20.6 | 0.04339 | -0.00635 | 104.7 | -1076.62095 |             |
| <b>CRHTS8b</b>    | -1077.80919 | 22.9 | 0.04584 | 0.00044  | 95.6  | -1076.60044 |             |
| <b>HTS8b</b>      | -1077.78180 | 18.8 | 0.03843 | -0.00461 | 90.6  | -1076.57724 |             |
| <b>CPHTS8b</b>    | -1077.82449 | 20.6 | 0.04339 | -0.00635 | 104.7 | -1076.62095 |             |

In table S6 we have collected the detail of the rate constants computed for all elementary reactions R1 to R12. Almost all rate constant calculations have been computed with conventional and variational transition state theory (VTST). However, there are few cases, either no relevant of because the reaction path is very flat and we could not get enough s points, in which only conventional transition state theory has been applied (TST). In general, conventional transition state theory rate constants are up to twice greater than variational transition state theory calculated values, although in some cases the differences raise up to five times.

**Table S6.** Calculated rate constants for all elementary reactions investigated in this work, computed at different temperatures (T in Kelvin). Keq stands for equilibrium constants (in  $\text{cm}^3 \cdot \text{molecule}^{-1}$ ); ktst and kcvt stand for conventional rate constants and canonic variational rate constants (in  $\text{s}^{-1}$ ), and kt stands for total rate constants (in  $\text{cm}^3 \cdot \text{molecule}^{-1} \cdot \text{s}^{-1}$ ). When applied, tunn stands for the tunneling correction, and for all VTST calculations, the s range considered is included as footnote.

### Reactions starting by HSSH + OH

#### FTS1a

| T      | Keq      | ktst      | kcvt     | kt       |
|--------|----------|-----------|----------|----------|
| 220.00 | 5.50e-22 | 4.930e+02 | 4.87e+02 | 2.68e-19 |
| 230.00 | 4.11e-22 | 1.220e+03 | 1.20e+03 | 4.94e-19 |
| 240.00 | 3.16e-22 | 2.780e+03 | 2.74e+03 | 8.67e-19 |
| 250.00 | 2.49e-22 | 5.940e+03 | 5.86e+03 | 1.46e-18 |
| 260.00 | 2.00e-22 | 1.200e+04 | 1.18e+04 | 2.36e-18 |
| 270.00 | 1.64e-22 | 2.290e+04 | 2.26e+04 | 3.71e-18 |
| 280.00 | 1.37e-22 | 4.170e+04 | 4.11e+04 | 5.63e-18 |
| 290.00 | 1.16e-22 | 7.290e+04 | 7.19e+04 | 8.33e-18 |
| 298.00 | 1.02e-22 | 1.110e+05 | 1.09e+05 | 1.12e-17 |
| 300.00 | 9.93e-23 | 1.230e+05 | 1.21e+05 | 1.20e-17 |
| 310.00 | 8.62e-23 | 2.000e+05 | 1.97e+05 | 1.70e-17 |
| 320.00 | 7.56e-23 | 3.150e+05 | 3.10e+05 | 2.34e-17 |

S :0.149,0.2988, 0.599, 0.899, 1.499, 2.099, 2.399, 2.999, 3.589, 4.499, at both sides of the IRC

#### FTS1b

| # T    | Keq      | ktst     | kcvt     | kt       |
|--------|----------|----------|----------|----------|
| 220.00 | 5.50e-22 | 4.93e+02 | 4.87e+02 | 2.68e-19 |
| 230.00 | 4.11e-22 | 1.22e+03 | 1.20e+03 | 4.94e-19 |
| 240.00 | 3.16e-22 | 2.78e+03 | 2.74e+03 | 8.67e-19 |
| 250.00 | 2.49e-22 | 5.94e+03 | 5.86e+03 | 1.46e-18 |
| 260.00 | 2.00e-22 | 1.20e+04 | 1.18e+04 | 2.36e-18 |
| 270.00 | 1.64e-22 | 2.29e+04 | 2.26e+04 | 3.71e-18 |

|        |          |          |          |          |
|--------|----------|----------|----------|----------|
| 280.00 | 1.37e-22 | 4.17e+04 | 4.11e+04 | 5.63e-18 |
| 290.00 | 1.16e-22 | 7.29e+04 | 7.19e+04 | 8.33e-18 |
| 298.00 | 1.02e-22 | 1.11e+05 | 1.09e+05 | 1.12e-17 |
| 300.00 | 9.93e-23 | 1.23e+05 | 1.21e+05 | 1.20e-17 |
| 310.00 | 8.62e-23 | 2.00e+05 | 1.97e+05 | 1.70e-17 |
| 320.00 | 7.56e-23 | 3.15e+05 | 3.10e+05 | 2.34e-17 |

S :0.149,0.2988, 0.599, 0.899, 1.499, 2.099, 2.399, 2.999, 3.589, 4.499, at both sides of the IRC

### BTS1a

| # T    | Keq      | ktst     | kcvt     | kt       |
|--------|----------|----------|----------|----------|
| 220.00 | 5.50e-22 | 1.40e+09 | 1.22e+09 | 6.70e-13 |
| 230.00 | 4.11e-22 | 1.65e+09 | 1.44e+09 | 5.92e-13 |
| 240.00 | 3.16e-22 | 1.92e+09 | 1.67e+09 | 5.28e-13 |
| 250.00 | 2.49e-22 | 2.20e+09 | 1.92e+09 | 4.78e-13 |
| 260.00 | 2.00e-22 | 2.50e+09 | 2.17e+09 | 4.35e-13 |
| 270.00 | 1.64e-22 | 2.81e+09 | 2.43e+09 | 3.99e-13 |
| 280.00 | 1.37e-22 | 3.12e+09 | 2.71e+09 | 3.71e-13 |
| 290.00 | 1.16e-22 | 3.45e+09 | 2.98e+09 | 3.45e-13 |
| 298.00 | 1.02e-22 | 3.71e+09 | 3.21e+09 | 3.29e-13 |
| 300.00 | 9.93e-23 | 3.78e+09 | 3.27e+09 | 3.25e-13 |
| 310.00 | 8.62e-23 | 4.11e+09 | 3.55e+09 | 3.06e-13 |
| 320.00 | 7.56e-23 | 4.46e+09 | 3.84e+09 | 2.90e-13 |

S :0.149,0.2988, 0.599, 0.899, 1.499, 2.099, 2.399, 2.999, 3.589, 4.499, at both sides of the IRC

### BTS1b

| # T    | Keq      | ktst     | kcvt     | kt       |
|--------|----------|----------|----------|----------|
| 220.00 | 5.50e-22 | 1.40e+09 | 1.22e+09 | 6.70e-13 |
| 230.00 | 4.11e-22 | 1.65e+09 | 1.44e+09 | 5.92e-13 |
| 240.00 | 3.16e-22 | 1.92e+09 | 1.67e+09 | 5.28e-13 |
| 250.00 | 2.49e-22 | 2.20e+09 | 1.92e+09 | 4.78e-13 |
| 260.00 | 2.00e-22 | 2.50e+09 | 2.17e+09 | 4.35e-13 |
| 270.00 | 1.64e-22 | 2.81e+09 | 2.43e+09 | 3.99e-13 |
| 280.00 | 1.37e-22 | 3.12e+09 | 2.71e+09 | 3.71e-13 |
| 290.00 | 1.16e-22 | 3.45e+09 | 2.98e+09 | 3.45e-13 |
| 298.00 | 1.02e-22 | 3.71e+09 | 3.21e+09 | 3.29e-13 |
| 300.00 | 9.93e-23 | 3.78e+09 | 3.27e+09 | 3.25e-13 |
| 310.00 | 8.62e-23 | 4.11e+09 | 3.55e+09 | 3.06e-13 |
| 320.00 | 7.56e-23 | 4.46e+09 | 3.84e+09 | 2.90e-13 |

S :0.149,0.2988, 0.599, 0.899, 1.499, 2.099, 2.399, 2.999, 3.589, 4.499, at both sides of the IRC

### HTS3a

| # T    | Keq      | tunn | ktst     | kcvt:    | kt       |
|--------|----------|------|----------|----------|----------|
| 220.00 | 5.50e-22 | 1.47 | 9.57e+10 | 8.07e+10 | 6.54e-11 |
| 230.00 | 4.11e-22 | 1.41 | 1.14e+11 | 9.91e+10 | 5.76e-11 |
| 240.00 | 3.16e-22 | 1.37 | 1.33e+11 | 1.20e+11 | 5.19e-11 |
| 250.00 | 2.49e-22 | 1.33 | 1.53e+11 | 1.42e+11 | 4.71e-11 |

|        |          |      |          |          |          |
|--------|----------|------|----------|----------|----------|
| 260.00 | 2.00e-22 | 0.81 | 1.75e+11 | 1.63e+11 | 2.65e-11 |
| 270.00 | 1.64e-22 | 0.81 | 1.98e+11 | 1.84e+11 | 2.45e-11 |
| 280.00 | 1.37e-22 | 0.81 | 2.22e+11 | 2.06e+11 | 2.27e-11 |
| 290.00 | 1.16e-22 | 0.80 | 2.47e+11 | 2.29e+11 | 2.13e-11 |
| 298.00 | 1.02e-22 | 0.80 | 2.67e+11 | 2.48e+11 | 2.04e-11 |
| 300.00 | 9.93e-23 | 0.81 | 2.73e+11 | 2.52e+11 | 2.02e-11 |
| 310.00 | 8.62e-23 | 0.80 | 2.99e+11 | 2.77e+11 | 1.91e-11 |
| 320.00 | 7.56e-23 | 0.80 | 3.26e+11 | 3.01e+11 | 1.83e-11 |

S= 0.204, 0.409, 0.818, 1.225, 1.634, 2.053, 2.452, 2.816, 3. 271, 3.925 at both sides of the IRC

### HTS3b

| # T    | Keq      | tunn | ktst     | kcvt     | kt       |
|--------|----------|------|----------|----------|----------|
| 220.00 | 6.92e-22 | 1.30 | 1.19e+11 | 9.82e+10 | 8.86e-11 |
| 230.00 | 5.79e-22 | 1.27 | 1.23e+11 | 1.05e+11 | 7.70e-11 |
| 240.00 | 4.93e-22 | 1.23 | 1.28e+11 | 1.11e+11 | 6.76e-11 |
| 250.00 | 4.27e-22 | 1.21 | 1.32e+11 | 1.17e+11 | 6.02e-11 |
| 260.00 | 3.75e-22 | 1.19 | 1.35e+11 | 1.22e+11 | 5.44e-11 |
| 270.00 | 3.33e-22 | 1.16 | 1.39e+11 | 1.28e+11 | 4.97e-11 |
| 280.00 | 3.00e-22 | 1.15 | 1.42e+11 | 1.33e+11 | 4.59e-11 |
| 290.00 | 2.72e-22 | 1.13 | 1.45e+11 | 1.38e+11 | 4.25e-11 |
| 298.00 | 2.54e-22 | 0.82 | 1.47e+11 | 1.40e+11 | 2.92e-11 |
| 300.00 | 2.50e-22 | 0.82 | 1.48e+11 | 1.41e+11 | 2.87e-11 |
| 310.00 | 2.31e-22 | 0.82 | 1.50e+11 | 1.43e+11 | 2.70e-11 |
| 320.00 | 2.15e-22 | 0.82 | 1.53e+11 | 1.45e+11 | 2.55e-11 |

S=0124, 0.207, 0.623, 0.830, 1.038, 1,243, 1.451, 2.074, 2.489, 2.904, 3.734, 4.564, 6.224 , - 0124, -0.207,- 0.623, -0.830, 1.038, -1,243, -1.451, -2.074, -2.489

### PTS3a

| # T    | Keq      | tunn    | ktst     | kcvt     | kt       |
|--------|----------|---------|----------|----------|----------|
| 220.00 | 5.50e-22 | 1067.57 | 3.74e+06 | 3.70e+06 | 2.17e-12 |
| 230.00 | 4.11e-22 | 653.97  | 6.36e+06 | 6.30e+06 | 1.69e-12 |
| 240.00 | 3.16e-22 | 422.55  | 1.03e+07 | 1.02e+07 | 1.36e-12 |
| 250.00 | 2.49e-22 | 281.88  | 1.62e+07 | 1.60e+07 | 1.12e-12 |
| 260.00 | 2.00e-22 | 195.45  | 2.44e+07 | 2.42e+07 | 9.48e-13 |
| 270.00 | 1.64e-22 | 140.23  | 3.56e+07 | 3.53e+07 | 8.13e-13 |
| 280.00 | 1.37e-22 | 103.59  | 5.07e+07 | 5.02e+07 | 7.12e-13 |
| 290.00 | 1.16e-22 | 78.19   | 7.03e+07 | 6.97e+07 | 6.31e-13 |
| 298.00 | 1.02e-22 | 63.71   | 8.98e+07 | 8.90e+07 | 5.80e-13 |
| 300.00 | 9.93e-23 | 60.63   | 9.53e+07 | 9.45e+07 | 5.69e-13 |
| 310.00 | 8.62e-23 | 47.70   | 1.27e+08 | 1.26e+08 | 5.18e-13 |
| 320.00 | 7.56e-23 | 38.54   | 1.65e+08 | 1.64e+08 | 4.78e-13 |

S= 0.150, 0.300, 0.600, -0.150, -0.300, -0.600, -0.900, -1.500

### Reverse BTS1a

| # T    | Keq      | ktst     | kcvt     | kt       |
|--------|----------|----------|----------|----------|
| 220.00 | 1.01e-22 | 4.17e+03 | 3.69e+03 | 3.72e-19 |
| 230.00 | 7.04e-23 | 1.08e+04 | 9.49e+03 | 6.68e-19 |
| 240.00 | 5.07e-23 | 2.57e+04 | 2.26e+04 | 1.15e-18 |

|        |          |          |          |          |
|--------|----------|----------|----------|----------|
| 250.00 | 3.76e-23 | 5.72e+04 | 5.03e+04 | 1.89e-18 |
| 260.00 | 2.86e-23 | 1.20e+05 | 1.05e+05 | 3.01e-18 |
| 270.00 | 2.23e-23 | 2.38e+05 | 2.09e+05 | 4.66e-18 |
| 280.00 | 1.77e-23 | 4.51e+05 | 3.94e+05 | 6.98e-18 |
| 290.00 | 1.43e-23 | 8.16e+05 | 7.14e+05 | 1.02e-17 |
| 298.00 | 1.22e-23 | 1.28e+06 | 1.11e+06 | 1.36e-17 |
| 300.00 | 1.18e-23 | 1.42e+06 | 1.24e+06 | 1.46e-17 |
| 310.00 | 9.82e-24 | 2.39e+06 | 2.09e+06 | 2.05e-17 |
| 320.00 | 8.30e-24 | 3.89e+06 | 3.39e+06 | 2.81e-17 |

S :0.149,0.2988, 0.599, 0.899, 1.499, 2.099, 2.399, 2.999, 3.589, 4.499, at both sides of the IRC

### Reverse BTS1b

| # T    | Keq    | ktst     | kcvt     | kt       |
|--------|--------|----------|----------|----------|
| 220.00 | 1e-222 | 4.17e+03 | 3.69e+03 | 3.72e-19 |
| 230.00 | 7e-232 | 1.08e+04 | 9.49e+03 | 6.68e-19 |
| 240.00 | 5e-232 | 2.57e+04 | 2.26e+04 | 1.15e-18 |
| 250.00 | 4e-232 | 5.72e+04 | 5.03e+04 | 1.89e-18 |
| 260.00 | 3e-232 | 1.20e+05 | 1.05e+05 | 3.01e-18 |
| 270.00 | 2e-232 | 2.38e+05 | 2.09e+05 | 4.66e-18 |
| 280.00 | 2e-232 | 4.51e+05 | 3.94e+05 | 6.98e-18 |
| 290.00 | 1e-232 | 8.16e+05 | 7.14e+05 | 1.02e-17 |
| 298.00 | 1e-232 | 1.28e+06 | 1.11e+06 | 1.36e-17 |
| 300.00 | 1e-232 | 1.42e+06 | 1.24e+06 | 1.46e-17 |
| 310.00 | 1e-232 | 2.39e+06 | 2.09e+06 | 2.05e-17 |
| 320.00 | 8e-242 | 3.89e+06 | 3.39e+06 | 2.81e-17 |

S :0.149,0.2988, 0.599, 0.899, 1.499, 2.099, 2.399, 2.999, 3.589, 4.499, at both sides of the IRC

### HTS5a

| # T    | Keq      | tunn   | ktst     | kcvt: kt |          |
|--------|----------|--------|----------|----------|----------|
| 220.00 | 8.55e-21 | 576.20 | 1.24e+03 | 6.89e+02 | 3.40e-15 |
| 230.00 | 5.13e-21 | 353.12 | 3.44e+03 | 1.92e+03 | 3.48e-15 |
| 240.00 | 3.22e-21 | 230.14 | 8.72e+03 | 4.91e+03 | 3.63e-15 |
| 250.00 | 2.10e-21 | 156.41 | 2.06e+04 | 1.17e+04 | 3.84e-15 |
| 260.00 | 1.42e-21 | 111.92 | 4.54e+04 | 2.60e+04 | 4.13e-15 |
| 270.00 | 9.89e-22 | 82.72  | 9.47e+04 | 5.44e+04 | 4.45e-15 |
| 280.00 | 7.09e-22 | 63.24  | 1.87e+05 | 1.08e+05 | 4.84e-15 |
| 290.00 | 5.21e-22 | 49.03  | 3.54e+05 | 2.06e+05 | 5.26e-15 |
| 298.00 | 4.14e-22 | 41.14  | 5.71e+05 | 3.33e+05 | 5.67e-15 |
| 300.00 | 3.92e-22 | 39.57  | 6.42e+05 | 3.74e+05 | 5.80e-15 |
| 310.00 | 3.00e-22 | 32.16  | 1.12e+06 | 6.56e+05 | 6.34e-15 |
| 320.00 | 2.35e-22 | 26.76  | 1.89e+06 | 1.11e+06 | 6.97e-15 |

S=0.156, 0.313, 0.469, 0.625, 0.938, 1.250, 1.813, -0.156, -0.313, -0.469, -0.625, -0.938, -1.250, 1.813, -2.500, -3.438, -4.376

### HTS5b

| # T | Keq | tunn | ktst | kcvt | kt |  |
|-----|-----|------|------|------|----|--|
|-----|-----|------|------|------|----|--|

|        |          |        |          |          |          |
|--------|----------|--------|----------|----------|----------|
| 220.00 | 3.39e-21 | 371.76 | 2.90e+03 | 2.16e+03 | 2.73e-15 |
| 230.00 | 2.15e-21 | 233.74 | 7.61e+03 | 5.69e+03 | 2.86e-15 |
| 240.00 | 1.42e-21 | 155.07 | 1.84e+04 | 1.38e+04 | 3.04e-15 |
| 250.00 | 9.73e-22 | 107.99 | 4.16e+04 | 3.13e+04 | 3.29e-15 |
| 260.00 | 6.87e-22 | 78.31  | 8.83e+04 | 6.64e+04 | 3.57e-15 |
| 270.00 | 4.99e-22 | 58.58  | 1.77e+05 | 1.34e+05 | 3.92e-15 |
| 280.00 | 3.72e-22 | 45.31  | 3.39e+05 | 2.56e+05 | 4.32e-15 |
| 290.00 | 2.83e-22 | 35.90  | 6.20e+05 | 4.68e+05 | 4.76e-15 |
| 298.00 | 2.31e-22 | 30.35  | 9.77e+05 | 7.38e+05 | 5.18e-15 |
| 300.00 | 2.20e-22 | 29.13  | 1.09e+06 | 8.24e+05 | 5.29e-15 |
| 310.00 | 1.74e-22 | 24.00  | 1.85e+06 | 1.40e+06 | 5.86e-15 |
| 320.00 | 1.40e-22 | 20.13  | 3.04e+06 | 2.30e+06 | 6.50e-15 |

S=0.156, 0.313, 0.469, 0.625, 0.938, 1.250, 1.813, 2.503, 3.441, 4,380, -0.156, -0.313, -0.469, -0.625, -0.938, -1.250, 1.813, -2.500, -3.438,-4.376

### HTS6a

| # T    | Keq      | tunn | ktst     | kcvt: kt |          |
|--------|----------|------|----------|----------|----------|
| 220.00 | 3.35e-23 | 1.32 | 1.41e+10 | 5.89e+09 | 2.61e-13 |
| 230.00 | 2.78e-23 | 1.27 | 1.77e+10 | 7.78e+09 | 2.76e-13 |
| 240.00 | 2.36e-23 | 1.24 | 2.17e+10 | 1.00e+10 | 2.92e-13 |
| 250.00 | 2.03e-23 | 1.20 | 2.63e+10 | 1.27e+10 | 3.08e-13 |
| 260.00 | 1.77e-23 | 1.17 | 3.15e+10 | 1.57e+10 | 3.26e-13 |
| 270.00 | 1.57e-23 | 1.15 | 3.71e+10 | 1.92e+10 | 3.45e-13 |
| 280.00 | 1.40e-23 | 1.13 | 4.32e+10 | 2.31e+10 | 3.64e-13 |
| 290.00 | 1.27e-23 | 1.10 | 4.99e+10 | 2.75e+10 | 3.84e-13 |
| 298.00 | 1.18e-23 | 1.09 | 5.56e+10 | 3.12e+10 | 4.00e-13 |
| 300.00 | 1.16e-23 | 1.09 | 5.70e+10 | 3.22e+10 | 4.05e-13 |
| 310.00 | 1.06e-23 | 1.07 | 6.47e+10 | 3.75e+10 | 4.26e-13 |
| 320.00 | 9.85e-24 | 1.06 | 7.28e+10 | 4.31e+10 | 4.49e-13 |

S= 0.155, 0.308, 0.462, 0.615, 0.922, 1.230, 1.784, 2.461, 2.923, -0.155, -0.308, -0.462, -0.615, -0.922, -1.230, -1.784, -2.461, -3.380, -4.300

### HTS6b

| T      | Keq      | tunn | ktst     | kcvt     | kt       |  |
|--------|----------|------|----------|----------|----------|--|
| 220.00 | 8.55e-21 | 1.43 | 3.39e+07 | 1.68e+07 | 2.06e-13 |  |
| 230.00 | 5.13e-21 | 1.37 | 6.02e+07 | 3.13e+07 | 2.20e-13 |  |
| 240.00 | 3.22e-21 | 1.32 | 1.02e+08 | 5.55e+07 | 2.35e-13 |  |
| 250.00 | 2.10e-21 | 1.27 | 1.66e+08 | 9.39e+07 | 2.50e-13 |  |
| 260.00 | 1.42e-21 | 1.23 | 2.60e+08 | 1.53e+08 | 2.67e-13 |  |
| 270.00 | 9.89e-22 | 1.20 | 3.95e+08 | 2.40e+08 | 2.84e-13 |  |
| 280.00 | 7.09e-22 | 1.16 | 5.83e+08 | 3.65e+08 | 3.01e-13 |  |
| 290.00 | 5.21e-22 | 1.14 | 8.38e+08 | 5.39e+08 | 3.20e-13 |  |
| 298.00 | 4.14e-22 | 1.12 | 1.10e+09 | 7.23e+08 | 3.36e-13 |  |
| 300.00 | 3.92e-22 | 1.12 | 1.18e+09 | 7.76e+08 | 3.40e-13 |  |
| 310.00 | 3.00e-22 | 1.10 | 1.62e+09 | 1.09e+09 | 3.61e-13 |  |
| 320.00 | 2.35e-22 | 1.08 | 2.18e+09 | 1.51e+09 | 3.83e-13 |  |

S= 0.155, 0.308, 0.462, 0.615, 0.922, 1.230, 1.784, 2.460, 3.380,4.302, -0.155, -0.308, -0.462, -0.615, -0.922, -1.230, -1.784, -2.461, -3.380, -4.300

### Reactions starting by HSSCH<sub>3</sub> + OH

#### BTS1a

| T      | Keq      | ktst     | kt       |
|--------|----------|----------|----------|
| 220.00 | 3.68e-22 | 5.34e+10 | 1.97e-11 |
| 230.00 | 3.21e-22 | 5.43e+10 | 1.75e-11 |
| 240.00 | 2.84e-22 | 5.50e+10 | 1.56e-11 |
| 250.00 | 2.55e-22 | 5.56e+10 | 1.42e-11 |
| 260.00 | 2.32e-22 | 5.62e+10 | 1.30e-11 |
| 270.00 | 2.12e-22 | 5.65e+10 | 1.20e-11 |
| 280.00 | 1.97e-22 | 5.69e+10 | 1.12e-11 |
| 290.00 | 1.83e-22 | 5.72e+10 | 1.05e-11 |
| 298.00 | 1.74e-22 | 5.74e+10 | 1.00e-11 |
| 300.00 | 1.72e-22 | 5.75e+10 | 9.91e-12 |
| 310.00 | 1.63e-22 | 5.76e+10 | 9.39e-12 |
| 320.00 | 1.55e-22 | 5.78e+10 | 8.96e-12 |

Calculated at conventional TST only

#### Reverse BTS1a

| T      | Keq      | kTST     | kt       |
|--------|----------|----------|----------|
| 220.00 | 1.53e-23 | 8.43e+04 | 1.29e-18 |
| 230.00 | 1.11e-23 | 1.86e+05 | 2.06e-18 |
| 240.00 | 8.30e-24 | 3.86e+05 | 3.20e-18 |
| 250.00 | 6.38e-24 | 7.54e+05 | 4.81e-18 |
| 260.00 | 5.03e-24 | 1.40e+06 | 7.04e-18 |
| 270.00 | 4.04e-24 | 2.49e+06 | 1.01e-17 |
| 280.00 | 3.31e-24 | 4.25e+06 | 1.41e-17 |
| 290.00 | 2.76e-24 | 6.99e+06 | 1.93e-17 |
| 298.00 | 2.41e-24 | 1.02e+07 | 2.46e-17 |
| 300.00 | 2.34e-24 | 1.11e+07 | 2.59e-17 |
| 310.00 | 2.00e-24 | 1.72e+07 | 3.45e-17 |
| 320.00 | 1.74e-24 | 2.60e+07 | 4.52e-17 |

Calculated at conventional TST only

#### BTS1b

| T      | Keq      | ktst     | kt       |
|--------|----------|----------|----------|
| 220.00 | 5.05e-22 | 3.46e+11 | 1.75e-10 |
| 230.00 | 4.05e-22 | 3.42e+11 | 1.39e-10 |
| 240.00 | 3.33e-22 | 3.38e+11 | 1.12e-10 |
| 250.00 | 2.78e-22 | 3.35e+11 | 9.30e-11 |
| 260.00 | 2.36e-22 | 3.31e+11 | 7.82e-11 |
| 270.00 | 2.04e-22 | 3.27e+11 | 6.67e-11 |
| 280.00 | 1.78e-22 | 3.24e+11 | 5.77e-11 |
| 290.00 | 1.58e-22 | 3.20e+11 | 5.05e-11 |
| 298.00 | 1.44e-22 | 3.18e+11 | 4.58e-11 |
| 300.00 | 1.41e-22 | 3.17e+11 | 4.47e-11 |



|        |          |          |          |
|--------|----------|----------|----------|
| 310.00 | 1.27e-22 | 3.14e+11 | 3.99e-11 |
| 320.00 | 1.16e-22 | 3.11e+11 | 3.60e-11 |

Calculated at conventional TST only

### Reverse BTS1B

| # T    | Keq      | kTST     | kt       |
|--------|----------|----------|----------|
| 220.00 | 3.12e-24 | 3.77e+06 | 1.18e-17 |
| 230.00 | 2.40e-24 | 7.02e+06 | 1.69e-17 |
| 240.00 | 1.90e-24 | 1.24e+07 | 2.35e-17 |
| 250.00 | 1.54e-24 | 2.11e+07 | 3.24e-17 |
| 260.00 | 1.27e-24 | 3.42e+07 | 4.33e-17 |
| 270.00 | 1.06e-24 | 5.38e+07 | 5.72e-17 |
| 280.00 | 9.08e-25 | 8.18e+07 | 7.43e-17 |
| 290.00 | 7.86e-25 | 1.21e+08 | 9.51e-17 |
| 298.00 | 7.06e-25 | 1.62e+08 | 1.14e-16 |
| 300.00 | 6.89e-25 | 1.74e+08 | 1.20e-16 |
| 310.00 | 6.10e-25 | 2.45e+08 | 1.50e-16 |
| 320.00 | 5.46e-25 | 3.38e+08 | 1.85e-16 |

Calculated at conventional TST only

### FTS1a

| T      | Keq      | ktst     | kcvt     | kt       |
|--------|----------|----------|----------|----------|
| 220.00 | 5.05e-22 | 7.43e+00 | 5.93e+00 | 2.99e-21 |
| 230.00 | 4.05e-22 | 2.08e+01 | 1.67e+01 | 6.77e-21 |
| 240.00 | 3.33e-22 | 5.33e+01 | 4.30e+01 | 1.43e-20 |
| 250.00 | 2.78e-22 | 1.27e+02 | 1.03e+02 | 2.86e-20 |
| 260.00 | 2.36e-22 | 2.81e+02 | 2.29e+02 | 5.41e-20 |
| 270.00 | 2.04e-22 | 5.88e+02 | 4.81e+02 | 9.81e-20 |
| 280.00 | 1.78e-22 | 1.16e+03 | 9.56e+02 | 1.70e-19 |
| 290.00 | 1.58e-22 | 2.20e+03 | 1.81e+03 | 2.86e-19 |
| 298.00 | 1.44e-22 | 3.54e+03 | 2.93e+03 | 4.22e-19 |
| 300.00 | 1.41e-22 | 3.98e+03 | 3.29e+03 | 4.64e-19 |
| 310.00 | 1.27e-22 | 6.91e+03 | 5.73e+03 | 7.29e-19 |
| 320.00 | 1.16e-22 | 1.16e+04 | 9.65e+03 | 1.12e-18 |

S= 0.285, 0.571, 1.142, 1.714, 2.855, 3.997, 4.568, 5.170,,6.851, 7.708, -0.428, -0.856,-1.713, -2.569, -4.283, -5.995, -6.852, -8.563

### FTS1b

| T      | Keq      | ktst     | kcvt     | kt       |
|--------|----------|----------|----------|----------|
| 220.00 | 3.68e-22 | 6.53e+04 | 6.33e+04 | 2.33e-17 |
| 230.00 | 3.21e-22 | 1.17e+05 | 1.14e+05 | 3.66e-17 |
| 240.00 | 2.84e-22 | 2.00e+05 | 1.94e+05 | 5.52e-17 |
| 250.00 | 2.55e-22 | 3.27e+05 | 3.17e+05 | 8.09e-17 |
| 260.00 | 2.32e-22 | 5.13e+05 | 4.98e+05 | 1.15e-16 |
| 270.00 | 2.12e-22 | 7.78e+05 | 7.56e+05 | 1.61e-16 |
| 280.00 | 1.97e-22 | 1.14e+06 | 1.11e+06 | 2.18e-16 |
| 290.00 | 1.83e-22 | 1.63e+06 | 1.59e+06 | 2.92e-16 |
| 298.00 | 1.74e-22 | 2.14e+06 | 2.08e+06 | 3.63e-16 |
| 300.00 | 1.72e-22 | 2.28e+06 | 2.22e+06 | 3.83e-16 |

|        |          |          |          |          |
|--------|----------|----------|----------|----------|
| 310.00 | 1.63e-22 | 3.11e+06 | 3.03e+06 | 4.94e-16 |
| 320.00 | 1.55e-22 | 4.16e+06 | 4.05e+06 | 6.28e-16 |

S= 0.374 0.747, 1.494, 2.242, 3.736, 5.230, 5.753, -0.374, -0.742, -1.494, -2.242, -3.736, -5.230, -5.997, -6.724

### BTS2a

| T      | Keq      | ktst     | kcvt     | kt       |
|--------|----------|----------|----------|----------|
| 220.00 | 9.80e-20 | 1.42e+11 | 1.19e+11 | 1.17e-08 |
| 230.00 | 5.78e-20 | 1.56e+11 | 1.31e+11 | 7.58e-09 |
| 240.00 | 3.58e-20 | 1.70e+11 | 1.42e+11 | 5.08e-09 |
| 250.00 | 2.31e-20 | 1.84e+11 | 1.53e+11 | 3.53e-09 |
| 260.00 | 1.54e-20 | 1.97e+11 | 1.65e+11 | 2.54e-09 |
| 270.00 | 1.06e-20 | 2.11e+11 | 1.76e+11 | 1.87e-09 |
| 280.00 | 7.56e-21 | 2.25e+11 | 1.87e+11 | 1.41e-09 |
| 290.00 | 5.51e-21 | 2.38e+11 | 1.97e+11 | 1.09e-09 |
| 298.00 | 4.36e-21 | 2.48e+11 | 2.06e+11 | 8.97e-10 |
| 300.00 | 4.12e-21 | 2.51e+11 | 2.08e+11 | 8.56e-10 |
| 310.00 | 3.14e-21 | 2.64e+11 | 2.18e+11 | 6.84e-10 |
| 320.00 | 2.44e-21 | 2.76e+11 | 2.28e+11 | 5.55e-10 |

S= 0.144, 0.294, 0.593, 0.893, 1.492, 2.096, 2.390, 2.989, 3.579, 4,452, -0.145, -0.295, -0.594, -0.894, -1.494, -2.094, -2.394, -2.994, -3.594, -4.493

### Reverse BTS2a

| # T    | Keq      | ktst     | kt       |
|--------|----------|----------|----------|
| 220.00 | 3.87e-20 | 1.88e+03 | 7.27e-17 |
| 230.00 | 2.25e-20 | 4.76e+03 | 1.07e-16 |
| 240.00 | 1.38e-20 | 1.12e+04 | 1.54e-16 |
| 250.00 | 8.80e-21 | 2.45e+04 | 2.16e-16 |
| 260.00 | 5.83e-21 | 5.05e+04 | 2.94e-16 |
| 270.00 | 3.99e-21 | 9.87e+04 | 3.94e-16 |
| 280.00 | 2.82e-21 | 1.84e+05 | 5.18e-16 |
| 290.00 | 2.04e-21 | 3.29e+05 | 6.71e-16 |
| 298.00 | 1.60e-21 | 5.10e+05 | 8.18e-16 |
| 300.00 | 1.51e-21 | 5.66e+05 | 8.57e-16 |
| 310.00 | 1.15e-21 | 9.41e+05 | 1.08e-15 |
| 320.00 | 8.87e-22 | 1.52e+06 | 1.35e-15 |

Calculated at conventional TST only

### BTS2b

| T      | Keq      | ktst     | kcvt     | kt       |
|--------|----------|----------|----------|----------|
| 220.00 | 9.44e-19 | 1.86e+11 | 1.39e+11 | 1.31e-07 |
| 230.00 | 4.85e-19 | 2.08e+11 | 1.55e+11 | 7.52e-08 |
| 240.00 | 2.64e-19 | 2.30e+11 | 1.71e+11 | 4.52e-08 |
| 250.00 | 1.51e-19 | 2.53e+11 | 1.87e+11 | 2.83e-08 |
| 260.00 | 9.08e-20 | 2.75e+11 | 2.03e+11 | 1.84e-08 |
| 270.00 | 5.67e-20 | 2.98e+11 | 2.19e+11 | 1.24e-08 |
| 280.00 | 3.67e-20 | 3.21e+11 | 2.35e+11 | 8.62e-09 |
| 290.00 | 2.45e-20 | 3.43e+11 | 2.51e+11 | 6.15e-09 |

|        |          |          |          |          |
|--------|----------|----------|----------|----------|
| 298.00 | 1.81e-20 | 3.61e+11 | 2.63e+11 | 4.77e-09 |
| 300.00 | 1.69e-20 | 3.66e+11 | 2.66e+11 | 4.49e-09 |
| 310.00 | 1.19e-20 | 3.88e+11 | 2.82e+11 | 3.36e-09 |
| 320.00 | 8.61e-21 | 4.10e+11 | 2.97e+11 | 2.56e-09 |

S= 0.144, 0.294, 0.593, 0.893, 1.492, 2.096, 2.390, 2.989, 3.579, 4,452, -0.145, -0.295, -0.594, -0.894, -1.494, -2.094, -2.394, -2.994, -3.594, -4.493

### Reverse BTS2b

| # T    | Keq      | ktst     | kt       |
|--------|----------|----------|----------|
| 220.00 | 2.87e-21 | 3.10e+05 | 8.89e-16 |
| 230.00 | 2.02e-21 | 5.78e+05 | 1.16e-15 |
| 240.00 | 1.46e-21 | 1.02e+06 | 1.49e-15 |
| 250.00 | 1.09e-21 | 1.73e+06 | 1.89e-15 |
| 260.00 | 8.39e-22 | 2.80e+06 | 2.35e-15 |
| 270.00 | 6.59e-22 | 4.39e+06 | 2.89e-15 |
| 280.00 | 5.27e-22 | 6.65e+06 | 3.51e-15 |
| 290.00 | 4.30e-22 | 9.80e+06 | 4.21e-15 |
| 298.00 | 3.69e-22 | 1.31e+07 | 4.84e-15 |
| 300.00 | 3.56e-22 | 1.41e+07 | 5.02e-15 |
| 310.00 | 2.99e-22 | 1.97e+07 | 5.89e-15 |
| 320.00 | 2.55e-22 | 2.71e+07 | 6.90e-15 |

Calculated at conventional TST only

### FTS2a

| T      | Keq      | ktst     | kcvt     | kt       |
|--------|----------|----------|----------|----------|
| 220.00 | 9.34e-19 | 8.27e+03 | 3.24e+03 | 3.03e-15 |
| 230.00 | 4.81e-19 | 1.93e+04 | 7.72e+03 | 3.71e-15 |
| 240.00 | 2.62e-19 | 4.19e+04 | 1.71e+04 | 4.48e-15 |
| 250.00 | 1.50e-19 | 8.55e+04 | 3.56e+04 | 5.36e-15 |
| 260.00 | 9.03e-20 | 1.65e+05 | 7.00e+04 | 6.32e-15 |
| 270.00 | 5.65e-20 | 3.04e+05 | 1.31e+05 | 7.40e-15 |
| 280.00 | 3.66e-20 | 5.35e+05 | 2.34e+05 | 8.56e-15 |
| 290.00 | 2.45e-20 | 9.06e+05 | 4.01e+05 | 9.81e-15 |
| 298.00 | 1.81e-20 | 1.35e+06 | 6.01e+05 | 1.09e-14 |
| 300.00 | 1.68e-20 | 1.48e+06 | 6.63e+05 | 1.12e-14 |
| 310.00 | 1.19e-20 | 2.34e+06 | 1.06e+06 | 1.26e-14 |
| 320.00 | 8.61e-21 | 3.61e+06 | 1.65e+06 | 1.42e-14 |

S=0.285, 0.571, 1.142, 1.713, 2.855, 3.997, 4.568, 5.710, 6.852, 7.708, -0.428, -0.756, -1,713, -2.569, -4.282, -5.995, -6.851, -8.563.

### FTS2b

| T      | Keq      | ktst     | kcvt     | kt       |
|--------|----------|----------|----------|----------|
| 220.00 | 3.58e-20 | 4.17e+08 | 1.87e+08 | 6.70e-12 |
| 230.00 | 2.05e-20 | 6.22e+08 | 2.90e+08 | 5.94e-12 |
| 240.00 | 1.23e-20 | 9.00e+08 | 4.34e+08 | 5.33e-12 |
| 250.00 | 7.70e-21 | 1.26e+09 | 6.29e+08 | 4.84e-12 |
| 260.00 | 5.00e-21 | 1.73e+09 | 8.84e+08 | 4.42e-12 |
| 270.00 | 3.36e-21 | 2.31e+09 | 1.21e+09 | 4.07e-12 |

|        |          |          |          |          |
|--------|----------|----------|----------|----------|
| 280.00 | 2.33e-21 | 3.03e+09 | 1.63e+09 | 3.80e-12 |
| 290.00 | 1.66e-21 | 3.90e+09 | 2.14e+09 | 3.54e-12 |
| 298.00 | 1.28e-21 | 4.71e+09 | 2.63e+09 | 3.37e-12 |
| 300.00 | 1.21e-21 | 4.94e+09 | 2.76e+09 | 3.33e-12 |

S= 0.531, 1.063, 2.127, 3.190, -0.531, -1.063, -2.127, -3.190, -4.784, -4.889

### HTS3a

| T      | Keq      | tunn | ktst     | kcvt     | kt       |
|--------|----------|------|----------|----------|----------|
| 220.00 | 9.78e-19 | 6.05 | 4.35e+07 | 4.28e+07 | 2.53e-10 |
| 230.00 | 5.02e-19 | 5.36 | 7.33e+07 | 7.22e+07 | 1.94e-10 |
| 240.00 | 2.73e-19 | 4.81 | 1.18e+08 | 1.16e+08 | 1.53e-10 |
| 250.00 | 1.57e-19 | 4.34 | 1.84e+08 | 1.81e+08 | 1.23e-10 |
| 260.00 | 9.39e-20 | 3.97 | 2.76e+08 | 2.72e+08 | 1.01e-10 |
| 270.00 | 5.86e-20 | 3.66 | 4.02e+08 | 3.96e+08 | 8.50e-11 |
| 280.00 | 3.79e-20 | 3.39 | 5.69e+08 | 5.61e+08 | 7.20e-11 |
| 290.00 | 2.53e-20 | 3.17 | 7.88e+08 | 7.77e+08 | 6.23e-11 |
| 298.00 | 1.87e-20 | 3.01 | 1.01e+09 | 9.93e+08 | 5.60e-11 |
| 300.00 | 1.74e-20 | 2.98 | 1.07e+09 | 1.05e+09 | 5.45e-11 |
| 310.00 | 1.23e-20 | 2.81 | 1.42e+09 | 1.40e+09 | 4.83e-11 |
| 320.00 | 8.88e-21 | 2.66 | 1.85e+09 | 1.83e+09 | 4.32e-11 |

S=0.154, 0.307, 0.461, 0.617, 0.773, 0.987, 1.085, 1.239, 1.,387, 1,535, 2.312, 3.090, 4.024, -0.155, -0.311, -0467, -0.622

### HTS3b

| T      | Keq      | tunn | ktst     | kcvt     | kt       |
|--------|----------|------|----------|----------|----------|
| 220.00 | 5.05e-22 | 1.27 | 1.59e+12 | 1.59e+12 | 1.02e-09 |
| 230.00 | 4.05e-22 | 1.25 | 1.67e+12 | 1.67e+12 | 8.43e-10 |
| 240.00 | 3.33e-22 | 1.23 | 1.76e+12 | 1.75e+12 | 7.15e-10 |
| 250.00 | 2.78e-22 | 1.21 | 1.84e+12 | 1.84e+12 | 6.17e-10 |
| 260.00 | 2.36e-22 | 1.19 | 1.91e+12 | 1.91e+12 | 5.39e-10 |
| 270.00 | 2.04e-22 | 1.18 | 1.99e+12 | 1.99e+12 | 4.77e-10 |
| 280.00 | 1.78e-22 | 1.17 | 2.06e+12 | 2.06e+12 | 4.28e-10 |
| 290.00 | 1.58e-22 | 1.15 | 2.13e+12 | 2.13e+12 | 3.87e-10 |
| 298.00 | 1.44e-22 | 1.14 | 2.18e+12 | 2.18e+12 | 3.59e-10 |
| 300.00 | 1.41e-22 | 1.14 | 2.19e+12 | 2.19e+12 | 3.53e-10 |
| 310.00 | 1.27e-22 | 1.13 | 2.26e+12 | 2.26e+12 | 3.26e-10 |
| 320.00 | 1.16e-22 | 1.12 | 2.32e+12 | 2.32e+12 | 3.02e-10 |

S= 0.210, 0.421, 0.841, 1.261, 2.103, 2.944, 3.366, 4.207, 5.048, -0.210, -0.421, -0.842, -1.263, -2.105, -2.946, -3.367, -4.209, -5.051, -6.313.

### PTS3a

| T      | Keq      | tunn   | ktst     | kcvt     | kt       |
|--------|----------|--------|----------|----------|----------|
| 220.00 | 9.78e-19 | 169.66 | 4.05e+08 | 3.56e+08 | 5.91e-08 |
| 230.00 | 5.02e-19 | 121.61 | 5.91e+08 | 5.23e+08 | 3.19e-08 |
| 240.00 | 2.73e-19 | 89.91  | 8.36e+08 | 7.43e+08 | 1.83e-08 |
| 250.00 | 1.57e-19 | 67.96  | 1.15e+09 | 1.03e+09 | 1.10e-08 |
| 260.00 | 9.39e-20 | 53.19  | 1.54e+09 | 1.38e+09 | 6.89e-09 |
| 270.00 | 5.86e-20 | 42.20  | 2.02e+09 | 1.82e+09 | 4.50e-09 |
| 280.00 | 3.79e-20 | 34.32  | 2.60e+09 | 2.34e+09 | 3.04e-09 |

|        |          |       |          |          |          |
|--------|----------|-------|----------|----------|----------|
| 290.00 | 2.53e-20 | 28.22 | 3.29e+09 | 2.97e+09 | 2.12e-09 |
| 298.00 | 1.87e-20 | 24.45 | 3.92e+09 | 3.55e+09 | 1.63e-09 |
| 300.00 | 1.74e-20 | 23.65 | 4.09e+09 | 3.70e+09 | 1.52e-09 |
| 310.00 | 1.23e-20 | 20.04 | 5.01e+09 | 4.55e+09 | 1.12e-09 |
| 320.00 | 8.88e-21 | 17.21 | 6.07e+09 | 5.52e+09 | 8.44e-10 |

S=0.153, 0.307, 0.614, 0.920, 1.534, 2.147, 2.454, 3.067, 3.681, 4.602, -0.154, -0.307, -0.614, -0.920, -1.540, -2.147, -2.454, -3.068, -3.681

### PTS3b

| T      | Keq      | tunn   | ktst     | kcvt     | kt       |
|--------|----------|--------|----------|----------|----------|
| 220.00 | 9.88e-19 | 843.75 | 1.91e+06 | 1.60e+06 | 1.33e-09 |
| 230.00 | 5.08e-19 | 506.67 | 3.56e+06 | 3.00e+06 | 7.72e-10 |
| 240.00 | 2.76e-19 | 320.22 | 6.31e+06 | 5.34e+06 | 4.73e-10 |
| 250.00 | 1.58e-19 | 212.79 | 1.07e+07 | 9.07e+06 | 3.06e-10 |
| 260.00 | 9.49e-20 | 147.30 | 1.73e+07 | 1.48e+07 | 2.07e-10 |
| 270.00 | 5.93e-20 | 105.15 | 2.71e+07 | 2.33e+07 | 1.45e-10 |
| 280.00 | 3.83e-20 | 77.75  | 4.11e+07 | 3.55e+07 | 1.06e-10 |
| 290.00 | 2.56e-20 | 59.16  | 6.06e+07 | 5.24e+07 | 7.94e-11 |
| 298.00 | 1.89e-20 | 48.36  | 8.10e+07 | 7.03e+07 | 6.44e-11 |
| 300.00 | 1.76e-20 | 45.96  | 8.69e+07 | 7.55e+07 | 6.11e-11 |
| 310.00 | 1.24e-20 | 36.70  | 1.22e+08 | 1.06e+08 | 4.84e-11 |
| 320.00 | 8.99e-21 | 29.79  | 1.67e+08 | 1.46e+08 | 3.91e-11 |

S= S=0.153, 0.307, 0.614, 0.920, 1.534, 2.147, 2.454, 3.067, 3.681, 4.602, -0.154, -0.307, -0.614, -0.920, -1.540, -2.147, -2.454, -3.068, -3.681

### HTS11a

| T      | Keq      | tunn | ktst     | kcvt     | kt       |
|--------|----------|------|----------|----------|----------|
| 220.00 | 5.51e-22 | 5.50 | 1.03e+11 | 1.03e+10 | 3.12e-11 |
| 230.00 | 4.31e-22 | 4.82 | 1.22e+11 | 1.35e+10 | 2.81e-11 |
| 240.00 | 3.45e-22 | 4.29 | 1.43e+11 | 1.73e+10 | 2.56e-11 |
| 250.00 | 2.82e-22 | 3.87 | 1.65e+11 | 2.18e+10 | 2.38e-11 |
| 260.00 | 2.34e-22 | 3.51 | 1.88e+11 | 2.70e+10 | 2.23e-11 |
| 270.00 | 1.98e-22 | 3.22 | 2.13e+11 | 3.29e+10 | 2.10e-11 |
| 280.00 | 1.70e-22 | 2.99 | 2.39e+11 | 3.94e+10 | 2.01e-11 |
| 290.00 | 1.48e-22 | 2.80 | 2.67e+11 | 4.68e+10 | 1.94e-11 |
| 298.00 | 1.33e-22 | 2.65 | 2.89e+11 | 5.32e+10 | 1.88e-11 |
| 300.00 | 1.30e-22 | 2.62 | 2.95e+11 | 5.49e+10 | 1.87e-11 |
| 310.00 | 1.16e-22 | 2.48 | 3.25e+11 | 6.37e+10 | 1.83e-11 |
| 320.00 | 1.04e-22 | 2.35 | 3.55e+11 | 7.33e+10 | 1.78e-11 |

S= 0.157, 0.314, 0.629, 0.943, 1.572, 2.201, 2.515, 3.144, 3.772, 4.716, -0.157, -0.314, -0.629, -0.942, -1.572, -2.200, -2.515, -3.143, -3.772, -4.716

### HTS11b

| T      | Keq      | tunn | ktst     | kcvt     | kt       |
|--------|----------|------|----------|----------|----------|
| 220.00 | 1.30e-21 | 4.69 | 1.19e+10 | 9.76e+08 | 5.95e-12 |
| 230.00 | 1.01e-21 | 4.13 | 1.54e+10 | 1.42e+09 | 5.95e-12 |
| 240.00 | 8.09e-22 | 3.72 | 1.95e+10 | 1.99e+09 | 6.00e-12 |
| 250.00 | 6.60e-22 | 3.38 | 2.43e+10 | 2.73e+09 | 6.09e-12 |
| 260.00 | 5.49e-22 | 3.10 | 2.97e+10 | 3.64e+09 | 6.20e-12 |

|        |          |      |          |          |          |
|--------|----------|------|----------|----------|----------|
| 270.00 | 4.63e-22 | 2.87 | 3.59e+10 | 4.77e+09 | 6.35e-12 |
| 280.00 | 3.97e-22 | 2.68 | 4.28e+10 | 6.12e+09 | 6.51e-12 |
| 290.00 | 3.45e-22 | 2.52 | 5.05e+10 | 7.73e+09 | 6.73e-12 |
| 298.00 | 3.11e-22 | 2.40 | 5.71e+10 | 9.21e+09 | 6.87e-12 |
| 300.00 | 3.03e-22 | 2.38 | 5.89e+10 | 9.60e+09 | 6.91e-12 |
| 310.00 | 2.69e-22 | 2.25 | 6.80e+10 | 1.18e+10 | 7.16e-12 |
| 320.00 | 2.41e-22 | 2.16 | 7.80e+10 | 1.42e+10 | 7.40e-12 |

S= 0.157, 0.315, 0.631, 0.947, 1.578, 2.209, 2.524, 3.156, 3.787,4.733, at both sides of the IRC

### HTS5a

| T      | Keq      | tunn      | ktst     | kcvt     | kt       |
|--------|----------|-----------|----------|----------|----------|
| 220.00 | 1.97e-20 | 547619.05 | 3.81e+02 | 3.78e+02 | 4.08e-12 |
| 230.00 | 1.26e-20 | 224509.80 | 1.03e+03 | 1.02e+03 | 2.89e-12 |
| 240.00 | 8.41e-21 | 100395.26 | 2.55e+03 | 2.53e+03 | 2.14e-12 |
| 250.00 | 5.81e-21 | 48287.67  | 5.88e+03 | 5.84e+03 | 1.64e-12 |
| 260.00 | 4.15e-21 | 24645.67  | 1.27e+04 | 1.27e+04 | 1.30e-12 |
| 270.00 | 3.05e-21 | 13436.29  | 2.61e+04 | 2.59e+04 | 1.06e-12 |
| 280.00 | 2.29e-21 | 7658.73   | 5.07e+04 | 5.04e+04 | 8.85e-13 |
| 290.00 | 1.77e-21 | 4578.44   | 9.43e+04 | 9.37e+04 | 7.57e-13 |
| 298.00 | 1.45e-21 | 3127.52   | 1.50e+05 | 1.49e+05 | 6.77e-13 |
| 300.00 | 1.39e-21 | 2850.30   | 1.68e+05 | 1.67e+05 | 6.60e-13 |
| 310.00 | 1.11e-21 | 1833.33   | 2.89e+05 | 2.88e+05 | 5.86e-13 |
| 320.00 | 9.02e-22 | 1221.29   | 4.81e+05 | 4.79e+05 | 5.28e-13 |

S= 0.156, 0.312, 0.624, 0.936, 1.560, 2.138, 2.496, 3.120, 3.744, 4.680, at both sides of the IRC

### HTS5b

| T      | Keq      | tunn      | ktst     | kcvt     | kt       |
|--------|----------|-----------|----------|----------|----------|
| 220.00 | 1.97e-20 | 125179.86 | 1.48e+01 | 1.39e+01 | 3.43e-14 |
| 230.00 | 1.26e-20 | 59540.23  | 4.63e+01 | 4.35e+01 | 3.27e-14 |
| 240.00 | 8.41e-21 | 30403.23  | 1.31e+02 | 1.24e+02 | 3.17e-14 |
| 250.00 | 5.81e-21 | 16584.62  | 3.44e+02 | 3.25e+02 | 3.13e-14 |
| 260.00 | 4.15e-21 | 9557.52   | 8.36e+02 | 7.91e+02 | 3.14e-14 |
| 270.00 | 3.05e-21 | 5777.78   | 1.90e+03 | 1.80e+03 | 3.17e-14 |
| 280.00 | 2.29e-21 | 3624.68   | 4.09e+03 | 3.89e+03 | 3.23e-14 |
| 290.00 | 1.77e-21 | 2367.76   | 8.34e+03 | 7.94e+03 | 3.32e-14 |
| 298.00 | 1.45e-21 | 1727.94   | 1.43e+04 | 1.36e+04 | 3.42e-14 |
| 300.00 | 1.39e-21 | 1600.00   | 1.62e+04 | 1.55e+04 | 3.44e-14 |
| 310.00 | 1.11e-21 | 1110.73   | 3.03e+04 | 2.89e+04 | 3.56e-14 |
| 320.00 | 9.02e-22 | 792.31    | 5.44e+04 | 5.20e+04 | 3.72e-14 |

S= 0.156, 0.312, 0.624, 0.936, 1.560, 2.138, 2.496, 3.120, 3.744, 4.680, at both sides of the IRC

### HTS6a

| T      | Keq      | tunn  | ktst     | kcvt     | kt       |
|--------|----------|-------|----------|----------|----------|
| 220.00 | 5.24e-22 | 13.20 | 4.25e+08 | 3.22e+08 | 2.22e-12 |
| 230.00 | 4.04e-22 | 11.15 | 6.09e+08 | 4.68e+08 | 2.11e-12 |

|        |          |      |          |          |          |
|--------|----------|------|----------|----------|----------|
| 240.00 | 3.21e-22 | 9.58 | 8.46e+08 | 6.59e+08 | 2.02e-12 |
| 250.00 | 2.60e-22 | 8.36 | 1.14e+09 | 9.02e+08 | 1.96e-12 |
| 260.00 | 2.16e-22 | 7.36 | 1.51e+09 | 1.21e+09 | 1.92e-12 |
| 270.00 | 1.82e-22 | 6.58 | 1.96e+09 | 1.58e+09 | 1.89e-12 |
| 280.00 | 1.56e-22 | 5.94 | 2.50e+09 | 2.02e+09 | 1.87e-12 |
| 290.00 | 1.35e-22 | 5.41 | 3.12e+09 | 2.55e+09 | 1.87e-12 |
| 298.00 | 1.22e-22 | 5.03 | 3.70e+09 | 3.04e+09 | 1.87e-12 |
| 300.00 | 1.19e-22 | 4.95 | 3.85e+09 | 3.17e+09 | 1.87e-12 |
| 310.00 | 1.06e-22 | 4.58 | 4.69e+09 | 3.89e+09 | 1.89e-12 |
| 320.00 | 9.54e-23 | 4.23 | 5.64e+09 | 4.71e+09 | 1.90e-12 |

S= 0.156, 0.312, 0.624, 0.936, 1.560, 2.138, 2.496, 3.120, 3.744, 4.680, at both sides of the IRC

### HTS6b

| T      | Keq      | tunn | ktst     | kcvt     | kt       |
|--------|----------|------|----------|----------|----------|
| 220.00 | 2.61e-20 | 4.12 | 1.78e+05 | 1.73e+05 | 1.86e-14 |
| 230.00 | 1.67e-20 | 3.72 | 3.58e+05 | 3.47e+05 | 2.15e-14 |
| 240.00 | 1.11e-20 | 3.36 | 6.77e+05 | 6.57e+05 | 2.46e-14 |
| 250.00 | 7.69e-21 | 3.10 | 1.22e+06 | 1.18e+06 | 2.81e-14 |
| 260.00 | 5.48e-21 | 2.86 | 2.09e+06 | 2.04e+06 | 3.20e-14 |
| 270.00 | 4.02e-21 | 2.68 | 3.46e+06 | 3.37e+06 | 3.63e-14 |
| 280.00 | 3.03e-21 | 2.51 | 5.52e+06 | 5.38e+06 | 4.09e-14 |
| 290.00 | 2.33e-21 | 2.38 | 8.52e+06 | 8.32e+06 | 4.61e-14 |
| 298.00 | 1.92e-21 | 2.29 | 1.18e+07 | 1.15e+07 | 5.04e-14 |
| 300.00 | 1.83e-21 | 2.26 | 1.28e+07 | 1.25e+07 | 5.16e-14 |
| 310.00 | 1.46e-21 | 2.15 | 1.87e+07 | 1.83e+07 | 5.76e-14 |
| 320.00 | 1.19e-21 | 2.06 | 2.67e+07 | 2.62e+07 | 6.41e-14 |

S= 0.156, 0.312, 0.624, 0.936, 1.560, 2.138, 2.496, 3.120, 3.744, 4.680, at both sides of the IRC

### HTS8a

| T      | Keq      | tunn  | ktst     | kcvt     | kt       |
|--------|----------|-------|----------|----------|----------|
| 220.00 | 1.94e-17 | 38.53 | 4.99e+02 | 4.36e+02 | 3.26e-13 |
| 230.00 | 8.40e-18 | 29.27 | 1.40e+03 | 1.23e+03 | 3.02e-13 |
| 240.00 | 3.91e-18 | 23.01 | 3.59e+03 | 3.19e+03 | 2.87e-13 |
| 250.00 | 1.94e-18 | 18.67 | 8.55e+03 | 7.66e+03 | 2.77e-13 |
| 260.00 | 1.02e-18 | 15.41 | 1.91e+04 | 1.72e+04 | 2.70e-13 |
| 270.00 | 5.62e-19 | 12.99 | 4.02e+04 | 3.64e+04 | 2.66e-13 |
| 280.00 | 3.24e-19 | 11.12 | 8.01e+04 | 7.31e+04 | 2.63e-13 |
| 290.00 | 1.94e-19 | 9.64  | 1.53e+05 | 1.40e+05 | 2.63e-13 |
| 298.00 | 1.33e-19 | 8.73  | 2.48e+05 | 2.28e+05 | 2.64e-13 |
| 300.00 | 1.21e-19 | 8.48  | 2.78e+05 | 2.57e+05 | 2.64e-13 |
| 310.00 | 7.78e-20 | 7.57  | 4.89e+05 | 4.52e+05 | 2.66e-13 |
| 320.00 | 5.15e-20 | 6.79  | 8.30e+05 | 7.70e+05 | 2.69e-13 |

S= 0.156, 0.312, 0.624, 0.936, 1.560, 2.138, 2.496, 3.120, 3.744, 4.680, at both sides of the IRC

### HTS8b

| T | Keq | tunn | ktst | kcvt | kt |
|---|-----|------|------|------|----|
|---|-----|------|------|------|----|

|        |          |       |          |          |          |
|--------|----------|-------|----------|----------|----------|
| 220.00 | 1.68e-18 | 14.43 | 8.37e+03 | 5.66e+02 | 1.38e-14 |
| 230.00 | 8.24e-19 | 11.35 | 2.04e+04 | 1.55e+03 | 1.45e-14 |
| 240.00 | 4.29e-19 | 9.28  | 4.61e+04 | 3.91e+03 | 1.56e-14 |
| 250.00 | 2.36e-19 | 7.81  | 9.77e+04 | 9.16e+03 | 1.69e-14 |
| 260.00 | 1.36e-19 | 6.72  | 1.96e+05 | 2.01e+04 | 1.84e-14 |
| 270.00 | 8.21e-20 | 5.83  | 3.73e+05 | 4.17e+04 | 2.00e-14 |
| 280.00 | 5.14e-20 | 5.17  | 6.78e+05 | 8.20e+04 | 2.18e-14 |
| 290.00 | 3.33e-20 | 4.64  | 1.18e+06 | 1.54e+05 | 2.38e-14 |
| 298.00 | 2.41e-20 | 4.27  | 1.80e+06 | 2.48e+05 | 2.56e-14 |
| 300.00 | 2.23e-20 | 4.21  | 2.00e+06 | 2.78e+05 | 2.61e-14 |
| 310.00 | 1.53e-20 | 3.85  | 3.25e+06 | 4.83e+05 | 2.85e-14 |
| 320.00 | 1.08e-20 | 3.54  | 5.14e+06 | 8.10e+05 | 3.10e-14 |

S= 0.156, 0.312, 0.624, 0.936, 1.560, 2.138, 2.496, 3.120, 3.744, 4.680, at both sides of the IRC

### Reactions starting by HSSNH<sub>2</sub> + OH

#### BTS1a

| T      | Keq      | kTST     | kt       |
|--------|----------|----------|----------|
| 220.00 | 3.18e-22 | 4.59e+10 | 1.46e-11 |
| 230.00 | 2.80e-22 | 4.62e+10 | 1.29e-11 |
| 240.00 | 2.50e-22 | 4.65e+10 | 1.16e-11 |
| 250.00 | 2.26e-22 | 4.66e+10 | 1.05e-11 |
| 260.00 | 2.07e-22 | 4.67e+10 | 9.65e-12 |
| 270.00 | 1.91e-22 | 4.68e+10 | 8.92e-12 |
| 280.00 | 1.78e-22 | 4.68e+10 | 8.32e-12 |
| 290.00 | 1.67e-22 | 4.68e+10 | 7.80e-12 |
| 298.00 | 1.59e-22 | 4.68e+10 | 7.45e-12 |
| 300.00 | 1.57e-22 | 4.68e+10 | 7.36e-12 |
| 310.00 | 1.50e-22 | 4.67e+10 | 6.99e-12 |
| 320.00 | 1.43e-22 | 4.67e+10 | 6.68e-12 |

Conventional TST only

#### Reverse-BTS1a

| T      | Keq      | ktst     | kt       |
|--------|----------|----------|----------|
| 220.00 | 4.98e-22 | 4.11e-07 | 2.04e-28 |
| 230.00 | 3.29e-22 | 2.48e-06 | 8.16e-28 |
| 240.00 | 2.26e-22 | 1.28e-05 | 2.90e-27 |
| 250.00 | 1.61e-22 | 5.84e-05 | 9.41e-27 |
| 260.00 | 1.18e-22 | 2.36e-04 | 2.79e-26 |
| 270.00 | 8.90e-23 | 8.63e-04 | 7.68e-26 |
| 280.00 | 6.87e-23 | 2.87e-03 | 1.97e-25 |
| 290.00 | 5.41e-23 | 8.80e-03 | 4.76e-25 |
| 298.00 | 4.53e-23 | 2.04e-02 | 9.24e-25 |
| 300.00 | 4.34e-23 | 2.50e-02 | 1.09e-24 |
| 310.00 | 3.55e-23 | 6.66e-02 | 2.36e-24 |
| 320.00 | 2.94e-23 | 1.67e-01 | 4.91e-24 |



Conventional TST only

**Reverse-BTS1b**

| T      | Keq      | ktst     | kt       |
|--------|----------|----------|----------|
| 220.00 | 4.98e-22 | 1.53e-08 | 7.61e-30 |
| 230.00 | 3.29e-22 | 1.08e-07 | 3.55e-29 |
| 240.00 | 2.26e-22 | 6.45e-07 | 1.46e-28 |
| 250.00 | 1.61e-22 | 3.35e-06 | 5.40e-28 |
| 260.00 | 1.18e-22 | 1.53e-05 | 1.81e-27 |
| 270.00 | 8.90e-23 | 6.26e-05 | 5.57e-27 |
| 280.00 | 6.87e-23 | 2.32e-04 | 1.59e-26 |
| 290.00 | 5.41e-23 | 7.85e-04 | 4.25e-26 |
| 298.00 | 4.53e-23 | 1.96e-03 | 8.88e-26 |
| 300.00 | 4.34e-23 | 2.45e-03 | 1.06e-25 |
| 310.00 | 3.55e-23 | 7.11e-03 | 2.52e-25 |
| 320.00 | 2.94e-23 | 1.93e-02 | 5.68e-25 |

Conventional TST only

**BTS1b**

| T      | Keq      | ktST     | kt       |
|--------|----------|----------|----------|
| 220.00 | 3.53e-22 | 1.46e+09 | 5.15e-13 |
| 230.00 | 2.72e-22 | 1.96e+09 | 5.33e-13 |
| 240.00 | 2.15e-22 | 2.57e+09 | 5.53e-13 |
| 250.00 | 1.74e-22 | 3.30e+09 | 5.73e-13 |
| 260.00 | 1.43e-22 | 4.16e+09 | 5.94e-13 |
| 270.00 | 1.19e-22 | 5.16e+09 | 6.17e-13 |
| 280.00 | 1.01e-22 | 6.30e+09 | 6.39e-13 |
| 290.00 | 8.72e-23 | 7.59e+09 | 6.62e-13 |
| 298.00 | 7.80e-23 | 8.74e+09 | 6.81e-13 |
| 300.00 | 7.59e-23 | 9.04e+09 | 6.86e-13 |
| 310.00 | 6.68e-23 | 1.07e+10 | 7.14e-13 |
| 320.00 | 5.93e-23 | 1.24e+10 | 7.35e-13 |

Conventional TST only

**FTS1a**

| T      | Keq      | ktst     | kcvt     | kt       |
|--------|----------|----------|----------|----------|
| 220.00 | 3.18e-22 | 5.15e+06 | 5.07e+06 | 1.61e-15 |
| 230.00 | 2.80e-22 | 8.05e+06 | 7.93e+06 | 2.22e-15 |
| 240.00 | 2.50e-22 | 1.21e+07 | 1.19e+07 | 2.97e-15 |
| 250.00 | 2.26e-22 | 1.76e+07 | 1.74e+07 | 3.93e-15 |
| 260.00 | 2.07e-22 | 2.49e+07 | 2.46e+07 | 5.08e-15 |
| 270.00 | 1.91e-22 | 3.42e+07 | 3.38e+07 | 6.44e-15 |
| 280.00 | 1.78e-22 | 4.60e+07 | 4.54e+07 | 8.06e-15 |
| 290.00 | 1.67e-22 | 6.05e+07 | 5.97e+07 | 9.95e-15 |
| 298.00 | 1.59e-22 | 7.42e+07 | 7.33e+07 | 1.17e-14 |
| 300.00 | 1.57e-22 | 7.80e+07 | 7.70e+07 | 1.21e-14 |
| 310.00 | 1.50e-22 | 9.89e+07 | 9.77e+07 | 1.46e-14 |
| 320.00 | 1.43e-22 | 1.23e+08 | 1.22e+08 | 1.74e-14 |

S= 0.244, 0.488, 0.977, 1.466, 2.447,3.420, 3.908, 4.885,5.816,6.253, at both sides of the IRC

**FTS1b**

| T      | Keq      | ktst     | kcvt     | kt       |
|--------|----------|----------|----------|----------|
| 220.00 | 3.53e-22 | 8.42e+01 | 7.36e+01 | 2.60e-20 |
| 230.00 | 2.72e-22 | 2.13e+02 | 1.87e+02 | 5.09e-20 |
| 240.00 | 2.15e-22 | 4.98e+02 | 4.38e+02 | 9.42e-20 |
| 250.00 | 1.74e-22 | 1.09e+03 | 9.57e+02 | 1.66e-19 |
| 260.00 | 1.43e-22 | 2.23e+03 | 1.97e+03 | 2.81e-19 |
| 270.00 | 1.19e-22 | 4.34e+03 | 3.84e+03 | 4.59e-19 |
| 280.00 | 1.01e-22 | 8.04e+03 | 7.13e+03 | 7.23e-19 |
| 290.00 | 8.72e-23 | 1.43e+04 | 1.27e+04 | 1.11e-18 |
| 298.00 | 7.80e-23 | 2.19e+04 | 1.95e+04 | 1.52e-18 |
| 300.00 | 7.59e-23 | 2.43e+04 | 2.17e+04 | 1.65e-18 |
| 310.00 | 6.68e-23 | 4.01e+04 | 3.58e+04 | 2.39e-18 |
| 320.00 | 5.93e-23 | 6.41e+04 | 5.72e+04 | 3.39e-18 |

S= 0.274, 0.548, 1.095, 1.643, 2.3879, 3.834, 4.3812, 5.468, 6.572,7.013 , at both sides of the IRC

**BTS2a**

| T      | Keq      | ktst     | kcvt     | kt       |
|--------|----------|----------|----------|----------|
| 220.00 | 3.38e-19 | 3.13e+10 | 2.87e+10 | 9.69e-09 |
| 230.00 | 1.78e-19 | 3.86e+10 | 3.54e+10 | 6.29e-09 |
| 240.00 | 9.88e-20 | 4.67e+10 | 4.29e+10 | 4.24e-09 |
| 250.00 | 5.78e-20 | 5.56e+10 | 5.12e+10 | 2.96e-09 |
| 260.00 | 3.53e-20 | 6.53e+10 | 6.03e+10 | 2.13e-09 |
| 270.00 | 2.25e-20 | 7.58e+10 | 7.01e+10 | 1.57e-09 |
| 280.00 | 1.48e-20 | 8.71e+10 | 8.06e+10 | 1.19e-09 |
| 290.00 | 1.00e-20 | 9.90e+10 | 9.18e+10 | 9.21e-10 |
| 298.00 | 7.52e-21 | 1.09e+11 | 1.01e+11 | 7.59e-10 |
| 300.00 | 7.01e-21 | 1.12e+11 | 1.04e+11 | 7.29e-10 |
| 310.00 | 5.02e-21 | 1.25e+11 | 1.16e+11 | 5.82e-10 |
| 320.00 | 3.68e-21 | 1.39e+11 | 1.29e+11 | 4.75e-10 |

S= 0.147, 0.296, 0.595, 0.895,1.494, 2.092, 2.393, 3.588, 4.4.86, -0.147, -0.296, -0.595, -0.895,-1.494, -2.092, -2.395, -2.995, - 3.595, -4.495

**Reverse-BTS2a**

| T      | Keq      | ktst     | kt       |
|--------|----------|----------|----------|
| 220.00 | 5.64e-21 | 5.50e-02 | 3.10e-22 |
| 230.00 | 3.49e-21 | 2.16e-01 | 7.53e-22 |
| 240.00 | 2.25e-21 | 7.59e-01 | 1.71e-21 |
| 250.00 | 1.51e-21 | 2.41e+00 | 3.65e-21 |
| 260.00 | 1.05e-21 | 7.01e+00 | 7.36e-21 |
| 270.00 | 7.51e-22 | 1.89e+01 | 1.42e-20 |
| 280.00 | 5.52e-22 | 4.72e+01 | 2.60e-20 |
| 290.00 | 4.15e-22 | 1.11e+02 | 4.61e-20 |
| 298.00 | 3.36e-22 | 2.12e+02 | 7.12e-20 |

|        |          |          |          |
|--------|----------|----------|----------|
| 300.00 | 3.19e-22 | 2.47e+02 | 7.88e-20 |
| 310.00 | 2.50e-22 | 5.22e+02 | 1.30e-19 |
| 320.00 | 1.99e-22 | 1.05e+03 | 2.09e-19 |

Conventional TST only

### Reverse-BTS2b

| T      | Keq      | ktst     | kt       |
|--------|----------|----------|----------|
| 220.00 | 5.64e-21 | 3.09e-03 | 1.74e-23 |
| 230.00 | 3.49e-21 | 1.40e-02 | 4.88e-23 |
| 240.00 | 2.25e-21 | 5.56e-02 | 1.25e-22 |
| 250.00 | 1.51e-21 | 1.99e-01 | 3.01e-22 |
| 260.00 | 1.05e-21 | 6.43e-01 | 6.75e-22 |
| 270.00 | 7.51e-22 | 1.91e+00 | 1.43e-21 |
| 280.00 | 5.52e-22 | 5.26e+00 | 2.90e-21 |
| 290.00 | 4.15e-22 | 1.35e+01 | 5.60e-21 |
| 298.00 | 3.36e-22 | 2.74e+01 | 9.20e-21 |
| 300.00 | 3.19e-22 | 3.26e+01 | 1.04e-20 |
| 310.00 | 2.50e-22 | 7.42e+01 | 1.85e-20 |
| 320.00 | 1.99e-22 | 1.61e+02 | 3.21e-20 |

Conventional TST only

### BTS2b

| # T    | Keq      | ktst     | kcvt     | kt       |
|--------|----------|----------|----------|----------|
| 220.00 | 6.33e-20 | 1.08e+10 | 1.02e+10 | 6.45e-10 |
| 230.00 | 3.74e-20 | 1.35e+10 | 1.28e+10 | 4.79e-10 |
| 240.00 | 2.32e-20 | 1.66e+10 | 1.57e+10 | 3.65e-10 |
| 250.00 | 1.50e-20 | 2.01e+10 | 1.91e+10 | 2.87e-10 |
| 260.00 | 1.01e-20 | 2.39e+10 | 2.27e+10 | 2.29e-10 |
| 270.00 | 6.99e-21 | 2.81e+10 | 2.67e+10 | 1.87e-10 |
| 280.00 | 4.99e-21 | 3.27e+10 | 3.11e+10 | 1.55e-10 |
| 290.00 | 3.65e-21 | 3.76e+10 | 3.57e+10 | 1.30e-10 |
| 298.00 | 2.90e-21 | 4.17e+10 | 3.97e+10 | 1.15e-10 |
| 300.00 | 2.74e-21 | 4.27e+10 | 4.07e+10 | 1.11e-10 |
| 310.00 | 2.10e-21 | 4.82e+10 | 4.59e+10 | 9.62e-11 |
| 320.00 | 1.63e-21 | 5.40e+10 | 5.14e+10 | 8.40e-11 |

S= 0.147, 0.296, 0.595, 0.895, 1.494, 2.092, 2.393, 3.588, 4.4.86, -0.147, -0.296, -0.595, -0.895, -1.494, -2.092, -2.395, -2.995, -3.595, -4.495

### FTS2a

| T      | Keq      | ktst     | kcvt     | kt       |
|--------|----------|----------|----------|----------|
| 220.00 | 1.07e-18 | 1.51e+06 | 1.35e+06 | 1.44e-12 |
| 230.00 | 5.34e-19 | 2.71e+06 | 2.42e+06 | 1.29e-12 |
| 240.00 | 2.83e-19 | 4.63e+06 | 4.15e+06 | 1.18e-12 |
| 250.00 | 1.58e-19 | 7.57e+06 | 6.80e+06 | 1.08e-12 |
| 260.00 | 9.28e-20 | 1.19e+07 | 1.07e+07 | 9.93e-13 |
| 270.00 | 5.67e-20 | 1.81e+07 | 1.64e+07 | 9.30e-13 |
| 280.00 | 3.60e-20 | 2.68e+07 | 2.43e+07 | 8.74e-13 |
| 290.00 | 2.36e-20 | 3.85e+07 | 3.49e+07 | 8.24e-13 |
| 298.00 | 1.72e-20 | 5.06e+07 | 4.59e+07 | 7.90e-13 |

|        |          |          |          |          |
|--------|----------|----------|----------|----------|
| 300.00 | 1.59e-20 | 5.40e+07 | 4.91e+07 | 7.83e-13 |
| 310.00 | 1.11e-20 | 7.41e+07 | 6.75e+07 | 7.48e-13 |
| 320.00 | 7.88e-21 | 9.97e+07 | 9.09e+07 | 7.16e-13 |

S= 0.242, 0.484, 0.968, 1.453, 2.421, 3.389, 3.873, 4.836, -0.242, -0.484, -0.968, -1.453, -2.421, -3.389, -3.873, -4.836, -5.807, -7.256

### FTS2b

| T      | Keq      | ktst     | kcvt     | kt       |
|--------|----------|----------|----------|----------|
| 220.00 | 9.69e-18 | 1.10e+05 | 6.72e+04 | 6.51e-13 |
| 230.00 | 4.31e-18 | 2.35e+05 | 1.45e+05 | 6.25e-13 |
| 240.00 | 2.06e-18 | 4.69e+05 | 2.92e+05 | 6.00e-13 |
| 250.00 | 1.04e-18 | 8.88e+05 | 5.59e+05 | 5.83e-13 |
| 260.00 | 5.58e-19 | 1.60e+06 | 1.02e+06 | 5.70e-13 |
| 270.00 | 3.14e-19 | 2.76e+06 | 1.77e+06 | 5.56e-13 |
| 280.00 | 1.84e-19 | 4.59e+06 | 2.95e+06 | 5.43e-13 |
| 290.00 | 1.12e-19 | 7.35e+06 | 4.76e+06 | 5.35e-13 |
| 298.00 | 7.76e-20 | 1.05e+07 | 6.82e+06 | 5.29e-13 |
| 300.00 | 7.10e-20 | 1.14e+07 | 7.43e+06 | 5.28e-13 |
| 310.00 | 4.63e-20 | 1.72e+07 | 1.13e+07 | 5.23e-13 |
| 320.00 | 3.10e-20 | 2.54e+07 | 1.67e+07 | 5.18e-13 |

S=0.264, 0.5238, 1.055, 2.638, 3.694, 4.221, 5.278, -0.264, -0.5238, -1.055, -2.638, -3.694, -4.221, -5.278, -6.327, -7.907

### HTS3a

| T      | Keq      | tun  | ktst     | kcvt     | kt       |
|--------|----------|------|----------|----------|----------|
| 220.00 | 1.55e-21 | 0.67 | 2.51e+11 | 2.18e+11 | 2.28e-10 |
| 230.00 | 1.14e-21 | 0.67 | 2.81e+11 | 2.45e+11 | 1.87e-10 |
| 240.00 | 8.58e-22 | 0.68 | 3.12e+11 | 2.71e+11 | 1.57e-10 |
| 250.00 | 6.65e-22 | 0.68 | 3.43e+11 | 2.98e+11 | 1.34e-10 |
| 260.00 | 5.27e-22 | 0.68 | 3.74e+11 | 3.25e+11 | 1.17e-10 |
| 270.00 | 4.27e-22 | 0.68 | 4.06e+11 | 3.53e+11 | 1.03e-10 |
| 280.00 | 3.51e-22 | 0.68 | 4.37e+11 | 3.80e+11 | 9.13e-11 |
| 290.00 | 2.94e-22 | 0.69 | 4.69e+11 | 4.07e+11 | 8.23e-11 |
| 298.00 | 2.57e-22 | 0.69 | 4.94e+11 | 4.28e+11 | 7.60e-11 |
| 300.00 | 2.49e-22 | 0.69 | 5.01e+11 | 4.34e+11 | 7.46e-11 |
| 310.00 | 2.14e-22 | 0.69 | 5.32e+11 | 4.60e+11 | 6.84e-11 |
| 320.00 | 1.86e-22 | 0.69 | 5.63e+11 | 4.87e+11 | 6.30e-11 |

S= 0.-207, 0.413, 0.827, 1.238, 2.066, 2.893, 3.305, 4.131, 4.,957, 6.197, at both sides of the IRC

### HTS3b

| T      | Keq      | tun  | ktst     | kcvt     | kt       |
|--------|----------|------|----------|----------|----------|
| 220.00 | 9.69e-18 | 1.28 | 2.24e+07 | 1.70e+07 | 2.11e-10 |
| 230.00 | 4.31e-18 | 1.25 | 4.20e+07 | 3.30e+07 | 1.78e-10 |
| 240.00 | 2.06e-18 | 1.22 | 7.48e+07 | 6.07e+07 | 1.53e-10 |
| 250.00 | 1.04e-18 | 1.20 | 1.27e+08 | 1.06e+08 | 1.32e-10 |
| 260.00 | 5.58e-19 | 1.17 | 2.08e+08 | 1.79e+08 | 1.17e-10 |
| 270.00 | 3.14e-19 | 0.69 | 3.29e+08 | 2.85e+08 | 6.15e-11 |
| 280.00 | 1.84e-19 | 0.69 | 5.02e+08 | 4.36e+08 | 5.55e-11 |

|        |          |      |          |          |          |
|--------|----------|------|----------|----------|----------|
| 290.00 | 1.12e-19 | 0.69 | 7.45e+08 | 6.46e+08 | 5.04e-11 |
| 298.00 | 7.76e-20 | 0.70 | 1.00e+09 | 8.69e+08 | 4.70e-11 |
| 300.00 | 7.10e-20 | 0.70 | 1.08e+09 | 9.34e+08 | 4.62e-11 |
| 310.00 | 4.63e-20 | 0.70 | 1.52e+09 | 1.32e+09 | 4.27e-11 |
| 320.00 | 3.10e-20 | 0.70 | 2.10e+09 | 1.82e+09 | 3.97e-11 |

S= 0.248, 0.497, 0.994, 1.489, 2.484, 3.478, 3.975, 4.969, 5.963, -0.248, -0.497, -0.994, -1.489, -2.484, -3.478, -3.129

### PTS3a

| T      | Keq      | tun    | ktst     | kcvt     | kt       |
|--------|----------|--------|----------|----------|----------|
| 220.00 | 3.38e-19 | 119.08 | 2.75e+07 | 2.62e+07 | 1.05e-09 |
| 230.00 | 1.78e-19 | 81.24  | 4.41e+07 | 4.21e+07 | 6.07e-10 |
| 240.00 | 9.88e-20 | 57.45  | 6.80e+07 | 6.51e+07 | 3.70e-10 |
| 250.00 | 5.78e-20 | 42.27  | 1.01e+08 | 9.70e+07 | 2.37e-10 |
| 260.00 | 3.53e-20 | 32.07  | 1.46e+08 | 1.40e+08 | 1.59e-10 |
| 270.00 | 2.25e-20 | 25.10  | 2.05e+08 | 1.96e+08 | 1.10e-10 |
| 280.00 | 1.48e-20 | 20.04  | 2.80e+08 | 2.69e+08 | 7.96e-11 |
| 290.00 | 1.00e-20 | 16.36  | 3.75e+08 | 3.60e+08 | 5.91e-11 |
| 298.00 | 7.52e-21 | 14.08  | 4.66e+08 | 4.49e+08 | 4.75e-11 |
| 300.00 | 7.01e-21 | 13.59  | 4.91e+08 | 4.73e+08 | 4.51e-11 |
| 310.00 | 5.02e-21 | 11.51  | 6.33e+08 | 6.10e+08 | 3.52e-11 |
| 320.00 | 3.68e-21 | 9.90   | 8.02e+08 | 7.73e+08 | 2.82e-11 |

S=0.154, 0.397, 0.614, 0.921, 1.536, 2.150, 2.458, 3.072, 3.686, 4.609, at both sides of the IRC.

### HTS5a

| T      | Keq      | tunn    | ktst     | kcvt     | kt       |
|--------|----------|---------|----------|----------|----------|
| 220.00 | 2.23e-19 | 1706.98 | 2.53e-06 | 2.15e-06 | 8.20e-22 |
| 230.00 | 1.11e-19 | 951.61  | 1.46e-05 | 1.24e-05 | 1.32e-21 |
| 240.00 | 5.92e-20 | 562.90  | 7.26e-05 | 6.20e-05 | 2.07e-21 |
| 250.00 | 3.32e-20 | 352.21  | 3.17e-04 | 2.72e-04 | 3.18e-21 |
| 260.00 | 1.95e-20 | 232.08  | 1.24e-03 | 1.06e-03 | 4.79e-21 |
| 270.00 | 1.20e-20 | 158.78  | 4.37e-03 | 3.76e-03 | 7.14e-21 |
| 280.00 | 7.61e-21 | 113.22  | 1.41e-02 | 1.21e-02 | 1.04e-20 |
| 290.00 | 5.01e-21 | 82.60   | 4.19e-02 | 3.62e-02 | 1.50e-20 |
| 298.00 | 3.67e-21 | 65.94   | 9.52e-02 | 8.22e-02 | 1.99e-20 |
| 300.00 | 3.41e-21 | 62.60   | 1.16e-01 | 1.00e-01 | 2.13e-20 |
| 310.00 | 2.38e-21 | 48.46   | 3.01e-01 | 2.60e-01 | 2.99e-20 |
| 320.00 | 1.70e-21 | 38.21   | 7.34e-01 | 6.36e-01 | 4.13e-20 |

S= 0.157, 0.315, 0.630, 0.944, 1.574, 2.204, 2.519, 3.148, 3.778, 4.722, at both sides of the IRC

### HTS5b

| T      | Keq      | tunn    | ktst     | kcvt     | kt       |
|--------|----------|---------|----------|----------|----------|
| 220.00 | 5.59e-20 | 8576.92 | 4.52e-10 | 1.04e-10 | 4.98e-26 |
| 230.00 | 3.15e-20 | 4235.81 | 3.93e-09 | 9.16e-10 | 1.22e-25 |
| 240.00 | 1.87e-20 | 2274.74 | 2.86e-08 | 6.77e-09 | 2.88e-25 |
| 250.00 | 1.16e-20 | 1309.86 | 1.77e-07 | 4.26e-08 | 6.49e-25 |
| 260.00 | 7.53e-21 | 798.28  | 9.56e-07 | 2.33e-07 | 1.40e-24 |

|        |          |        |          |          |          |
|--------|----------|--------|----------|----------|----------|
| 270.00 | 5.04e-21 | 516.07 | 4.55e-06 | 1.12e-06 | 2.92e-24 |
| 280.00 | 3.49e-21 | 346.47 | 1.94e-05 | 4.82e-06 | 5.83e-24 |
| 290.00 | 2.48e-21 | 241.49 | 7.48e-05 | 1.88e-05 | 1.13e-23 |
| 298.00 | 1.93e-21 | 185.63 | 2.06e-04 | 5.22e-05 | 1.87e-23 |
| 300.00 | 1.81e-21 | 174.89 | 2.64e-04 | 6.69e-05 | 2.12e-23 |
| 310.00 | 1.35e-21 | 129.22 | 8.59e-04 | 2.19e-04 | 3.83e-23 |
| 320.00 | 1.03e-21 | 98.35  | 2.60e-03 | 6.68e-04 | 6.78e-23 |

S= 0.157, 0.315, 0.630, 0.944, 1.574, 2.204, 2.519, 3.148, 3.778, 4,722, at both sides of the IRC

### HTS6a

| T      | Keq      | tunn  | ktst     | kcvt     | kt       |
|--------|----------|-------|----------|----------|----------|
| 220.00 | 7.23e-21 | 14.29 | 1.12e-03 | 1.12e-03 | 1.16e-22 |
| 230.00 | 4.42e-21 | 11.85 | 4.93e-03 | 4.93e-03 | 2.58e-22 |
| 240.00 | 2.83e-21 | 10.05 | 1.91e-02 | 1.91e-02 | 5.43e-22 |
| 250.00 | 1.88e-21 | 8.65  | 6.66e-02 | 6.66e-02 | 1.08e-21 |
| 260.00 | 1.30e-21 | 7.54  | 2.11e-01 | 2.11e-01 | 2.06e-21 |
| 270.00 | 9.21e-22 | 6.68  | 6.12e-01 | 6.12e-01 | 3.76e-21 |
| 280.00 | 6.72e-22 | 5.97  | 1.65e+00 | 1.65e+00 | 6.62e-21 |
| 290.00 | 5.03e-22 | 5.40  | 4.15e+00 | 4.15e+00 | 1.13e-20 |
| 298.00 | 4.06e-22 | 5.00  | 8.30e+00 | 8.30e+00 | 1.68e-20 |
| 300.00 | 3.85e-22 | 4.91  | 9.82e+00 | 9.81e+00 | 1.86e-20 |
| 310.00 | 3.01e-22 | 4.50  | 2.20e+01 | 2.20e+01 | 2.98e-20 |
| 320.00 | 2.39e-22 | 4.17  | 4.69e+01 | 4.68e+01 | 4.67e-20 |

S=0.153, 0.305, 0.6210, 0.915, 1.526, 2.136, 2.441, 3.052, 3.662, 4.578, at both sides of the IRC

### HTS6b

| T      | Keq      | tunn | ktst     | kcvt     | kt       |
|--------|----------|------|----------|----------|----------|
| 220.00 | 7.23e-21 | 6.69 | 9.87e-03 | 9.81e-03 | 4.75e-22 |
| 230.00 | 4.42e-21 | 5.77 | 3.98e-02 | 3.95e-02 | 1.01e-21 |
| 240.00 | 2.83e-21 | 5.06 | 1.43e-01 | 1.42e-01 | 2.03e-21 |
| 250.00 | 1.88e-21 | 4.51 | 4.61e-01 | 4.59e-01 | 3.89e-21 |
| 260.00 | 1.30e-21 | 4.06 | 1.36e+00 | 1.36e+00 | 7.15e-21 |
| 270.00 | 9.21e-22 | 3.69 | 3.72e+00 | 3.71e+00 | 1.26e-20 |
| 280.00 | 6.72e-22 | 3.41 | 9.46e+00 | 9.41e+00 | 2.16e-20 |
| 290.00 | 5.03e-22 | 3.17 | 2.26e+01 | 2.24e+01 | 3.57e-20 |
| 298.00 | 4.06e-22 | 2.99 | 4.33e+01 | 4.31e+01 | 5.24e-20 |
| 300.00 | 3.85e-22 | 2.95 | 5.07e+01 | 5.05e+01 | 5.74e-20 |
| 310.00 | 3.01e-22 | 2.77 | 1.08e+02 | 1.08e+02 | 9.00e-20 |
| 320.00 | 2.39e-22 | 2.62 | 2.21e+02 | 2.19e+02 | 1.37e-19 |

S=0.153, 0.305, 0.6210, 0.915, 1.526, 2.136, 2.441, 3.052, 3.662, 4.578, at both sides of the IRC

### HTS8a

| T      | Keq      | tunn | ktst     | kcvt     | kt       |
|--------|----------|------|----------|----------|----------|
| 220.00 | 5.92e-18 | 2.41 | 2.20e+03 | 1.44e+03 | 2.06e-14 |
| 230.00 | 2.67e-18 | 2.10 | 5.98e+03 | 3.95e+03 | 2.22e-14 |
| 240.00 | 1.29e-18 | 1.89 | 1.50e+04 | 9.93e+03 | 2.43e-14 |

|        |          |      |          |          |          |
|--------|----------|------|----------|----------|----------|
| 250.00 | 6.65e-19 | 1.72 | 3.48e+04 | 2.32e+04 | 2.66e-14 |
| 260.00 | 3.61e-19 | 1.59 | 7.59e+04 | 5.09e+04 | 2.92e-14 |
| 270.00 | 2.05e-19 | 1.50 | 1.56e+05 | 1.05e+05 | 3.22e-14 |
| 280.00 | 1.22e-19 | 1.40 | 3.06e+05 | 2.07e+05 | 3.53e-14 |
| 290.00 | 7.50e-20 | 1.33 | 5.73e+05 | 3.88e+05 | 3.87e-14 |
| 298.00 | 5.22e-20 | 1.28 | 9.17e+05 | 6.23e+05 | 4.17e-14 |
| 300.00 | 4.79e-20 | 1.27 | 1.03e+06 | 6.99e+05 | 4.25e-14 |
| 310.00 | 3.15e-20 | 1.22 | 1.78e+06 | 1.21e+06 | 4.66e-14 |
| 320.00 | 2.13e-20 | 1.18 | 2.97e+06 | 2.03e+06 | 5.10e-14 |

S= 0.161, 0.323, 0.645, 0.968, 1.613, 2.259, 2.581, 3.227, 3.872, 4.840, at both sides of the IRC

### HTS8b

| T      | Keq      | tunn | ktst     | kcvt     | kt       |
|--------|----------|------|----------|----------|----------|
| 220.00 | 5.92e-18 | 5.11 | 1.16e-12 | 6.10e-13 | 1.85e-29 |
| 230.00 | 2.67e-18 | 3.15 | 5.18e-12 | 2.75e-12 | 2.32e-29 |
| 240.00 | 1.29e-18 | 2.48 | 2.04e-11 | 1.09e-11 | 3.49e-29 |
| 250.00 | 6.65e-19 | 2.13 | 7.23e-11 | 3.90e-11 | 5.52e-29 |
| 260.00 | 3.61e-19 | 1.91 | 2.32e-10 | 1.27e-10 | 8.72e-29 |
| 270.00 | 2.05e-19 | 1.76 | 6.86e-10 | 3.77e-10 | 1.36e-28 |
| 280.00 | 1.22e-19 | 1.63 | 1.88e-09 | 1.04e-09 | 2.07e-28 |
| 290.00 | 7.50e-20 | 1.54 | 4.80e-09 | 2.67e-09 | 3.09e-28 |
| 298.00 | 5.22e-20 | 1.48 | 9.73e-09 | 5.43e-09 | 4.20e-28 |
| 300.00 | 4.79e-20 | 1.46 | 1.15e-08 | 6.45e-09 | 4.52e-28 |
| 310.00 | 3.15e-20 | 1.40 | 2.63e-08 | 1.47e-08 | 6.49e-28 |
| 320.00 | 2.13e-20 | 1.34 | 5.68e-08 | 3.20e-08 | 9.15e-28 |

S= 0.161, 0.323, 0.645, 0.968, 1.613, 2.259, 2.581, 3.227, 3.872, 4.840, at both sides of the IRC

### Reactions starting by HSSCOOH + OH

#### BTS1a

| T      | Keq      | ktst     | kt       |
|--------|----------|----------|----------|
| 220.00 | 1.21e-23 | 2.26e+10 | 2.73e-13 |
| 230.00 | 1.18e-23 | 2.34e+10 | 2.78e-13 |
| 240.00 | 1.17e-23 | 2.42e+10 | 2.82e-13 |
| 250.00 | 1.15e-23 | 2.49e+10 | 2.88e-13 |
| 260.00 | 1.15e-23 | 2.56e+10 | 2.93e-13 |
| 270.00 | 1.14e-23 | 2.62e+10 | 2.99e-13 |
| 280.00 | 1.14e-23 | 2.67e+10 | 3.05e-13 |
| 290.00 | 1.15e-23 | 2.72e+10 | 3.11e-13 |
| 298.00 | 1.15e-23 | 2.75e+10 | 3.17e-13 |
| 300.00 | 1.15e-23 | 2.76e+10 | 3.18e-13 |
| 310.00 | 1.16e-23 | 2.80e+10 | 3.25e-13 |
| 320.00 | 1.17e-23 | 2.84e+10 | 3.32e-13 |

Conventional TST only

#### Reverse-BTS1a

| T | Keq | ktst | kt |
|---|-----|------|----|
|---|-----|------|----|

|        |          |          |          |
|--------|----------|----------|----------|
| 220.00 | 6.51e-24 | 2.22e+03 | 1.44e-20 |
| 230.00 | 4.62e-24 | 5.67e+03 | 2.62e-20 |
| 240.00 | 3.39e-24 | 1.34e+04 | 4.54e-20 |
| 250.00 | 2.56e-24 | 2.97e+04 | 7.61e-20 |
| 260.00 | 1.99e-24 | 6.17e+04 | 1.23e-19 |
| 270.00 | 1.57e-24 | 1.22e+05 | 1.92e-19 |
| 280.00 | 1.27e-24 | 2.29e+05 | 2.92e-19 |
| 290.00 | 1.05e-24 | 4.13e+05 | 4.33e-19 |
| 298.00 | 9.09e-25 | 6.43e+05 | 5.85e-19 |
| 300.00 | 8.79e-25 | 7.16e+05 | 6.29e-19 |
| 310.00 | 7.46e-25 | 1.20e+06 | 8.95e-19 |
| 320.00 | 6.42e-25 | 1.94e+06 | 1.25e-18 |

Conventional TST only

### BTS1b

| T      | Keq      | ktst     | kt       |
|--------|----------|----------|----------|
| 220.00 | 2.95e-22 | 1.32e+10 | 3.89e-12 |
| 230.00 | 2.52e-22 | 1.41e+10 | 3.55e-12 |
| 240.00 | 2.19e-22 | 1.49e+10 | 3.27e-12 |
| 250.00 | 1.94e-22 | 1.57e+10 | 3.04e-12 |
| 260.00 | 1.73e-22 | 1.64e+10 | 2.84e-12 |
| 270.00 | 1.56e-22 | 1.71e+10 | 2.68e-12 |
| 280.00 | 1.43e-22 | 1.78e+10 | 2.54e-12 |
| 290.00 | 1.32e-22 | 1.84e+10 | 2.42e-12 |
| 298.00 | 1.24e-22 | 1.89e+10 | 2.35e-12 |
| 300.00 | 1.22e-22 | 1.90e+10 | 2.32e-12 |
| 310.00 | 1.14e-22 | 1.96e+10 | 2.24e-12 |
| 320.00 | 1.08e-22 | 2.01e+10 | 2.17e-12 |

Conventional TST only

### Reverse-BTS1b

| T      | Keq      | ktst     | kt       |
|--------|----------|----------|----------|
| 220.00 | 6.51e-24 | 2.22e+03 | 1.44e-20 |
| 230.00 | 4.62e-24 | 5.67e+03 | 2.62e-20 |
| 240.00 | 3.39e-24 | 1.34e+04 | 4.54e-20 |
| 250.00 | 2.56e-24 | 2.97e+04 | 7.61e-20 |
| 260.00 | 1.99e-24 | 6.17e+04 | 1.23e-19 |
| 270.00 | 1.57e-24 | 1.22e+05 | 1.92e-19 |
| 280.00 | 1.27e-24 | 2.29e+05 | 2.92e-19 |
| 290.00 | 1.05e-24 | 4.13e+05 | 4.33e-19 |
| 298.00 | 9.09e-25 | 6.43e+05 | 5.85e-19 |
| 300.00 | 8.79e-25 | 7.16e+05 | 6.29e-19 |
| 310.00 | 7.46e-25 | 1.20e+06 | 8.95e-19 |
| 320.00 | 6.42e-25 | 1.94e+06 | 1.25e-18 |

Conventional TST only

### FTS1a

| T      | Keq      | ktst     | kcvt     | kt       |
|--------|----------|----------|----------|----------|
| 220.00 | 5.54e-20 | 6.79e-03 | 6.75e-03 | 3.74e-22 |



|        |          |          |          |          |
|--------|----------|----------|----------|----------|
| 230.00 | 3.32e-20 | 2.58e-02 | 2.57e-02 | 8.54e-22 |
| 240.00 | 2.09e-20 | 8.76e-02 | 8.71e-02 | 1.82e-21 |
| 250.00 | 1.36e-20 | 2.69e-01 | 2.68e-01 | 3.65e-21 |
| 260.00 | 9.21e-21 | 7.58e-01 | 7.55e-01 | 6.95e-21 |
| 270.00 | 6.43e-21 | 1.98e+00 | 1.97e+00 | 1.27e-20 |
| 280.00 | 4.61e-21 | 4.80e+00 | 4.78e+00 | 2.20e-20 |
| 290.00 | 3.39e-21 | 1.10e+01 | 1.09e+01 | 3.70e-20 |
| 298.00 | 2.70e-21 | 2.04e+01 | 2.03e+01 | 5.47e-20 |
| 300.00 | 2.55e-21 | 2.37e+01 | 2.36e+01 | 6.02e-20 |
| 310.00 | 1.96e-21 | 4.86e+01 | 4.84e+01 | 9.48e-20 |
| 320.00 | 1.53e-21 | 9.53e+01 | 9.49e+01 | 1.45e-19 |

S= 0.149, 0.299, 0.599, 0.899, 1.499, 2.099, 2.399, 2.999, 3.599, 4.499, at both sides of the IRC

### FTS1b

| T      | Keq      | ktst     | kcvt     | kt       |
|--------|----------|----------|----------|----------|
| 220.00 | 5.77e-23 | 1.66e+05 | 7.43e+04 | 4.29e-18 |
| 230.00 | 4.96e-23 | 2.95e+05 | 1.34e+05 | 6.65e-18 |
| 240.00 | 4.34e-23 | 4.99e+05 | 2.30e+05 | 9.97e-18 |
| 250.00 | 3.84e-23 | 8.08e+05 | 3.78e+05 | 1.45e-17 |
| 260.00 | 3.45e-23 | 1.26e+06 | 5.96e+05 | 2.05e-17 |
| 270.00 | 3.13e-23 | 1.90e+06 | 9.07e+05 | 2.84e-17 |
| 280.00 | 2.86e-23 | 2.77e+06 | 1.34e+06 | 3.84e-17 |
| 290.00 | 2.65e-23 | 3.95e+06 | 1.92e+06 | 5.08e-17 |
| 298.00 | 2.50e-23 | 5.14e+06 | 2.52e+06 | 6.30e-17 |
| 300.00 | 2.46e-23 | 5.48e+06 | 2.69e+06 | 6.63e-17 |
| 310.00 | 2.31e-23 | 7.44e+06 | 3.67e+06 | 8.48e-17 |
| 320.00 | 2.18e-23 | 9.90e+06 | 4.92e+06 | 1.07e-16 |

S= 0.149, 0.299, 0.599, 0.899, 1.499, 2.099, 2.399, 2.999, 3.599, 4.499, at both sides of the IRC

### BTS2a

| T      | Keq      | ktst     | kt       |
|--------|----------|----------|----------|
| 220.00 | 6.80e-23 | 5.76e+07 | 3.92e-15 |
| 230.00 | 5.69e-23 | 8.24e+07 | 4.69e-15 |
| 240.00 | 4.85e-23 | 1.14e+08 | 5.53e-15 |
| 250.00 | 4.20e-23 | 1.55e+08 | 6.51e-15 |
| 260.00 | 3.69e-23 | 2.04e+08 | 7.53e-15 |
| 270.00 | 3.28e-23 | 2.63e+08 | 8.63e-15 |
| 280.00 | 2.95e-23 | 3.34e+08 | 9.87e-15 |
| 290.00 | 2.68e-23 | 4.16e+08 | 1.12e-14 |
| 298.00 | 2.50e-23 | 4.91e+08 | 1.23e-14 |
| 300.00 | 2.46e-23 | 5.11e+08 | 1.26e-14 |
| 310.00 | 2.28e-23 | 6.19e+08 | 1.41e-14 |
| 320.00 | 2.12e-23 | 7.40e+08 | 1.57e-14 |

Conventional TST only

### FTS2a

| T      | Keq      | ktst     | kcvt     | kt       |
|--------|----------|----------|----------|----------|
| 220.00 | 3.60e-22 | 2.34e+02 | 2.14e+02 | 7.70e-20 |
| 230.00 | 2.69e-22 | 5.76e+02 | 5.26e+02 | 1.42e-19 |
| 240.00 | 2.07e-22 | 1.31e+03 | 1.20e+03 | 2.49e-19 |
| 250.00 | 1.63e-22 | 2.80e+03 | 2.56e+03 | 4.18e-19 |
| 260.00 | 1.32e-22 | 5.62e+03 | 5.14e+03 | 6.77e-19 |
| 270.00 | 1.08e-22 | 1.07e+04 | 9.81e+03 | 1.06e-18 |
| 280.00 | 9.03e-23 | 1.95e+04 | 1.79e+04 | 1.62e-18 |
| 290.00 | 7.65e-23 | 3.40e+04 | 3.12e+04 | 2.39e-18 |
| 298.00 | 6.77e-23 | 5.16e+04 | 4.74e+04 | 3.21e-18 |
| 300.00 | 6.57e-23 | 5.71e+04 | 5.24e+04 | 3.44e-18 |
| 310.00 | 5.72e-23 | 9.27e+04 | 8.52e+04 | 4.87e-18 |
| 320.00 | 5.02e-23 | 1.46e+05 | 1.34e+05 | 6.73e-18 |

S= 0.149, 0.299, 0.599, 0.899, 1.499, 2.099, 2.399, 2.999, 3.599, 4.499, at both sides of the IRC

### FTS2b

| T      | Keq      | ktst     | kcvt     | kt       |
|--------|----------|----------|----------|----------|
| 220.00 | 6.80e-23 | 1.50e+04 | 1.35e+04 | 9.18e-19 |
| 230.00 | 5.69e-23 | 2.96e+04 | 2.66e+04 | 1.51e-18 |
| 240.00 | 4.85e-23 | 5.53e+04 | 4.98e+04 | 2.41e-18 |
| 250.00 | 4.20e-23 | 9.80e+04 | 8.83e+04 | 3.71e-18 |
| 260.00 | 3.69e-23 | 1.66e+05 | 1.50e+05 | 5.53e-18 |
| 270.00 | 3.28e-23 | 2.71e+05 | 2.44e+05 | 8.01e-18 |
| 280.00 | 2.95e-23 | 4.25e+05 | 3.83e+05 | 1.13e-17 |
| 290.00 | 2.68e-23 | 6.47e+05 | 5.83e+05 | 1.57e-17 |
| 298.00 | 2.50e-23 | 8.86e+05 | 7.99e+05 | 2.00e-17 |
| 300.00 | 2.46e-23 | 9.56e+05 | 8.62e+05 | 2.12e-17 |
| 310.00 | 2.28e-23 | 1.38e+06 | 1.24e+06 | 2.82e-17 |
| 320.00 | 2.12e-23 | 1.94e+06 | 1.75e+06 | 3.71e-17 |

S= 0.149, 0.299, 0.599, 0.899, 1.499, 2.099, 2.399, 2.999, 3.599, 4.499, at both sides of the IRC

### HTS3a

| T      | Keq      | tunn | ktst     | kcvt     | kt       |
|--------|----------|------|----------|----------|----------|
| 220.00 | 4.71e-20 | 1.72 | 7.63e+08 | 6.09e+08 | 4.95e-11 |
| 230.00 | 2.83e-20 | 1.64 | 1.10e+09 | 9.12e+08 | 4.24e-11 |
| 240.00 | 1.78e-20 | 1.56 | 1.54e+09 | 1.32e+09 | 3.66e-11 |
| 250.00 | 1.16e-20 | 1.49 | 2.10e+09 | 1.86e+09 | 3.22e-11 |
| 260.00 | 7.86e-21 | 1.43 | 2.79e+09 | 2.55e+09 | 2.87e-11 |
| 270.00 | 5.48e-21 | 1.38 | 3.64e+09 | 3.41e+09 | 2.58e-11 |
| 280.00 | 3.94e-21 | 1.33 | 4.66e+09 | 4.48e+09 | 2.35e-11 |
| 290.00 | 2.90e-21 | 0.78 | 5.86e+09 | 5.68e+09 | 1.28e-11 |
| 298.00 | 2.30e-21 | 0.77 | 6.97e+09 | 6.75e+09 | 1.20e-11 |
| 300.00 | 2.18e-21 | 0.77 | 7.26e+09 | 7.04e+09 | 1.19e-11 |
| 310.00 | 1.67e-21 | 0.77 | 8.88e+09 | 8.60e+09 | 1.11e-11 |
| 320.00 | 1.31e-21 | 0.76 | 1.07e+10 | 1.04e+10 | 1.04e-11 |

S= 0.190, 0.381, 0.762, 1.141, 1.190, 2.665, 3.046, 3.807, 4.566, 5.704, at both sides of the IRC

**HTS3b**

| T      | Keq      | tunn | ktst     | kcvt     | kt       |
|--------|----------|------|----------|----------|----------|
| 220.00 | 4.71e-20 | 2.33 | 1.16e+11 | 6.58e+10 | 7.21e-09 |
| 230.00 | 2.83e-20 | 2.18 | 1.21e+11 | 7.17e+10 | 4.41e-09 |
| 240.00 | 1.78e-20 | 2.05 | 1.26e+11 | 7.74e+10 | 2.82e-09 |
| 250.00 | 1.16e-20 | 1.95 | 1.31e+11 | 8.31e+10 | 1.88e-09 |
| 260.00 | 7.86e-21 | 1.86 | 1.36e+11 | 8.87e+10 | 1.30e-09 |
| 270.00 | 5.48e-21 | 1.79 | 1.40e+11 | 9.41e+10 | 9.21e-10 |
| 280.00 | 3.94e-21 | 1.72 | 1.45e+11 | 9.94e+10 | 6.73e-10 |
| 290.00 | 2.90e-21 | 1.66 | 1.49e+11 | 1.05e+11 | 5.04e-10 |
| 298.00 | 2.30e-21 | 1.61 | 1.52e+11 | 1.09e+11 | 4.05e-10 |
| 300.00 | 2.18e-21 | 1.60 | 1.52e+11 | 1.10e+11 | 3.84e-10 |
| 310.00 | 1.67e-21 | 1.57 | 1.56e+11 | 1.14e+11 | 3.00e-10 |
| 320.00 | 1.31e-21 | 1.52 | 1.59e+11 | 1.19e+11 | 2.37e-10 |

S=0.160, 0.320, 0.642, 0.962, 1.604, 2.247, 2.568, 3.209, 3.851, 4.813, at both sides of the IRC

**PTS12a**

| T      | Keq      | tunn   | ktst     | kcvt     | kt       |
|--------|----------|--------|----------|----------|----------|
| 220.00 | 1.93e-18 | 831.17 | 2.38e+03 | 2.31e+03 | 3.70e-12 |
| 230.00 | 9.31e-19 | 490.02 | 5.67e+03 | 5.51e+03 | 2.51e-12 |
| 240.00 | 4.79e-19 | 307.38 | 1.26e+04 | 1.22e+04 | 1.80e-12 |
| 250.00 | 2.60e-19 | 201.57 | 2.61e+04 | 2.54e+04 | 1.33e-12 |
| 260.00 | 1.49e-19 | 138.76 | 5.12e+04 | 4.98e+04 | 1.03e-12 |
| 270.00 | 8.85e-20 | 98.92  | 9.55e+04 | 9.29e+04 | 8.14e-13 |
| 280.00 | 5.48e-20 | 72.89  | 1.70e+05 | 1.66e+05 | 6.64e-13 |
| 290.00 | 3.52e-20 | 55.28  | 2.92e+05 | 2.84e+05 | 5.52e-13 |
| 298.00 | 2.52e-20 | 45.07  | 4.37e+05 | 4.26e+05 | 4.84e-13 |
| 300.00 | 2.33e-20 | 42.86  | 4.82e+05 | 4.69e+05 | 4.68e-13 |
| 310.00 | 1.58e-20 | 34.09  | 7.71e+05 | 7.51e+05 | 4.05e-13 |
| 320.00 | 1.11e-20 | 27.76  | 1.20e+06 | 1.16e+06 | 3.56e-13 |

S= 0.160, 0.320, 0.636, 0.959, 1.599, 2.238, 2.558, 3.198, 3.838, 4.796, at both sides of the IRC

**PTS12b**

| T      | Keq      | tunn   | ktst     | kcvt     | kt       |
|--------|----------|--------|----------|----------|----------|
| 220.00 | 1.93e-18 | 847.95 | 1.74e+03 | 1.71e+03 | 2.79e-12 |
| 230.00 | 9.31e-19 | 498.79 | 4.20e+03 | 4.13e+03 | 1.92e-12 |
| 240.00 | 4.79e-19 | 311.42 | 9.42e+03 | 9.28e+03 | 1.38e-12 |
| 250.00 | 2.60e-19 | 204.10 | 1.98e+04 | 1.95e+04 | 1.04e-12 |
| 260.00 | 1.49e-19 | 140.05 | 3.93e+04 | 3.87e+04 | 8.05e-13 |
| 270.00 | 8.85e-20 | 99.86  | 7.40e+04 | 7.29e+04 | 6.45e-13 |
| 280.00 | 5.48e-20 | 73.66  | 1.33e+05 | 1.31e+05 | 5.29e-13 |
| 290.00 | 3.52e-20 | 55.51  | 2.30e+05 | 2.27e+05 | 4.43e-13 |
| 298.00 | 2.52e-20 | 45.32  | 3.47e+05 | 3.42e+05 | 3.91e-13 |
| 300.00 | 2.33e-20 | 43.12  | 3.83e+05 | 3.78e+05 | 3.79e-13 |
| 310.00 | 1.58e-20 | 34.32  | 6.17e+05 | 6.09e+05 | 3.31e-13 |
| 320.00 | 1.11e-20 | 27.87  | 9.64e+05 | 9.51e+05 | 2.93e-13 |

S= 0.160, 0.320, 0.636, 0.959, 1.599, 2.238, 2.558, 3.198, 3.838, 4.796, at both sides of the IRC

**HTS5a**

| T      | Keq      | tunn | ktst     | kcvt     | kt       |
|--------|----------|------|----------|----------|----------|
| 220.00 | 1.35e-22 | 0.99 | 6.83e+06 | 1.76e+06 | 2.35e-16 |
| 230.00 | 1.00e-22 | 0.96 | 1.06e+07 | 2.78e+06 | 2.67e-16 |
| 240.00 | 7.65e-23 | 0.93 | 1.57e+07 | 4.23e+06 | 3.01e-16 |
| 250.00 | 5.99e-23 | 0.91 | 2.27e+07 | 6.22e+06 | 3.38e-16 |
| 260.00 | 4.80e-23 | 0.89 | 3.18e+07 | 8.87e+06 | 3.78e-16 |
| 270.00 | 3.93e-23 | 0.87 | 4.35e+07 | 1.23e+07 | 4.20e-16 |
| 280.00 | 3.27e-23 | 0.86 | 5.81e+07 | 1.67e+07 | 4.68e-16 |
| 290.00 | 2.77e-23 | 0.85 | 7.61e+07 | 2.21e+07 | 5.21e-16 |
| 298.00 | 2.45e-23 | 0.84 | 9.32e+07 | 2.74e+07 | 5.64e-16 |
| 300.00 | 2.38e-23 | 0.84 | 9.79e+07 | 2.88e+07 | 5.76e-16 |
| 310.00 | 2.07e-23 | 0.83 | 1.24e+08 | 3.69e+07 | 6.35e-16 |
| 320.00 | 1.82e-23 | 0.82 | 1.55e+08 | 4.65e+07 | 6.98e-16 |

S=0.173, 0.345, 0.690, 1.035, 1.725, 2.415, 2.761, 3.451, 4.141, 5.176, at both sides of the IRC

**HTS6a**

| T      | Keq      | tunn   | ktst     | kcvt     | kt       |
|--------|----------|--------|----------|----------|----------|
| 220.00 | 9.59e-21 | 637.27 | 7.16e+06 | 7.03e+06 | 4.30e-11 |
| 230.00 | 5.14e-21 | 379.23 | 1.33e+07 | 1.30e+07 | 2.54e-11 |
| 240.00 | 2.92e-21 | 237.12 | 2.34e+07 | 2.29e+07 | 1.58e-11 |
| 250.00 | 1.74e-21 | 154.78 | 3.94e+07 | 3.87e+07 | 1.04e-11 |
| 260.00 | 1.08e-21 | 105.26 | 6.39e+07 | 6.27e+07 | 7.13e-12 |
| 270.00 | 6.99e-22 | 74.31  | 1.00e+08 | 9.81e+07 | 5.10e-12 |
| 280.00 | 4.68e-22 | 54.03  | 1.52e+08 | 1.49e+08 | 3.76e-12 |
| 290.00 | 3.23e-22 | 40.41  | 2.25e+08 | 2.20e+08 | 2.87e-12 |
| 298.00 | 2.45e-22 | 32.68  | 3.01e+08 | 2.95e+08 | 2.36e-12 |
| 300.00 | 2.29e-22 | 31.01  | 3.24e+08 | 3.17e+08 | 2.25e-12 |
| 310.00 | 1.66e-22 | 24.44  | 4.56e+08 | 4.46e+08 | 1.81e-12 |
| 320.00 | 1.24e-22 | 19.54  | 6.29e+08 | 6.14e+08 | 1.49e-12 |

S=0.154, 0.307, 0.614, 0.921, 1.535, 2.150, 2.457, 3.071, 3.686, 4.607, at both sides of the IRC

**HTS8a**

| T      | Keq      | tunn     | ktst     | kcvt     | kt       |
|--------|----------|----------|----------|----------|----------|
| 220.00 | 6.94e-20 | 57803.03 | 3.41e+00 | 1.32e+00 | 5.30e-15 |
| 230.00 | 4.06e-20 | 27702.70 | 1.13e+01 | 4.44e+00 | 5.00e-15 |
| 240.00 | 2.49e-20 | 14328.36 | 3.39e+01 | 1.34e+01 | 4.79e-15 |
| 250.00 | 1.60e-20 | 7882.04  | 9.33e+01 | 3.73e+01 | 4.69e-15 |
| 260.00 | 1.06e-20 | 4576.80  | 2.37e+02 | 9.57e+01 | 4.65e-15 |
| 270.00 | 7.28e-21 | 2790.39  | 5.64e+02 | 2.29e+02 | 4.65e-15 |
| 280.00 | 5.15e-21 | 1776.26  | 1.26e+03 | 5.14e+02 | 4.70e-15 |
| 290.00 | 3.73e-21 | 1174.31  | 2.66e+03 | 1.09e+03 | 4.78e-15 |
| 298.00 | 2.94e-21 | 860.10   | 4.67e+03 | 1.93e+03 | 4.88e-15 |
| 300.00 | 2.77e-21 | 796.38   | 5.35e+03 | 2.21e+03 | 4.88e-15 |

|        |          |        |          |          |          |
|--------|----------|--------|----------|----------|----------|
| 310.00 | 2.10e-21 | 559.72 | 1.03e+04 | 4.27e+03 | 5.03e-15 |
| 320.00 | 1.63e-21 | 404.04 | 1.90e+04 | 7.92e+03 | 5.21e-15 |

S=0.156, 0.311, 0.623, 0.935, 1.558, 2.182, 2.493, 3.116, 3.739, at both sides of the IRC

### HTS8b

| T      | Keq      | tunn     | ktst     | kcvt     | kt       |
|--------|----------|----------|----------|----------|----------|
| 220.00 | 6.94e-20 | 92059.55 | 1.09e+01 | 4.03e+00 | 2.58e-14 |
| 230.00 | 4.06e-20 | 43281.25 | 3.40e+01 | 1.28e+01 | 2.25e-14 |
| 240.00 | 2.49e-20 | 22010.87 | 9.68e+01 | 3.68e+01 | 2.02e-14 |
| 250.00 | 1.60e-20 | 11909.65 | 2.53e+02 | 9.74e+01 | 1.85e-14 |
| 260.00 | 1.06e-20 | 6820.08  | 6.16e+02 | 2.39e+02 | 1.73e-14 |
| 270.00 | 7.28e-21 | 4098.36  | 1.40e+03 | 5.49e+02 | 1.64e-14 |
| 280.00 | 5.15e-21 | 2554.62  | 3.01e+03 | 1.19e+03 | 1.56e-14 |
| 290.00 | 3.73e-21 | 1663.93  | 6.14e+03 | 2.44e+03 | 1.52e-14 |
| 298.00 | 2.94e-21 | 1207.64  | 1.05e+04 | 4.19e+03 | 1.49e-14 |
| 300.00 | 2.77e-21 | 1119.50  | 1.19e+04 | 4.77e+03 | 1.48e-14 |
| 310.00 | 2.10e-21 | 774.30   | 2.23e+04 | 8.95e+03 | 1.46e-14 |
| 320.00 | 1.63e-21 | 551.55   | 3.99e+04 | 1.61e+04 | 1.45e-14 |

S=0.156, 0.311, 0.623, 0.935, 1.558, 2.182, 2.493, 3.116, 3.739, at both sides of the IRC

### Reactions starting by HSSCN + OH

#### BTS1a

| T      | Keq      | ktst     | kcvt     | kt       |
|--------|----------|----------|----------|----------|
| 220.00 | 7.58e-21 | 1.66e+09 | 1.14e+09 | 8.64e-12 |
| 230.00 | 5.11e-21 | 2.14e+09 | 1.48e+09 | 7.56e-12 |
| 240.00 | 3.57e-21 | 2.71e+09 | 1.87e+09 | 6.68e-12 |
| 250.00 | 2.58e-21 | 3.36e+09 | 2.32e+09 | 5.99e-12 |
| 260.00 | 1.92e-21 | 4.09e+09 | 2.82e+09 | 5.40e-12 |
| 270.00 | 1.46e-21 | 4.91e+09 | 3.38e+09 | 4.93e-12 |
| 280.00 | 1.14e-21 | 5.81e+09 | 4.00e+09 | 4.54e-12 |
| 290.00 | 9.01e-22 | 6.80e+09 | 4.67e+09 | 4.21e-12 |
| 298.00 | 7.59e-22 | 7.65e+09 | 5.24e+09 | 3.98e-12 |
| 300.00 | 7.29e-22 | 7.87e+09 | 5.39e+09 | 3.93e-12 |
| 310.00 | 5.98e-22 | 9.01e+09 | 6.16e+09 | 3.69e-12 |
| 320.00 | 4.99e-22 | 1.02e+10 | 6.98e+09 | 3.48e-12 |

S= 0.145, 0.292, 0.592, 0.891, 1.491, 2.090, 2.389, 2.988, 3.586, 4.4667, at both sides of the IRC

#### Reverse BTS1a

| T      | Keq      | ktst     | kt       |
|--------|----------|----------|----------|
| 220.00 | 2.16e-22 | 2.08e-02 | 4.49e-24 |
| 230.00 | 1.72e-22 | 7.62e-02 | 1.31e-23 |
| 240.00 | 1.41e-22 | 2.50e-01 | 3.52e-23 |
| 250.00 | 1.17e-22 | 7.47e-01 | 8.77e-23 |
| 260.00 | 9.96e-23 | 2.05e+00 | 2.04e-22 |

|        |          |          |          |
|--------|----------|----------|----------|
| 270.00 | 8.59e-23 | 5.24e+00 | 4.50e-22 |
| 280.00 | 7.51e-23 | 1.25e+01 | 9.38e-22 |
| 290.00 | 6.64e-23 | 2.82e+01 | 1.87e-21 |
| 298.00 | 6.07e-23 | 5.20e+01 | 3.16e-21 |
| 300.00 | 5.94e-23 | 6.03e+01 | 3.58e-21 |
| 310.00 | 5.36e-23 | 1.23e+02 | 6.60e-21 |
| 320.00 | 4.89e-23 | 2.39e+02 | 1.17e-20 |

Conventional TST only

### BTS1b

| T      | Keq      | ktst     | kcvt     | kt       |
|--------|----------|----------|----------|----------|
| 220.00 | 1.24e-21 | 2.90e+09 | 1.90e+09 | 2.36e-12 |
| 230.00 | 1.00e-21 | 3.28e+09 | 2.16e+09 | 2.16e-12 |
| 240.00 | 8.26e-22 | 3.66e+09 | 2.43e+09 | 2.01e-12 |
| 250.00 | 6.94e-22 | 4.05e+09 | 2.71e+09 | 1.88e-12 |
| 260.00 | 5.94e-22 | 4.44e+09 | 2.98e+09 | 1.77e-12 |
| 270.00 | 5.15e-22 | 4.83e+09 | 3.26e+09 | 1.68e-12 |
| 280.00 | 4.53e-22 | 5.21e+09 | 3.54e+09 | 1.60e-12 |
| 290.00 | 4.03e-22 | 5.59e+09 | 3.81e+09 | 1.54e-12 |
| 298.00 | 3.70e-22 | 5.89e+09 | 4.03e+09 | 1.49e-12 |
| 300.00 | 3.63e-22 | 5.97e+09 | 4.08e+09 | 1.48e-12 |
| 310.00 | 3.29e-22 | 6.34e+09 | 4.35e+09 | 1.43e-12 |
| 320.00 | 3.01e-22 | 6.70e+09 | 4.61e+09 | 1.39e-12 |

S= 0.473, 0.947, 1.894, 2.841, 3.313, 3.786, 4.731, 5.109, at both sides of the IRC

### Reverse BTS1b

| T      | Keq      | ktst     | kt       |
|--------|----------|----------|----------|
| 220.00 | 2.16e-22 | 6.18e-03 | 1.33e-24 |
| 230.00 | 1.72e-22 | 2.36e-02 | 4.07e-24 |
| 240.00 | 1.41e-22 | 8.10e-02 | 1.14e-23 |
| 250.00 | 1.17e-22 | 2.51e-01 | 2.95e-23 |
| 260.00 | 9.96e-23 | 7.16e-01 | 7.13e-23 |
| 270.00 | 8.59e-23 | 1.89e+00 | 1.62e-22 |
| 280.00 | 7.51e-23 | 4.66e+00 | 3.50e-22 |
| 290.00 | 6.64e-23 | 1.08e+01 | 7.17e-22 |
| 298.00 | 6.07e-23 | 2.03e+01 | 1.23e-21 |
| 300.00 | 5.94e-23 | 2.37e+01 | 1.41e-21 |
| 310.00 | 5.36e-23 | 4.94e+01 | 2.65e-21 |
| 320.00 | 4.89e-23 | 9.84e+01 | 4.81e-21 |

Conventional TST only

### BTS2a

| T      | Keq      | ktst     | kcvt     | kt       |
|--------|----------|----------|----------|----------|
| 220.00 | 9.67e-21 | 2.42e+07 | 1.94e+07 | 1.88e-13 |
| 230.00 | 6.48e-21 | 3.56e+07 | 2.87e+07 | 1.86e-13 |
| 240.00 | 4.50e-21 | 5.07e+07 | 4.09e+07 | 1.84e-13 |
| 250.00 | 3.22e-21 | 7.02e+07 | 5.68e+07 | 1.83e-13 |
| 260.00 | 2.37e-21 | 9.49e+07 | 7.68e+07 | 1.82e-13 |
| 270.00 | 1.79e-21 | 1.25e+08 | 1.02e+08 | 1.83e-13 |

|        |          |          |          |          |
|--------|----------|----------|----------|----------|
| 280.00 | 1.39e-21 | 1.62e+08 | 1.32e+08 | 1.83e-13 |
| 290.00 | 1.09e-21 | 2.07e+08 | 1.68e+08 | 1.83e-13 |
| 298.00 | 9.13e-22 | 2.48e+08 | 2.01e+08 | 1.84e-13 |
| 300.00 | 8.75e-22 | 2.59e+08 | 2.10e+08 | 1.84e-13 |
| 310.00 | 7.13e-22 | 3.20e+08 | 2.60e+08 | 1.85e-13 |
| 320.00 | 5.90e-22 | 3.89e+08 | 3.17e+08 | 1.87e-13 |

S=0.307, 0.614, 1.229, 1.844, 3.073, 4.302, 4.916, -0.307, -0.614, -1.229, -1.844, -3.073, -4.302, -4.916, -6.1467, -7.374, -9.217

### Reverse BTS2a

| T      | Keq      | ktst     | kt       |
|--------|----------|----------|----------|
| 220.00 | 4.23e-22 | 1.46e+00 | 6.17e-22 |
| 230.00 | 3.39e-22 | 4.23e+00 | 1.43e-21 |
| 240.00 | 2.77e-22 | 1.12e+01 | 3.11e-21 |
| 250.00 | 2.32e-22 | 2.74e+01 | 6.35e-21 |
| 260.00 | 1.97e-22 | 6.25e+01 | 1.23e-20 |
| 270.00 | 1.70e-22 | 1.34e+02 | 2.28e-20 |
| 280.00 | 1.49e-22 | 2.73e+02 | 4.07e-20 |
| 290.00 | 1.32e-22 | 5.28e+02 | 6.97e-20 |
| 298.00 | 1.21e-22 | 8.68e+02 | 1.05e-19 |
| 300.00 | 1.18e-22 | 9.78e+02 | 1.16e-19 |
| 310.00 | 1.07e-22 | 1.74e+03 | 1.86e-19 |
| 320.00 | 9.75e-23 | 2.99e+03 | 2.91e-19 |

Conventional TST only

### BTS2b

| T      | Keq      | ktst     | kcvt     | kt       |
|--------|----------|----------|----------|----------|
| 220.00 | 9.17e-21 | 1.70e+06 | 1.57e+06 | 1.44e-14 |
| 230.00 | 6.15e-21 | 2.87e+06 | 2.65e+06 | 1.63e-14 |
| 240.00 | 4.27e-21 | 4.63e+06 | 4.26e+06 | 1.82e-14 |
| 250.00 | 3.06e-21 | 7.18e+06 | 6.62e+06 | 2.03e-14 |
| 260.00 | 2.26e-21 | 1.08e+07 | 9.93e+06 | 2.24e-14 |
| 270.00 | 1.71e-21 | 1.57e+07 | 1.45e+07 | 2.47e-14 |
| 280.00 | 1.32e-21 | 2.23e+07 | 2.05e+07 | 2.70e-14 |
| 290.00 | 1.04e-21 | 3.09e+07 | 2.84e+07 | 2.95e-14 |
| 298.00 | 8.69e-22 | 3.95e+07 | 3.63e+07 | 3.16e-14 |
| 300.00 | 8.33e-22 | 4.19e+07 | 3.85e+07 | 3.21e-14 |
| 310.00 | 6.79e-22 | 5.57e+07 | 5.12e+07 | 3.48e-14 |
| 320.00 | 5.62e-22 | 7.28e+07 | 6.68e+07 | 3.75e-14 |

S= 0. 148, 0.298, 0.598, 0.898, 1.498, 2.097, 2.397, 2.997, 3.597, 4.496, at both sides of the IRC

### Reverse BTS2b

| T      | Keq      | ktst     | kt       |
|--------|----------|----------|----------|
| 220.00 | 4.23e-22 | 9.12e-02 | 3.86e-23 |
| 230.00 | 3.39e-22 | 3.02e-01 | 1.02e-22 |
| 240.00 | 2.77e-22 | 9.06e-01 | 2.51e-22 |
| 250.00 | 2.32e-22 | 2.49e+00 | 5.77e-22 |
| 260.00 | 1.97e-22 | 6.32e+00 | 1.25e-21 |

|        |          |          |          |
|--------|----------|----------|----------|
| 270.00 | 1.70e-22 | 1.50e+01 | 2.55e-21 |
| 280.00 | 1.49e-22 | 3.34e+01 | 4.97e-21 |
| 290.00 | 1.32e-22 | 7.05e+01 | 9.30e-21 |
| 298.00 | 1.21e-22 | 1.23e+02 | 1.48e-20 |
| 300.00 | 1.18e-22 | 1.41e+02 | 1.67e-20 |
| 310.00 | 1.07e-22 | 2.71e+02 | 2.90e-20 |
| 320.00 | 9.75e-23 | 5.00e+02 | 4.87e-20 |

Conventional TST only

### HTS3a

| T      | Keq      | tunn | ktst     | kcvt     | kt       |
|--------|----------|------|----------|----------|----------|
| 220.00 | 7.58e-21 | 0.71 | 2.87e+10 | 2.41e+10 | 1.29e-10 |
| 230.00 | 5.11e-21 | 0.70 | 3.45e+10 | 2.89e+10 | 1.03e-10 |
| 240.00 | 3.57e-21 | 0.69 | 4.08e+10 | 3.41e+10 | 8.36e-11 |
| 250.00 | 2.58e-21 | 0.68 | 4.76e+10 | 3.96e+10 | 6.97e-11 |
| 260.00 | 1.92e-21 | 0.68 | 5.48e+10 | 4.55e+10 | 5.90e-11 |
| 270.00 | 1.46e-21 | 0.67 | 6.24e+10 | 5.16e+10 | 5.06e-11 |
| 280.00 | 1.14e-21 | 0.67 | 7.05e+10 | 5.81e+10 | 4.42e-11 |
| 290.00 | 9.01e-22 | 0.67 | 7.88e+10 | 6.47e+10 | 3.89e-11 |
| 298.00 | 7.59e-22 | 0.67 | 8.58e+10 | 7.02e+10 | 3.55e-11 |
| 300.00 | 7.29e-22 | 0.66 | 8.75e+10 | 7.16e+10 | 3.47e-11 |
| 310.00 | 5.98e-22 | 0.66 | 9.65e+10 | 7.87e+10 | 3.12e-11 |
| 320.00 | 4.99e-22 | 0.66 | 1.06e+11 | 8.59e+10 | 2.83e-11 |

S=0.187, 0.374, 0.749, 1.121, 1.8709, 2.619, 2.992, 3.740, 4.485, 5.341, at both sides of the IRC

### HTS3b

| T      | Keq      | tunn | ktst     | kcvt     | kt       |
|--------|----------|------|----------|----------|----------|
| 220.00 | 7.58e-21 | 3.01 | 4.47e+09 | 3.42e+09 | 7.81e-11 |
| 230.00 | 5.11e-21 | 2.76 | 5.84e+09 | 4.46e+09 | 6.29e-11 |
| 240.00 | 3.57e-21 | 2.54 | 7.47e+09 | 5.70e+09 | 5.18e-11 |
| 250.00 | 2.58e-21 | 2.36 | 9.36e+09 | 7.12e+09 | 4.34e-11 |
| 260.00 | 1.92e-21 | 2.22 | 1.15e+10 | 8.75e+09 | 3.72e-11 |
| 270.00 | 1.46e-21 | 2.08 | 1.40e+10 | 1.06e+10 | 3.22e-11 |
| 280.00 | 1.14e-21 | 1.98 | 1.67e+10 | 1.26e+10 | 2.83e-11 |
| 290.00 | 9.01e-22 | 1.89 | 1.97e+10 | 1.48e+10 | 2.51e-11 |
| 298.00 | 7.59e-22 | 1.81 | 2.23e+10 | 1.67e+10 | 2.30e-11 |
| 300.00 | 7.29e-22 | 1.80 | 2.30e+10 | 1.72e+10 | 2.26e-11 |
| 310.00 | 5.98e-22 | 1.72 | 2.65e+10 | 1.99e+10 | 2.05e-11 |
| 320.00 | 4.99e-22 | 1.65 | 3.03e+10 | 2.27e+10 | 1.87e-11 |

S=0.187, 0.374, 0.749, 1.121, 1.8709, 2.619, 2.992, 3.740, 4.485, 5.341, at both sides of the IRC

### HTS5a

| T      | Keq      | tunn | ktst     | kcvt     | kt       |
|--------|----------|------|----------|----------|----------|
| 220.00 | 5.92e-18 | 0.52 | 5.35e+06 | 3.93e+06 | 1.21e-11 |
| 230.00 | 2.56e-18 | 0.53 | 9.69e+06 | 7.15e+06 | 9.64e-12 |
| 240.00 | 1.19e-18 | 0.53 | 1.67e+07 | 1.24e+07 | 7.86e-12 |
| 250.00 | 5.89e-19 | 0.54 | 2.76e+07 | 2.05e+07 | 6.54e-12 |



|        |          |      |          |          |          |
|--------|----------|------|----------|----------|----------|
| 260.00 | 3.09e-19 | 0.55 | 4.39e+07 | 3.27e+07 | 5.53e-12 |
| 270.00 | 1.70e-19 | 0.55 | 6.74e+07 | 5.05e+07 | 4.75e-12 |
| 280.00 | 9.82e-20 | 0.56 | 1.01e+08 | 7.54e+07 | 4.15e-12 |
| 290.00 | 5.90e-20 | 0.57 | 1.46e+08 | 1.10e+08 | 3.67e-12 |
| 298.00 | 4.03e-20 | 0.57 | 1.93e+08 | 1.46e+08 | 3.34e-12 |
| 300.00 | 3.67e-20 | 0.57 | 2.07e+08 | 1.56e+08 | 3.27e-12 |
| 310.00 | 2.36e-20 | 0.58 | 2.86e+08 | 2.16e+08 | 2.95e-12 |
| 320.00 | 1.56e-20 | 0.59 | 3.89e+08 | 2.94e+08 | 2.69e-12 |

S=0.160, 0.319, 0.639, 0.958, 1.596, 2.235, 3.193, 3.832, 4.566, -0.160, -0.319, -0.639, -0.958, -1.596, -2.235, -3.193

#### HTS6a

| T      | Keq      | tunn  | ktst     | kcvt     | kt       |
|--------|----------|-------|----------|----------|----------|
| 220.00 | 5.92e-18 | 11.31 | 4.37e+03 | 2.89e+03 | 1.93e-13 |
| 230.00 | 2.56e-18 | 9.19  | 1.13e+04 | 7.57e+03 | 1.78e-13 |
| 240.00 | 1.19e-18 | 7.66  | 2.72e+04 | 1.84e+04 | 1.68e-13 |
| 250.00 | 5.89e-19 | 6.55  | 6.08e+04 | 4.15e+04 | 1.60e-13 |
| 260.00 | 3.09e-19 | 5.70  | 1.28e+05 | 8.82e+04 | 1.55e-13 |
| 270.00 | 1.70e-19 | 5.03  | 2.56e+05 | 1.78e+05 | 1.52e-13 |
| 280.00 | 9.82e-20 | 4.52  | 4.88e+05 | 3.41e+05 | 1.51e-13 |
| 290.00 | 5.90e-20 | 4.10  | 8.89e+05 | 6.25e+05 | 1.51e-13 |
| 298.00 | 4.03e-20 | 3.81  | 1.40e+06 | 9.87e+05 | 1.51e-13 |
| 300.00 | 3.67e-20 | 3.75  | 1.56e+06 | 1.10e+06 | 1.52e-13 |
| 310.00 | 2.36e-20 | 3.45  | 2.64e+06 | 1.88e+06 | 1.53e-13 |
| 320.00 | 1.56e-20 | 3.22  | 4.33e+06 | 3.09e+06 | 1.56e-13 |

S=0.153, 0.306, 0.610, 0.915, 1.525, 2.136, 2.441, 3.051, 3.661, 4.362, at both sides of the IRC

#### HTS8a

| T      | Keq      | tunn      | ktst     | kcvt     | kt       |
|--------|----------|-----------|----------|----------|----------|
| 220.00 | 1.53e-19 | 260734.46 | 7.19e-01 | 3.54e-01 | 1.41e-14 |
| 230.00 | 9.08e-20 | 115833.33 | 2.42e+00 | 1.20e+00 | 1.26e-14 |
| 240.00 | 5.65e-20 | 55585.83  | 7.34e+00 | 3.67e+00 | 1.15e-14 |
| 250.00 | 3.66e-20 | 28543.69  | 2.04e+01 | 1.03e+01 | 1.08e-14 |
| 260.00 | 2.46e-20 | 15639.10  | 5.25e+01 | 2.66e+01 | 1.02e-14 |
| 270.00 | 1.71e-20 | 8987.54   | 1.26e+02 | 6.42e+01 | 9.85e-15 |
| 280.00 | 1.22e-20 | 5434.48   | 2.83e+02 | 1.45e+02 | 9.61e-15 |
| 290.00 | 8.94e-21 | 3408.36   | 6.04e+02 | 3.11e+02 | 9.48e-15 |
| 298.00 | 7.09e-21 | 2409.42   | 1.07e+03 | 5.52e+02 | 9.43e-15 |
| 300.00 | 6.71e-21 | 2208.20   | 1.22e+03 | 6.34e+02 | 9.39e-15 |
| 310.00 | 5.13e-21 | 1487.80   | 2.37e+03 | 1.23e+03 | 9.40e-15 |
| 320.00 | 4.01e-21 | 1026.09   | 4.41e+03 | 2.30e+03 | 9.45e-15 |

S= 0.155, 0.310, 0.620, 0.930, 1.550, 2.170, 2.480, 3.100, 3.720, 4.216 , at both sides of the IRC

#### HTS8b

| T      | Keq      | tunn      | ktst     | kcvt     | kt       |
|--------|----------|-----------|----------|----------|----------|
| 220.00 | 1.53e-19 | 301587.30 | 1.37e+00 | 6.93e-01 | 3.20e-14 |
| 230.00 | 9.08e-20 | 132894.74 | 4.48e+00 | 2.28e+00 | 2.75e-14 |

|        |          |          |          |          |          |
|--------|----------|----------|----------|----------|----------|
| 240.00 | 5.65e-20 | 63475.70 | 1.32e+01 | 6.79e+00 | 2.43e-14 |
| 250.00 | 3.66e-20 | 32540.54 | 3.59e+01 | 1.85e+01 | 2.20e-14 |
| 260.00 | 2.46e-20 | 17633.26 | 9.01e+01 | 4.69e+01 | 2.03e-14 |
| 270.00 | 1.71e-20 | 10090.09 | 2.11e+02 | 1.11e+02 | 1.91e-14 |
| 280.00 | 1.22e-20 | 6056.91  | 4.67e+02 | 2.46e+02 | 1.82e-14 |
| 290.00 | 8.94e-21 | 3779.07  | 9.77e+02 | 5.16e+02 | 1.74e-14 |
| 298.00 | 7.09e-21 | 2671.84  | 1.70e+03 | 9.02e+02 | 1.71e-14 |
| 300.00 | 6.71e-21 | 2456.31  | 1.95e+03 | 1.03e+03 | 1.70e-14 |
| 310.00 | 5.13e-21 | 1636.36  | 3.71e+03 | 1.98e+03 | 1.66e-14 |
| 320.00 | 4.01e-21 | 1129.48  | 6.79e+03 | 3.63e+03 | 1.64e-14 |

S= 0.155, 0.310, 0.620, 0.930, 1.550, 2.170, 2.480, 3.100, 3.720, 4.216 , at both sides of the IRC

### Reactions starting by HSSNO<sub>2</sub> + OH

#### BTS1a

| T      | Keq      | ktst     | kcvt     | kt       |
|--------|----------|----------|----------|----------|
| 220.00 | 7.02e-21 | 1.32e+09 | 1.05e+09 | 7.37e-12 |
| 230.00 | 4.83e-21 | 1.70e+09 | 1.35e+09 | 6.52e-12 |
| 240.00 | 3.44e-21 | 2.13e+09 | 1.69e+09 | 5.81e-12 |
| 250.00 | 2.52e-21 | 2.61e+09 | 2.07e+09 | 5.22e-12 |
| 260.00 | 1.90e-21 | 3.16e+09 | 2.51e+09 | 4.77e-12 |
| 270.00 | 1.47e-21 | 3.77e+09 | 2.98e+09 | 4.37e-12 |
| 280.00 | 1.15e-21 | 4.43e+09 | 3.50e+09 | 4.04e-12 |
| 290.00 | 9.27e-22 | 5.15e+09 | 4.07e+09 | 3.77e-12 |
| 298.00 | 7.88e-22 | 5.77e+09 | 4.55e+09 | 3.58e-12 |
| 300.00 | 7.58e-22 | 5.92e+09 | 4.67e+09 | 3.54e-12 |
| 310.00 | 6.28e-22 | 6.75e+09 | 5.31e+09 | 3.34e-12 |
| 320.00 | 5.28e-22 | 7.62e+09 | 5.99e+09 | 3.17e-12 |

S= 0.149, 0.299, 0.599, 0.899, 1.499, 2.098, 2.398, 2.998, 3.597, 4.489, at both sides of the IRC

#### Reverse BTS1a

| T      | Keq      | ktst     | kt       |
|--------|----------|----------|----------|
| 220.00 | 4.39e-19 | 7.91e+02 | 3.47e-16 |
| 230.00 | 1.87e-19 | 2.10e+03 | 3.94e-16 |
| 240.00 | 8.63e-20 | 5.16e+03 | 4.45e-16 |
| 250.00 | 4.24e-20 | 1.18e+04 | 5.00e-16 |
| 260.00 | 2.21e-20 | 2.54e+04 | 5.60e-16 |
| 270.00 | 1.21e-20 | 5.17e+04 | 6.25e-16 |
| 280.00 | 6.93e-21 | 1.00e+05 | 6.93e-16 |
| 290.00 | 4.14e-21 | 1.86e+05 | 7.70e-16 |
| 298.00 | 2.81e-21 | 2.96e+05 | 8.33e-16 |
| 300.00 | 2.56e-21 | 3.31e+05 | 8.49e-16 |
| 310.00 | 1.64e-21 | 5.69e+05 | 9.35e-16 |
| 320.00 | 1.08e-21 | 9.46e+05 | 1.03e-15 |

Conventional TST only

**BTS1b**

| T      | Keq      | ktst     | kcvt     | kt       |
|--------|----------|----------|----------|----------|
| 220.00 | 4.31e-22 | 1.02e+09 | 8.72e+08 | 3.75e-13 |
| 230.00 | 3.75e-22 | 1.19e+09 | 1.02e+09 | 3.83e-13 |
| 240.00 | 3.32e-22 | 1.37e+09 | 1.18e+09 | 3.92e-13 |
| 250.00 | 2.98e-22 | 1.55e+09 | 1.34e+09 | 3.99e-13 |
| 260.00 | 2.70e-22 | 1.74e+09 | 1.50e+09 | 4.06e-13 |
| 270.00 | 2.48e-22 | 1.93e+09 | 1.67e+09 | 4.14e-13 |
| 280.00 | 2.30e-22 | 2.13e+09 | 1.85e+09 | 4.25e-13 |
| 290.00 | 2.15e-22 | 2.33e+09 | 2.02e+09 | 4.34e-13 |
| 298.00 | 2.04e-22 | 2.49e+09 | 2.16e+09 | 4.41e-13 |
| 300.00 | 2.02e-22 | 2.53e+09 | 2.20e+09 | 4.44e-13 |
| 310.00 | 1.91e-22 | 2.73e+09 | 2.38e+09 | 4.55e-13 |
| 320.00 | 1.82e-22 | 2.94e+09 | 2.55e+09 | 4.64e-13 |

S= 0.149, 0.299, 0.599, 0.899, 1.499, 2.098, 2.398, 2.998, 3.597, 4.496, at both sides of the IRC

**Reverse BTS1b**

| T      | Keq      | ktst     | kt       |
|--------|----------|----------|----------|
| 220.00 | 2.59e-22 | 6.48e+04 | 1.68e-17 |
| 230.00 | 1.56e-22 | 1.41e+05 | 2.19e-17 |
| 240.00 | 9.79e-23 | 2.89e+05 | 2.83e-17 |
| 250.00 | 6.41e-23 | 5.59e+05 | 3.59e-17 |
| 260.00 | 4.36e-23 | 1.03e+06 | 4.49e-17 |
| 270.00 | 3.06e-23 | 1.81e+06 | 5.54e-17 |
| 280.00 | 2.21e-23 | 3.07e+06 | 6.78e-17 |
| 290.00 | 1.64e-23 | 5.01e+06 | 8.21e-17 |
| 298.00 | 1.31e-23 | 7.25e+06 | 9.50e-17 |
| 300.00 | 1.24e-23 | 7.93e+06 | 9.85e-17 |
| 310.00 | 9.61e-24 | 1.22e+07 | 1.17e-16 |
| 320.00 | 7.58e-24 | 1.82e+07 | 1.38e-16 |

Conventional TST only

**BTS2a**

| T      | Keq      | ktst     | kcvt     | kt       |
|--------|----------|----------|----------|----------|
| 220.00 | 4.96e-23 | 9.20e+07 | 9.20e+07 | 4.57e-15 |
| 230.00 | 4.37e-23 | 1.31e+08 | 1.31e+08 | 5.73e-15 |
| 240.00 | 3.90e-23 | 1.81e+08 | 1.81e+08 | 7.06e-15 |
| 250.00 | 3.53e-23 | 2.44e+08 | 2.44e+08 | 8.61e-15 |
| 260.00 | 3.22e-23 | 3.21e+08 | 3.21e+08 | 1.03e-14 |
| 270.00 | 2.97e-23 | 4.14e+08 | 4.14e+08 | 1.23e-14 |
| 280.00 | 2.76e-23 | 5.25e+08 | 5.25e+08 | 1.45e-14 |
| 290.00 | 2.59e-23 | 6.54e+08 | 6.54e+08 | 1.69e-14 |
| 298.00 | 2.47e-23 | 7.71e+08 | 7.71e+08 | 1.90e-14 |
| 300.00 | 2.44e-23 | 8.03e+08 | 8.03e+08 | 1.96e-14 |
| 310.00 | 2.31e-23 | 9.73e+08 | 9.73e+08 | 2.25e-14 |
| 320.00 | 2.21e-23 | 1.16e+09 | 1.16e+09 | 2.56e-14 |

S= 0.149, 0.299, 0.599, 0.899, 1.499, 2.098, 2.398, 2.998, 3.597, 4.496, at both sides of the IRC

**Reverse BTS2a**

| T      | Keq      | ktst     | kt       |
|--------|----------|----------|----------|
| 220.00 | 1.22e-23 | 1.40e-02 | 1.71e-25 |
| 230.00 | 1.19e-23 | 4.95e-02 | 5.90e-25 |
| 240.00 | 1.17e-23 | 1.58e-01 | 1.85e-24 |
| 250.00 | 1.15e-23 | 4.58e-01 | 5.27e-24 |
| 260.00 | 1.14e-23 | 1.23e+00 | 1.40e-23 |
| 270.00 | 1.13e-23 | 3.05e+00 | 3.45e-23 |
| 280.00 | 1.13e-23 | 7.12e+00 | 8.04e-23 |
| 290.00 | 1.13e-23 | 1.57e+01 | 1.77e-22 |
| 298.00 | 1.13e-23 | 2.84e+01 | 3.22e-22 |
| 300.00 | 1.13e-23 | 3.27e+01 | 3.71e-22 |
| 310.00 | 1.14e-23 | 6.52e+01 | 7.43e-22 |
| 320.00 | 1.15e-23 | 1.24e+02 | 1.42e-21 |

Conventional TST only

**BTS2b**

| T      | Keq      | ktst     | kcvt     | kt       |
|--------|----------|----------|----------|----------|
| 220.00 | 4.70e-23 | 8.31e+08 | 7.80e+08 | 3.67e-14 |
| 230.00 | 4.14e-23 | 1.06e+09 | 9.90e+08 | 4.10e-14 |
| 240.00 | 3.70e-23 | 1.32e+09 | 1.23e+09 | 4.55e-14 |
| 250.00 | 3.35e-23 | 1.61e+09 | 1.50e+09 | 5.03e-14 |
| 260.00 | 3.06e-23 | 1.93e+09 | 1.80e+09 | 5.52e-14 |
| 270.00 | 2.83e-23 | 2.29e+09 | 2.14e+09 | 6.06e-14 |
| 280.00 | 2.64e-23 | 2.68e+09 | 2.50e+09 | 6.59e-14 |
| 290.00 | 2.48e-23 | 3.10e+09 | 2.89e+09 | 7.16e-14 |
| 298.00 | 2.37e-23 | 3.46e+09 | 3.22e+09 | 7.62e-14 |
| 300.00 | 2.34e-23 | 3.56e+09 | 3.30e+09 | 7.72e-14 |
| 310.00 | 2.22e-23 | 4.04e+09 | 3.75e+09 | 8.34e-14 |
| 320.00 | 2.13e-23 | 4.54e+09 | 4.21e+09 | 8.95e-14 |

S= 0.149, 0.299, 0.599, 0.899, 1.499, 2.098, 2.398, 2.998, 3.597, 4.496, at both sides of the IRC

**Reverse BTS2b**

| T      | Keq      | k2       | kt       |
|--------|----------|----------|----------|
| 220.00 | 1.22e-23 | 8.08e-02 | 9.89e-25 |
| 230.00 | 1.19e-23 | 2.58e-01 | 3.07e-24 |
| 240.00 | 1.17e-23 | 7.47e-01 | 8.72e-24 |
| 250.00 | 1.15e-23 | 1.99e+00 | 2.29e-23 |
| 260.00 | 1.14e-23 | 4.91e+00 | 5.59e-23 |
| 270.00 | 1.13e-23 | 1.13e+01 | 1.28e-22 |
| 280.00 | 1.13e-23 | 2.47e+01 | 2.79e-22 |
| 290.00 | 1.13e-23 | 5.09e+01 | 5.75e-22 |
| 298.00 | 1.13e-23 | 8.76e+01 | 9.92e-22 |
| 300.00 | 1.13e-23 | 9.99e+01 | 1.13e-21 |
| 310.00 | 1.14e-23 | 1.88e+02 | 2.14e-21 |
| 320.00 | 1.15e-23 | 3.40e+02 | 3.90e-21 |

Conventional TST only

**HTS3a**

| T      | Keq      | tunn | ktst     | kcvt     | kt       |
|--------|----------|------|----------|----------|----------|
| 220.00 | 7.02e-21 | 0.27 | 7.97e+11 | 3.18e+11 | 5.95e-10 |
| 230.00 | 4.83e-21 | 0.26 | 8.08e+11 | 3.25e+11 | 4.10e-10 |
| 240.00 | 3.44e-21 | 0.26 | 8.19e+11 | 3.32e+11 | 2.92e-10 |
| 250.00 | 2.52e-21 | 0.25 | 8.28e+11 | 3.38e+11 | 2.14e-10 |
| 260.00 | 1.90e-21 | 0.25 | 8.36e+11 | 3.44e+11 | 1.62e-10 |
| 270.00 | 1.47e-21 | 0.24 | 8.44e+11 | 3.49e+11 | 1.25e-10 |
| 280.00 | 1.15e-21 | 0.24 | 8.50e+11 | 3.53e+11 | 9.84e-11 |
| 290.00 | 9.27e-22 | 0.24 | 8.56e+11 | 3.57e+11 | 7.89e-11 |
| 298.00 | 7.88e-22 | 0.24 | 8.61e+11 | 3.60e+11 | 6.70e-11 |
| 300.00 | 7.58e-22 | 0.24 | 8.62e+11 | 3.60e+11 | 6.45e-11 |
| 310.00 | 6.28e-22 | 0.23 | 8.66e+11 | 3.63e+11 | 5.35e-11 |
| 320.00 | 5.28e-22 | 0.23 | 8.71e+11 | 3.66e+11 | 4.49e-11 |

S=0.164, 0.329, 0.657, 0.985, 1.642, 2.300, 2.628, 3.284, 3.941, 4.925, at both sides of the IRC

**HTS3b**

| T      | Keq      | tunn | ktst     | kcvt     | kt       |
|--------|----------|------|----------|----------|----------|
| 220.00 | 7.02e-21 | 1.44 | 9.49e+09 | 6.59e+09 | 6.68e-11 |
| 230.00 | 4.83e-21 | 1.39 | 1.19e+10 | 8.65e+09 | 5.79e-11 |
| 240.00 | 3.44e-21 | 1.34 | 1.47e+10 | 1.11e+10 | 5.12e-11 |
| 250.00 | 2.52e-21 | 1.30 | 1.78e+10 | 1.40e+10 | 4.59e-11 |
| 260.00 | 1.90e-21 | 1.27 | 2.12e+10 | 1.73e+10 | 4.16e-11 |
| 270.00 | 1.47e-21 | 0.59 | 2.50e+10 | 2.04e+10 | 1.77e-11 |
| 280.00 | 1.15e-21 | 0.59 | 2.91e+10 | 2.37e+10 | 1.63e-11 |
| 290.00 | 9.27e-22 | 0.60 | 3.35e+10 | 2.72e+10 | 1.50e-11 |
| 298.00 | 7.88e-22 | 0.60 | 3.73e+10 | 3.01e+10 | 1.42e-11 |
| 300.00 | 7.58e-22 | 0.60 | 3.82e+10 | 3.09e+10 | 1.39e-11 |
| 310.00 | 6.28e-22 | 0.60 | 4.32e+10 | 3.48e+10 | 1.31e-11 |
| 320.00 | 5.28e-22 | 0.60 | 4.85e+10 | 3.89e+10 | 1.23e-11 |

S=0.214, 0.428, 0.956, 1.283, 2.141, 2.997, 3.425, 4.279, 5.129, 6.451, -0.214, -0.428, -0.956, -1.283, -2.141, -2.997, -3.425, -4.282, -5.136, -5.734

**FTS10a**

| T      | Keq      | ktst     | kcvt     | kt       |
|--------|----------|----------|----------|----------|
| 220.00 | 4.16e-23 | 4.50e+09 | 4.43e+09 | 1.84e-13 |
| 230.00 | 3.67e-23 | 5.37e+09 | 5.29e+09 | 1.94e-13 |
| 240.00 | 3.28e-23 | 6.31e+09 | 6.21e+09 | 2.04e-13 |
| 250.00 | 2.97e-23 | 7.30e+09 | 7.20e+09 | 2.14e-13 |
| 260.00 | 2.72e-23 | 8.36e+09 | 8.24e+09 | 2.24e-13 |
| 270.00 | 2.51e-23 | 9.47e+09 | 9.33e+09 | 2.34e-13 |
| 280.00 | 2.34e-23 | 1.06e+10 | 1.05e+10 | 2.46e-13 |
| 290.00 | 2.20e-23 | 1.18e+10 | 1.16e+10 | 2.55e-13 |
| 298.00 | 2.10e-23 | 1.28e+10 | 1.26e+10 | 2.64e-13 |
| 300.00 | 2.08e-23 | 1.30e+10 | 1.28e+10 | 2.66e-13 |
| 310.00 | 1.97e-23 | 1.43e+10 | 1.41e+10 | 2.78e-13 |

|        |          |          |          |          |
|--------|----------|----------|----------|----------|
| 320.00 | 1.89e-23 | 1.56e+10 | 1.53e+10 | 2.89e-13 |
|--------|----------|----------|----------|----------|

S=0.148, 0.299, v0.599, 0.899, 1.499, 2.099, 2.399, 2.999, 3.599, 4.499, at both sides of the IRC

### FTS10b

| T      | Keq      | ktst     | kcvt     | kt       |
|--------|----------|----------|----------|----------|
| 220.00 | 6.01e-21 | 8.55e+06 | 7.98e+06 | 4.79e-14 |
| 230.00 | 4.57e-21 | 1.24e+07 | 1.16e+07 | 5.30e-14 |
| 240.00 | 3.57e-21 | 1.75e+07 | 1.63e+07 | 5.83e-14 |
| 250.00 | 2.86e-21 | 2.40e+07 | 2.23e+07 | 6.38e-14 |
| 260.00 | 2.33e-21 | 3.20e+07 | 2.97e+07 | 6.93e-14 |
| 270.00 | 1.94e-21 | 4.17e+07 | 3.87e+07 | 7.51e-14 |
| 280.00 | 1.64e-21 | 5.34e+07 | 4.95e+07 | 8.12e-14 |
| 290.00 | 1.41e-21 | 6.71e+07 | 6.22e+07 | 8.74e-14 |
| 298.00 | 1.25e-21 | 7.97e+07 | 7.37e+07 | 9.24e-14 |
| 300.00 | 1.22e-21 | 8.31e+07 | 7.68e+07 | 9.37e-14 |
| 310.00 | 1.07e-21 | 1.01e+08 | 9.35e+07 | 1.00e-13 |
| 320.00 | 9.51e-22 | 1.22e+08 | 1.12e+08 | 1.07e-13 |

S= S=0.148, 0.299, v0.599, 0.899, 1.499, 2.099, 2.399, 2.999, 3.599, 4.499, at both sides of the IRC

### HTS5a

| T      | Keq      | tunn    | ktst     | kcvt     | kt       |
|--------|----------|---------|----------|----------|----------|
| 220.00 | 7.08e-22 | 5755.29 | 6.62e+04 | 6.62e+04 | 2.70e-13 |
| 230.00 | 5.05e-22 | 3206.61 | 1.21e+05 | 1.21e+05 | 1.96e-13 |
| 240.00 | 3.73e-22 | 1885.71 | 2.10e+05 | 2.10e+05 | 1.48e-13 |
| 250.00 | 2.83e-22 | 1163.32 | 3.49e+05 | 3.49e+05 | 1.15e-13 |
| 260.00 | 2.20e-22 | 746.86  | 5.58e+05 | 5.57e+05 | 9.16e-14 |
| 270.00 | 1.75e-22 | 497.09  | 8.60e+05 | 8.59e+05 | 7.49e-14 |
| 280.00 | 1.42e-22 | 343.75  | 1.29e+06 | 1.28e+06 | 6.26e-14 |
| 290.00 | 1.18e-22 | 242.78  | 1.87e+06 | 1.87e+06 | 5.34e-14 |
| 298.00 | 1.02e-22 | 188.66  | 2.48e+06 | 2.47e+06 | 4.76e-14 |
| 300.00 | 9.88e-23 | 176.98  | 2.65e+06 | 2.65e+06 | 4.63e-14 |
| 310.00 | 8.41e-23 | 132.15  | 3.67e+06 | 3.67e+06 | 4.08e-14 |
| 320.00 | 7.26e-23 | 101.00  | 4.99e+06 | 4.98e+06 | 3.65e-14 |

S= 0.269, 0.539, 1.078, 1.616, 2.6896, 3.776, 4.315, 5.394, 6.470, 7.224 at both sides of the IRC

### HTS6a

| T      | Keq      | tunn | ktst     | kcvt     | kt       |
|--------|----------|------|----------|----------|----------|
| 220.00 | 2.07e-21 | 1.22 | 9.22e+05 | 7.46e+05 | 1.89e-15 |
| 230.00 | 1.19e-21 | 1.14 | 1.86e+06 | 1.51e+06 | 2.04e-15 |
| 240.00 | 7.15e-22 | 1.09 | 3.54e+06 | 2.87e+06 | 2.23e-15 |
| 250.00 | 4.50e-22 | 1.04 | 6.41e+06 | 5.20e+06 | 2.44e-15 |
| 260.00 | 2.95e-22 | 1.00 | 1.11e+07 | 9.02e+06 | 2.66e-15 |
| 270.00 | 2.00e-22 | 0.97 | 1.85e+07 | 1.50e+07 | 2.92e-15 |
| 280.00 | 1.40e-22 | 0.95 | 2.96e+07 | 2.41e+07 | 3.19e-15 |
| 290.00 | 1.01e-22 | 0.93 | 4.61e+07 | 3.75e+07 | 3.49e-15 |
| 298.00 | 7.86e-23 | 0.91 | 6.43e+07 | 5.22e+07 | 3.74e-15 |

|        |          |      |          |          |          |
|--------|----------|------|----------|----------|----------|
| 300.00 | 7.41e-23 | 0.91 | 6.96e+07 | 5.66e+07 | 3.81e-15 |
| 310.00 | 5.59e-23 | 0.89 | 1.02e+08 | 8.33e+07 | 4.16e-15 |
| 320.00 | 4.30e-23 | 0.88 | 1.47e+08 | 1.20e+08 | 4.55e-15 |

S=0.153, 0.307, 0.613, 0.920, 1.288, -0.153, -0.306, -0.614, -0.920, -1.533, -2.145, -2.452, -3.065, -3.678, -4.107

#### HTS8a

| T      | Keq      | tunn      | ktst     | kcvt     | kt       |
|--------|----------|-----------|----------|----------|----------|
| 220.00 | 5.16e-19 | 781501.34 | 1.93e+01 | 7.46e+00 | 3.01e-12 |
| 230.00 | 2.92e-19 | 332300.88 | 5.77e+01 | 2.26e+01 | 2.19e-12 |
| 240.00 | 1.73e-19 | 153035.14 | 1.57e+02 | 6.26e+01 | 1.66e-12 |
| 250.00 | 1.08e-19 | 75625.00  | 3.96e+02 | 1.60e+02 | 1.31e-12 |
| 260.00 | 6.98e-20 | 39841.69  | 9.29e+02 | 3.79e+02 | 1.05e-12 |
| 270.00 | 4.67e-20 | 22301.30  | 2.05e+03 | 8.43e+02 | 8.79e-13 |
| 280.00 | 3.23e-20 | 12994.35  | 4.26e+03 | 1.77e+03 | 7.43e-13 |
| 290.00 | 2.30e-20 | 7909.60   | 8.44e+03 | 3.54e+03 | 6.43e-13 |
| 298.00 | 1.78e-20 | 5469.80   | 1.41e+04 | 5.96e+03 | 5.80e-13 |
| 300.00 | 1.67e-20 | 5000.00   | 1.60e+04 | 6.76e+03 | 5.66e-13 |
| 310.00 | 1.25e-20 | 3274.19   | 2.90e+04 | 1.24e+04 | 5.07e-13 |
| 320.00 | 9.49e-21 | 2211.01   | 5.08e+04 | 2.18e+04 | 4.58e-13 |

S= 0.1545, 0.309, 0.618, 0.928, 1.547, 2.167, 2.475, 3.095, 3.713, 4.147, at both sides of the IRC

#### HTS8b

| T      | Keq      | tunn      | ktst     | kcvt     | kt       |
|--------|----------|-----------|----------|----------|----------|
| 220.00 | 5.16e-19 | 871212.12 | 5.51e+01 | 2.64e+01 | 1.19e-11 |
| 230.00 | 2.92e-19 | 368906.46 | 1.56e+02 | 7.59e+01 | 8.17e-12 |
| 240.00 | 1.73e-19 | 170351.76 | 4.05e+02 | 1.99e+02 | 5.88e-12 |
| 250.00 | 1.08e-19 | 84123.71  | 9.76e+02 | 4.85e+02 | 4.40e-12 |
| 260.00 | 6.98e-20 | 44272.73  | 2.20e+03 | 1.10e+03 | 3.40e-12 |
| 270.00 | 4.67e-20 | 24491.53  | 4.66e+03 | 2.36e+03 | 2.70e-12 |
| 280.00 | 3.23e-20 | 14246.86  | 9.36e+03 | 4.78e+03 | 2.20e-12 |
| 290.00 | 2.30e-20 | 8645.72   | 1.79e+04 | 9.23e+03 | 1.83e-12 |
| 298.00 | 1.78e-20 | 5980.13   | 2.92e+04 | 1.51e+04 | 1.61e-12 |
| 300.00 | 1.67e-20 | 5438.60   | 3.29e+04 | 1.71e+04 | 1.56e-12 |
| 310.00 | 1.25e-20 | 3564.36   | 5.81e+04 | 3.03e+04 | 1.35e-12 |
| 320.00 | 9.49e-21 | 2384.62   | 9.91e+04 | 5.20e+04 | 1.18e-12 |

S= 0.1545, 0.309, 0.618, 0.928, 1.547, 2.167, 2.475, 3.095, 3.713, 4.147, at both sides of the IRC

**Table S7.** RMS and MAE of the difference in the relative energies computed at CCSD(T)/aug-cc-pV(T+d)Z level of theory over optimized geometries obtained at BH&HLYP/6-311+G(2df,2p) and QCISD/6-311+G(2df,2p) levels of theory.

| Reaction                      | RMS  | MAE   |
|-------------------------------|------|-------|
| <b>HSSH + OH</b>              | 0.39 | -1.34 |
| <b>HSSCH<sub>3</sub> + OH</b> | 0.56 | -1.27 |
| <b>HSSNH<sub>2</sub> + OH</b> | 0.55 | 1.44  |

|                               |      |       |
|-------------------------------|------|-------|
| <b>HSSCOOH + OH</b>           | 0.36 | -1.18 |
| <b>HSSCN + OH</b>             | 0.37 | -1.09 |
| <b>HSSNO<sup>2</sup> + OH</b> | 0.62 | -1.58 |

**Table S8.** Cartesian coordinates (in Angstrom) of all stationary points investigated.

### Reactions starting by HSSH + OH

BH&HLYP/6-311+G(2df,2p) optimized geometries

HSSH

```
H -0.060670 -0.054583 -0.007322
S 0.026007 0.048606 1.319357
S 2.079107 0.004448 1.494867
H 2.311543 1.315414 1.419415
```

OH

```
8 0.000000 0.000000 0.004208
1 0.000000 0.000000 0.965792
```

CRFTS1a = CRBTS1b = CRPTS3a = CRHTS3a

```
H -0.926892 1.249114 0.003981
S -1.368739 -0.009588 0.005474
S 0.476466 -0.919605 -0.067204
H 0.750405 -0.941530 1.237400
O 1.538535 1.576696 0.125888
H 2.082202 1.409436 -0.64682
```

FTS1a

```
H -1.106328 1.350168 0.282399
S -1.378202 0.077931 -0.002865
S 0.678379 -0.696456 -0.071295
H 1.026832 -0.895238 1.203289
O 1.165050 1.041624 0.037389
H 2.034550 1.067216 -0.355787
```

CPFTS1a = CPFTS1b

```
H -1.262804 1.268774 0.215461
S -1.985646 0.148778 0.255842
S 1.068090 -0.691113 -0.127757
H 1.117592 -1.015736 1.167914
O 1.401710 0.916004 0.009179
H 2.338397 1.050928 -0.090079
```

CRFTS1b = CRBTS1a = CRHTS3b

```
H 2.168206 -0.957701 0.082441
S 1.367456 0.101991 -0.040800
S -0.424510 -0.912216 -0.109436
H -0.750755 -0.834047 1.180385
O -1.712967 1.524546 0.199409
H -1.994592 1.434971 -0.713741
```

FTS1b

```
H 1.949930 -0.914608 -0.043751
S 1.295660 0.245670 0.008978
S -0.640732 -0.720682 -0.075202
H -1.044116 -0.917443 1.184632
O -1.202826 1.011629 0.080388
H -1.940310 1.078178 -0.521150
```

BTS1a

```
S -0.092883 0.100499 0.026367
S -0.246953 0.411448 2.103269
```



|   |           |           |           |
|---|-----------|-----------|-----------|
| H | 1.210742  | -0.138156 | 0.017332  |
| H | -1.056935 | -0.621450 | 2.335787  |
| O | 0.368053  | 1.032927  | -1.817421 |
| H | -0.439897 | 1.503084  | -2.019613 |

#### CPBTS1a

|   |           |          |           |
|---|-----------|----------|-----------|
| S | -0.033423 | 0.187129 | -0.136883 |
| S | -0.246916 | 0.354574 | 2.193830  |
| H | 1.268043  | 0.155070 | 0.099034  |
| H | -1.565334 | 0.183299 | 2.127708  |
| O | 0.282920  | 0.942806 | -1.639678 |
| H | -0.537102 | 0.994277 | -2.122318 |

#### BTS1b

|   |           |           |           |
|---|-----------|-----------|-----------|
| S | -0.327946 | 0.132710  | 0.064892  |
| S | -0.003384 | 0.017947  | 2.129177  |
| H | 1.299501  | -0.229078 | 2.088616  |
| O | 0.121610  | -1.301638 | 3.812281  |
| H | -0.801812 | -1.414838 | 4.035092  |
| H | -0.277831 | -1.172570 | -0.203723 |

#### CPBTS1b

|   |           |           |           |
|---|-----------|-----------|-----------|
| S | -0.363275 | 0.158831  | -0.025959 |
| S | 0.001165  | -0.134340 | 2.289745  |
| H | 1.269929  | -0.392199 | 2.018808  |
| O | 0.089899  | -1.149015 | 3.659959  |
| H | -0.676126 | -0.977426 | 4.200323  |
| H | 0.274032  | -0.944896 | -0.413388 |

#### PTS3a

|   |           |           |           |
|---|-----------|-----------|-----------|
| H | 0.473739  | 0.091043  | -0.103333 |
| S | -0.012130 | -0.065171 | 1.288229  |
| S | 1.993410  | -0.033427 | 1.623541  |
| H | 2.314455  | -1.297166 | 1.332912  |
| O | 1.662319  | 0.138897  | -0.842802 |
| H | 1.897692  | 1.027099  | -1.109905 |

#### HTS3b

|   |           |           |           |
|---|-----------|-----------|-----------|
| H | -0.215484 | -0.206801 | -0.050182 |
| S | 0.118138  | 0.034895  | 1.272761  |
| S | 2.155325  | -0.008018 | 1.120577  |
| H | 2.340891  | -1.326663 | 1.207978  |
| O | -0.634675 | 0.066143  | -1.502124 |
| H | -0.444447 | 1.003563  | -1.588196 |

#### CPPTS3a = CPHTS3b

|   |           |           |           |
|---|-----------|-----------|-----------|
| H | -1.450057 | 0.114338  | -1.345892 |
| S | -0.519632 | 0.008742  | 1.160903  |
| S | 1.213607  | -0.307622 | 0.277157  |
| H | 0.840794  | -0.229979 | -1.009449 |
| O | -1.027678 | 0.000598  | -2.193008 |
| H | -1.421702 | 0.636238  | -2.777386 |

#### HTS3a

|   |           |           |           |
|---|-----------|-----------|-----------|
| H | -0.022725 | 0.037435  | 0.021795  |
| S | 0.037023  | 0.005178  | 1.405674  |
| S | 2.065675  | -0.020921 | 1.649829  |
| H | 2.239728  | -1.337731 | 1.776995  |
| O | -0.264329 | -0.451018 | -1.415447 |
| H | -0.356434 | -1.399787 | -1.299854 |

#### CPHTS3a

|   |           |           |           |
|---|-----------|-----------|-----------|
| H | -1.131884 | -0.166663 | -1.613202 |
| S | -0.626336 | -0.078547 | 0.914561  |
| S | 1.271358  | -0.407059 | 0.501652  |
| H | 1.805832  | -0.348983 | 1.728453  |
| O | -1.014640 | -0.215535 | -2.557751 |
| H | -1.664411 | -0.832808 | -2.869484 |

#### HS2

|   |           |          |           |
|---|-----------|----------|-----------|
| S | -0.008073 | 0.000000 | -0.005559 |
|---|-----------|----------|-----------|

|   |          |          |          |
|---|----------|----------|----------|
| S | 0.006939 | 0.000000 | 1.964358 |
| H | 1.321995 | 0.000000 | 2.219970 |

CRHTS5a

|   |           |           |           |
|---|-----------|-----------|-----------|
| H | -0.912506 | 0.811505  | -1.417185 |
| S | -1.096127 | 0.626392  | -0.105040 |
| O | 0.132204  | 1.522959  | 0.475531  |
| H | 0.901997  | 0.951786  | 0.524287  |
| S | 0.858413  | -1.463093 | -0.225841 |
| H | 0.293034  | -1.945025 | 0.880105  |

HTS5a

|   |           |           |           |
|---|-----------|-----------|-----------|
| H | 0.141228  | 0.279085  | -0.074652 |
| S | -0.065524 | 0.026582  | 1.228479  |
| O | 1.412189  | -0.111643 | 1.736363  |
| H | 1.856697  | -1.135710 | 1.604119  |
| S | 2.464851  | -2.661350 | 1.460955  |
| H | 1.977714  | -3.047295 | 2.640304  |

CPHTS5a = CPHTS5b

|   |           |           |           |
|---|-----------|-----------|-----------|
| H | -0.878370 | 0.381304  | -1.123628 |
| S | -1.167177 | 1.574543  | -0.546252 |
| O | -0.218040 | 1.637276  | 0.604912  |
| H | 1.074836  | -0.339079 | 0.576466  |
| S | 1.274550  | -1.455478 | -0.126200 |
| H | 0.567793  | -2.205401 | 0.716181  |

CRHTS5b

|   |           |           |           |
|---|-----------|-----------|-----------|
| H | -0.982519 | 0.539184  | -1.479650 |
| S | -1.056238 | 0.485406  | -0.143968 |
| O | 0.151646  | 1.510822  | 0.233413  |
| H | 0.953089  | 0.988621  | 0.311392  |
| S | 1.048577  | -1.511825 | 0.085315  |
| H | 1.084724  | -1.559415 | -1.246516 |

HTS5b

|   |           |           |          |
|---|-----------|-----------|----------|
| H | -0.176176 | 0.022558  | 0.093919 |
| S | 0.029328  | 0.106944  | 1.418779 |
| O | 1.592525  | -0.009131 | 1.477866 |
| H | 1.972467  | -1.065927 | 1.529997 |
| S | 2.496057  | -2.628788 | 1.588255 |
| H | 3.359747  | -2.470498 | 0.585081 |

CRHTS6a

|   |           |           |           |
|---|-----------|-----------|-----------|
| H | -2.064043 | 2.055503  | -0.438150 |
| O | -1.884036 | 1.160572  | -0.708655 |
| S | -0.468471 | 0.663087  | -0.021224 |
| H | 0.342178  | 0.911823  | -1.050857 |
| S | 1.131995  | -1.655425 | 0.137622  |
| H | 0.535406  | -1.899616 | 1.303684  |

HTS6a

|   |           |           |          |
|---|-----------|-----------|----------|
| H | -0.070399 | -0.165804 | 0.075857 |
| O | 0.075452  | -0.128128 | 1.016256 |
| S | 1.633891  | 0.242749  | 1.319141 |
| H | 2.225950  | -1.114319 | 1.247849 |
| S | 2.769621  | -2.712794 | 1.342308 |
| H | 2.216598  | -2.835418 | 2.548976 |

CPHTS6a = CPHTS6b

|   |           |           |           |
|---|-----------|-----------|-----------|
| H | -1.110484 | 0.122819  | -0.446490 |
| O | -1.627593 | 0.934498  | -0.491065 |
| S | -0.664120 | 2.206729  | -0.286494 |
| H | 1.423346  | -0.651856 | 0.058966  |
| S | 0.519599  | -1.579290 | -0.252802 |
| H | 0.293016  | -1.897245 | 1.020280  |

CRHTS6b

|   |           |          |           |
|---|-----------|----------|-----------|
| H | -1.353911 | 0.100878 | -0.672613 |
| O | -1.213094 | 1.043157 | -0.556623 |
| S | 0.239910  | 1.228582 | 0.153402  |

|   |           |           |           |
|---|-----------|-----------|-----------|
| H | -0.123837 | 1.154306  | 1.438670  |
| S | 0.313039  | -1.633344 | 0.110751  |
| H | 1.136468  | -1.515331 | -0.929968 |

#### HTS6b

|   |          |           |           |
|---|----------|-----------|-----------|
| H | 0.010227 | -0.052469 | -0.020586 |
| O | 0.035923 | -0.001824 | 0.929869  |
| S | 1.582765 | -0.020185 | 1.442753  |
| H | 1.750754 | -1.478673 | 1.646364  |
| S | 1.977080 | -3.154401 | 1.580964  |
| H | 2.702860 | -3.031228 | 0.469572  |

#### HSOH

|   |           |           |          |
|---|-----------|-----------|----------|
| H | 0.029075  | -0.041630 | 0.009640 |
| S | -0.012532 | 0.033760  | 1.343827 |
| O | 1.610071  | 0.015669  | 1.641964 |
| H | 1.889386  | -0.883676 | 1.774040 |

#### SH2

|   |          |          |          |
|---|----------|----------|----------|
| H | 0.002817 | 0.000000 | 0.001547 |
| S | 0.000127 | 0.000000 | 1.332416 |
| H | 1.328916 | 0.000000 | 1.406229 |

### QCISD/6-311+G(2df,2p) optimized geometries

#### oh-qci-b2

|   |          |          |          |
|---|----------|----------|----------|
| O | 0.000000 | 0.000000 | 0.000572 |
| H | 0.000000 | 0.000000 | 0.969428 |

#### hssh-qci-b2

|   |           |           |           |
|---|-----------|-----------|-----------|
| H | -0.058507 | -0.054427 | -0.011027 |
| S | 0.018483  | 0.050173  | 1.324005  |
| S | 2.086126  | -0.001097 | 1.494854  |
| H | 2.309885  | 1.319235  | 1.418485  |

#### CRFTS1a = CRBTS1b = CRPTS3a = CRHTS3a

|   |           |           |           |
|---|-----------|-----------|-----------|
| H | -0.939663 | 1.303684  | 0.146981  |
| S | -1.428454 | 0.055302  | 0.097181  |
| S | 0.405749  | -0.893070 | -0.095151 |
| H | 0.724298  | -0.973296 | 1.204808  |
| O | 1.511250  | 1.509222  | 0.257979  |
| H | 2.039518  | 1.381358  | -0.542661 |

#### FTS1a

|   |           |           |           |
|---|-----------|-----------|-----------|
| H | -1.097626 | 1.348962  | 0.294913  |
| S | -1.392699 | 0.079196  | -0.014844 |
| S | 0.691184  | -0.700661 | -0.073217 |
| H | 1.025158  | -0.898228 | 1.213642  |
| O | 1.156975  | 1.053700  | 0.032313  |
| H | 2.037287  | 1.062277  | -0.359679 |

#### CPFTS1a = CPFTS1b

|   |           |           |           |
|---|-----------|-----------|-----------|
| H | -0.822083 | 0.897113  | -0.053118 |
| S | -2.000166 | 0.576637  | 0.511054  |
| S | 1.807199  | -0.787741 | -0.058984 |
| H | 0.943518  | -0.969169 | 0.955943  |
| O | 1.447191  | 0.817368  | -0.379461 |
| H | 2.055448  | 1.354146  | 0.132739  |

#### CRFTS1b = CRBTS1a = CRHTS3b

|   |           |           |           |
|---|-----------|-----------|-----------|
| H | 2.127870  | -0.932401 | 0.051003  |
| S | 1.304486  | 0.118181  | -0.083058 |
| S | -0.471764 | -0.955756 | -0.126812 |
| H | -0.790502 | -0.844984 | 1.170680  |
| O | -1.676722 | 1.545991  | 0.239366  |
| H | -2.029043 | 1.423365  | -0.653979 |

#### FTS1b

|   |          |           |           |
|---|----------|-----------|-----------|
| H | 1.949446 | -0.924054 | -0.035533 |
| S | 1.308581 | 0.253643  | 0.007182  |

|   |           |           |           |
|---|-----------|-----------|-----------|
| S | -0.645695 | -0.718979 | -0.084169 |
| H | -1.044403 | -0.922496 | 1.184539  |
| O | -1.193373 | 1.028333  | 0.073848  |
| H | -1.956949 | 1.066297  | -0.511971 |

#### BTS1a

|   |           |           |           |
|---|-----------|-----------|-----------|
| S | -0.146958 | 0.056936  | 0.025581  |
| S | -0.327537 | 0.474877  | 2.079824  |
| H | 1.166918  | -0.178759 | 0.029761  |
| H | -0.950570 | -0.668937 | 2.400459  |
| O | 0.413022  | 1.064749  | -1.862975 |
| H | -0.412748 | 1.539486  | -2.026929 |

#### CPBTS1a

|   |           |          |           |
|---|-----------|----------|-----------|
| S | -0.067482 | 0.185658 | -0.132188 |
| S | -0.327319 | 0.401626 | 2.161042  |
| H | 1.237987  | 0.166419 | 0.126230  |
| H | -1.650356 | 0.217203 | 2.057522  |
| O | 0.300336  | 0.918855 | -1.668897 |
| H | -0.528969 | 0.949546 | -2.155006 |

#### BTS1b

|   |           |           |           |
|---|-----------|-----------|-----------|
| S | -0.268698 | 0.108120  | 0.032910  |
| S | 0.023471  | 0.133983  | 2.101436  |
| H | 1.328733  | -0.153086 | 2.104980  |
| O | 0.126750  | -1.379445 | 3.826638  |
| H | -0.826798 | -1.455052 | 3.968033  |
| H | -0.373321 | -1.221987 | -0.107663 |

#### CPBTS1b

|   |           |           |           |
|---|-----------|-----------|-----------|
| S | -0.367712 | 0.164063  | -0.015294 |
| S | -0.005941 | -0.125348 | 2.272627  |
| H | 1.268221  | -0.396073 | 2.002232  |
| O | 0.098302  | -1.162471 | 3.662283  |
| H | -0.680862 | -0.971671 | 4.192768  |
| H | 0.283617  | -0.947546 | -0.385129 |

#### HTS3a

|   |           |           |           |
|---|-----------|-----------|-----------|
| H | -0.046359 | 0.089948  | 0.037087  |
| S | 0.014471  | 0.017818  | 1.418049  |
| S | 2.065361  | -0.031875 | 1.626737  |
| H | 2.212254  | -1.361936 | 1.726403  |
| O | -0.263990 | -0.463693 | -1.421444 |
| H | -0.282800 | -1.417107 | -1.247841 |

#### CPHTS3a

|   |           |           |           |
|---|-----------|-----------|-----------|
| H | -1.174227 | -0.158271 | -1.547160 |
| S | -0.691586 | -0.041250 | 0.978340  |
| S | 1.174948  | -0.420003 | 0.401440  |
| H | 1.802597  | -0.362521 | 1.592293  |
| O | -0.913547 | -0.237418 | -2.467834 |
| H | -1.558265 | -0.830132 | -2.852850 |

#### HTS3b

|   |           |           |           |
|---|-----------|-----------|-----------|
| H | -0.267496 | -0.248995 | -0.010837 |
| S | 0.085551  | 0.028351  | 1.299236  |
| S | 2.134573  | 0.025200  | 1.068599  |
| H | 2.335972  | -1.298417 | 1.160366  |
| O | -0.657257 | 0.076624  | -1.497499 |
| H | -0.311595 | 0.980356  | -1.559049 |

#### PTS3a

|   |           |           |           |
|---|-----------|-----------|-----------|
| H | 0.465872  | 0.061832  | -0.103172 |
| S | -0.029710 | -0.038619 | 1.293719  |
| S | 2.000764  | -0.006335 | 1.592816  |
| H | 2.308435  | -1.274440 | 1.274750  |
| O | 1.684688  | 0.098973  | -0.833832 |
| H | 1.899437  | 1.019864  | -1.035639 |

#### CPPTS3a

|   |          |           |           |
|---|----------|-----------|-----------|
| H | 0.900072 | 0.452510  | -0.547755 |
| S | 0.100150 | 0.192147  | 1.990062  |
| S | 1.765495 | -0.881735 | 2.177381  |
| H | 2.256216 | -0.754718 | 0.927597  |
| O | 1.648453 | 0.096437  | -1.033837 |
| H | 1.924351 | 0.801366  | -1.619138 |

|     |           |          |           |
|-----|-----------|----------|-----------|
| HS2 | hs2-qci   |          |           |
| S   | -0.008073 | 0.000000 | -0.015382 |
| S   | 0.002231  | 0.000000 | 1.973380  |
| H   | 1.326703  | 0.000000 | 2.220771  |

### Reactions starting by HSSCH<sub>3</sub> + OH

BH&HLYP/6-311+G(2df,2p) optimized geometries

|        |          |           |          |
|--------|----------|-----------|----------|
| CH3SSH |          |           |          |
| H      | 0.037441 | 0.099995  | 0.030864 |
| S      | 0.011191 | -0.051260 | 1.357326 |
| S      | 2.028165 | -0.002300 | 1.729170 |
| C      | 2.358877 | 1.761495  | 1.930886 |
| H      | 3.400946 | 1.838495  | 2.214084 |
| H      | 2.200321 | 2.294504  | 1.005619 |
| H      | 1.743588 | 2.178187  | 2.713412 |

|        |           |           |           |
|--------|-----------|-----------|-----------|
| CH3SOH |           |           |           |
| C      | -0.006264 | -0.002036 | 0.009996  |
| S      | 0.017365  | -0.019174 | 1.798554  |
| H      | 1.031529  | 0.023032  | -0.300597 |
| H      | -0.472606 | -0.889721 | -0.393989 |
| H      | -0.505651 | 0.884455  | -0.353515 |
| O      | -1.599357 | 0.067333  | 2.125678  |
| H      | -1.944537 | -0.813806 | 2.221986  |

|      |           |           |           |
|------|-----------|-----------|-----------|
| CH3S |           |           |           |
| C    | 0.002203  | 0.006491  | 0.004257  |
| S    | -0.001543 | -0.006266 | 1.794578  |
| H    | 1.007290  | -0.003315 | -0.389823 |
| H    | -0.495911 | -0.904597 | -0.311708 |
| H    | -0.554711 | 0.845968  | -0.384473 |

|        |           |           |           |
|--------|-----------|-----------|-----------|
| CH2SSH |           |           |           |
| C      | 0.002435  | 0.059806  | -0.002756 |
| S      | 0.017136  | 0.092883  | 1.702006  |
| H      | 0.908909  | 0.072447  | -0.570913 |
| H      | -0.957376 | 0.112356  | -0.476758 |
| S      | 1.857660  | -0.689409 | 2.209212  |
| H      | 2.522523  | 0.462982  | 2.308656  |

|       |           |           |           |
|-------|-----------|-----------|-----------|
| CH3SH |           |           |           |
| C     | 0.000487  | -0.001236 | 0.003951  |
| S     | -0.000741 | -0.011611 | 1.814760  |
| H     | 1.317867  | 0.014678  | 1.990969  |
| H     | -1.035730 | -0.021150 | -0.299856 |
| H     | 0.495532  | -0.874180 | -0.392636 |
| H     | 0.458693  | 0.896063  | -0.382255 |

|       |           |           |           |
|-------|-----------|-----------|-----------|
| CH3SO |           |           |           |
| C     | -0.000282 | -0.002796 | 0.000659  |
| S     | 0.000900  | -0.020179 | 1.795359  |
| O     | 1.427509  | 0.023628  | 2.203369  |
| H     | -1.029950 | -0.034470 | -0.331232 |
| H     | 0.474833  | 0.902569  | -0.349937 |
| H     | 0.534448  | -0.867427 | -0.366587 |

CRBTS1a = CRFTS1b

|   |           |           |           |
|---|-----------|-----------|-----------|
| S | -0.549076 | 0.260301  | -0.181576 |
| S | -0.320031 | -0.029590 | 1.838380  |
| H | 0.710144  | 0.563918  | -0.500841 |
| C | -0.573300 | 1.628813  | 2.507510  |
| O | 0.697553  | -1.724889 | -1.849075 |
| H | -0.053523 | -2.257093 | -1.576049 |
| H | -0.540642 | 1.521711  | 3.584215  |
| H | 0.212469  | 2.298061  | 2.191624  |
| H | -1.537037 | 2.016417  | 2.215308  |

BTS1a

|   |           |           |           |
|---|-----------|-----------|-----------|
| S | 0.065736  | -0.044655 | -0.061294 |
| S | 0.063259  | 0.025654  | 2.036105  |
| H | 1.381817  | -0.109858 | -0.200780 |
| C | -0.807890 | 1.585893  | 2.308884  |
| O | 0.115173  | -1.297242 | -1.746489 |
| H | -0.786753 | -1.607886 | -1.806929 |
| H | -0.924242 | 1.676855  | 3.380725  |
| H | -0.234558 | 2.419997  | 1.935241  |
| H | -1.785879 | 1.567598  | 1.852239  |

CPBTS1a

|   |           |           |           |
|---|-----------|-----------|-----------|
| S | 0.277918  | -0.169480 | -0.105242 |
| S | 0.113526  | 0.049199  | 2.176686  |
| H | 1.169599  | -1.113255 | 0.149906  |
| C | -0.991052 | 1.472106  | 2.180653  |
| O | -0.081432 | -0.985472 | -1.587132 |
| H | -0.679428 | -0.435688 | -2.084759 |
| H | -0.871472 | 1.972768  | 3.131356  |
| H | -0.731870 | 2.160527  | 1.387991  |
| H | -2.020373 | 1.162167  | 2.079538  |

CRBTS1b = CRFTS1a = CRHTS3b

|   |           |           |           |
|---|-----------|-----------|-----------|
| S | 0.136130  | -0.488523 | 0.121420  |
| S | -0.129346 | -0.071346 | 2.113758  |
| H | 1.356482  | 0.021465  | -0.049123 |
| O | -0.177373 | 1.901981  | -1.223323 |
| H | -0.954704 | 1.493722  | -1.610234 |
| C | -0.750161 | 1.624626  | 2.103068  |
| H | -0.027235 | 2.298825  | 1.672561  |
| H | -1.682644 | 1.689690  | 1.564826  |
| H | -0.914044 | 1.877817  | 3.142857  |

BTS1b

|   |           |           |           |
|---|-----------|-----------|-----------|
| S | 0.118282  | 0.011489  | -0.025311 |
| S | -0.310839 | -0.130348 | 2.007175  |
| H | 1.270906  | 0.662215  | 0.079663  |
| O | -0.064570 | 1.242581  | -1.738836 |
| H | -0.935159 | 1.005439  | -2.054753 |
| C | -0.665128 | 1.583695  | 2.451460  |
| H | 0.210401  | 2.204000  | 2.331101  |
| H | -1.480102 | 1.970088  | 1.858956  |
| H | -0.953201 | 1.571097  | 3.494065  |

CPBTS1b

|   |           |           |           |
|---|-----------|-----------|-----------|
| S | 0.119807  | 0.176703  | -0.183411 |
| S | -0.402242 | -0.137967 | 2.029290  |
| H | 0.980014  | 1.113166  | 0.184643  |
| O | -0.058516 | 1.006025  | -1.695754 |
| H | -0.518626 | 0.420671  | -2.290325 |
| C | -0.606925 | 1.559457  | 2.601152  |
| H | 0.272028  | 2.154198  | 2.393793  |
| H | -1.472912 | 2.013132  | 2.142664  |
| H | -0.760176 | 1.523197  | 3.671090  |

FTS1b

|   |           |           |          |
|---|-----------|-----------|----------|
| H | -0.009670 | -0.031231 | 0.124358 |
| S | 0.049509  | -0.124669 | 1.459383 |
| S | 2.113608  | 0.004854  | 2.104179 |

|   |           |           |          |
|---|-----------|-----------|----------|
| C | 2.170162  | 1.788474  | 2.343791 |
| O | 0.474233  | -1.868129 | 1.244828 |
| H | -0.236837 | -2.344258 | 1.665765 |
| H | 3.131423  | 1.994467  | 2.796208 |
| H | 2.104383  | 2.320383  | 1.406175 |
| H | 1.392011  | 2.120623  | 3.015356 |

#### CPFTS1b

|   |           |           |          |
|---|-----------|-----------|----------|
| H | -0.683546 | -0.882178 | 0.006762 |
| S | -0.742017 | -0.380093 | 1.245112 |
| S | 3.130629  | 0.332651  | 1.705907 |
| C | 2.438870  | 1.756998  | 2.541879 |
| O | 0.312326  | -1.392673 | 1.991899 |
| H | 1.195536  | -1.021423 | 1.917755 |
| H | 2.320433  | 1.498027  | 3.588005 |
| H | 3.077606  | 2.621508  | 2.453023 |
| H | 1.454746  | 1.962737  | 2.142787 |

#### FTS1a

|   |           |           |          |
|---|-----------|-----------|----------|
| H | 0.178431  | 0.214177  | 0.023654 |
| S | -0.021215 | 0.018005  | 1.331656 |
| S | 1.968594  | -0.062089 | 2.272407 |
| C | 2.698396  | 1.588581  | 2.387972 |
| O | -0.002326 | 1.773105  | 1.645264 |
| H | -0.924988 | 2.008417  | 1.704114 |
| H | 3.692520  | 1.426114  | 2.787907 |
| H | 2.777496  | 2.050012  | 1.416909 |
| H | 2.129950  | 2.215685  | 3.052836 |

#### CPFTS1a

|   |           |           |           |
|---|-----------|-----------|-----------|
| H | -0.831263 | -0.792756 | -0.499966 |
| S | -1.977912 | -0.182944 | -0.176002 |
| S | 1.925843  | -0.057498 | -0.894715 |
| H | -0.831263 | -0.792756 | -0.499966 |
| S | -1.977912 | -0.182944 | -0.176002 |
| S | 1.925843  | -0.057498 | -0.894715 |
| C | 1.687375  | 1.010339  | 0.522036  |
| O | -1.545837 | 1.356152  | -0.608081 |
| H | -1.794769 | 1.500402  | -1.514480 |
| H | 1.505278  | 0.398199  | 1.396454  |
| H | 2.534316  | 1.657144  | 0.689448  |
| H | 0.792157  | 1.595511  | 0.348423  |

#### CBTS2a = CRFTS2b

|   |           |           |           |
|---|-----------|-----------|-----------|
| S | -0.549076 | 0.260301  | -0.181576 |
| S | -0.320031 | -0.029590 | 1.838380  |
| H | 0.710144  | 0.563918  | -0.500841 |
| C | -0.573300 | 1.628813  | 2.507510  |
| O | 0.697553  | -1.724889 | -1.849075 |
| H | -0.053523 | -2.257093 | -1.576049 |
| H | -0.540642 | 1.521711  | 3.584215  |
| H | 0.212469  | 2.298061  | 2.191624  |
| H | -1.537037 | 2.016417  | 2.215308  |

#### BTS2a

|   |           |           |           |
|---|-----------|-----------|-----------|
| S | 0.065736  | -0.044655 | -0.061294 |
| S | 0.063259  | 0.025654  | 2.036105  |
| H | 1.381817  | -0.109858 | -0.200780 |
| C | -0.807890 | 1.585893  | 2.308884  |
| O | 0.115173  | -1.297242 | -1.746489 |
| H | -0.786753 | -1.607886 | -1.806929 |
| H | -0.924242 | 1.676855  | 3.380725  |
| H | -0.234558 | 2.419997  | 1.935241  |
| H | -1.785879 | 1.567598  | 1.852239  |

#### CPBTS2a

|   |           |           |           |
|---|-----------|-----------|-----------|
| S | 0.277918  | -0.169480 | -0.105242 |
| S | 0.113526  | 0.049199  | 2.176686  |
| H | 1.169599  | -1.113255 | 0.149906  |
| C | -0.991052 | 1.472106  | 2.180653  |

|   |           |           |           |
|---|-----------|-----------|-----------|
| O | -0.081432 | -0.985472 | -1.587132 |
| H | -0.679428 | -0.435688 | -2.084759 |
| H | -0.871472 | 1.972768  | 3.131356  |
| H | -0.731870 | 2.160527  | 1.387991  |
| H | -2.020373 | 1.162167  | 2.079538  |

CRBTS2b = CRFTS2a

|   |           |           |           |
|---|-----------|-----------|-----------|
| S | 0.136130  | -0.488523 | 0.121420  |
| S | -0.129346 | -0.071346 | 2.113758  |
| H | 1.356482  | 0.021465  | -0.049123 |
| O | -0.177373 | 1.901981  | -1.223323 |
| H | -0.954704 | 1.493722  | -1.610234 |
| C | -0.750161 | 1.624626  | 2.103068  |
| H | -0.027235 | 2.298825  | 1.672561  |
| H | -1.682644 | 1.689690  | 1.564826  |
| H | -0.914044 | 1.877817  | 3.142857  |

BTS2b

|   |           |           |           |
|---|-----------|-----------|-----------|
| S | 0.118282  | 0.011489  | -0.025311 |
| S | -0.310839 | -0.130348 | 2.007175  |
| H | 1.270906  | 0.662215  | 0.079663  |
| O | -0.064570 | 1.242581  | -1.738836 |
| H | -0.935159 | 1.005439  | -2.054753 |
| C | -0.665128 | 1.583695  | 2.451460  |
| H | 0.210401  | 2.204000  | 2.331101  |
| H | -1.480102 | 1.970088  | 1.858956  |
| H | -0.953201 | 1.571097  | 3.494065  |

CPBTS2b = CPFTS2a

|   |           |           |           |
|---|-----------|-----------|-----------|
| S | 0.119807  | 0.176703  | -0.183411 |
| S | -0.402242 | -0.137967 | 2.029290  |
| H | 0.980014  | 1.113166  | 0.184643  |
| O | -0.058516 | 1.006025  | -1.695754 |
| H | -0.518626 | 0.420671  | -2.290325 |
| C | -0.606925 | 1.559457  | 2.601152  |
| H | 0.272028  | 2.154198  | 2.393793  |
| H | -1.472912 | 2.013132  | 2.142664  |
| H | -0.760176 | 1.523197  | 3.671090  |

FTS2b

|   |           |           |           |
|---|-----------|-----------|-----------|
| C | 0.132153  | 0.106998  | -0.062428 |
| S | 0.159841  | 0.225706  | 1.728386  |
| S | 1.947726  | -0.718775 | 2.512866  |
| H | 2.614728  | 0.431948  | 2.612485  |
| O | -0.488584 | -1.492861 | 1.776832  |
| H | -0.977774 | -1.547598 | 2.593448  |
| H | 0.787824  | -0.698372 | -0.354958 |
| H | -0.875427 | -0.109722 | -0.382687 |
| H | 0.481546  | 1.045153  | -0.466853 |

CPFTS2b

|   |           |           |           |
|---|-----------|-----------|-----------|
| C | 0.016601  | 0.030024  | -0.045839 |
| S | -0.168803 | 0.204661  | 1.720441  |
| S | 2.532154  | -0.058643 | 2.232158  |
| H | 2.316381  | 0.534612  | 3.404661  |
| O | -0.312984 | -1.343509 | 2.192960  |
| H | 0.569480  | -1.658478 | 2.403337  |
| H | -0.848227 | -0.472696 | -0.453247 |
| H | 0.075696  | 1.034591  | -0.445086 |
| H | 0.921371  | -0.508049 | -0.286926 |

FTS2a

|   |           |           |           |
|---|-----------|-----------|-----------|
| C | 0.082151  | -0.043306 | -0.033122 |
| S | 0.251419  | -0.163804 | 1.744408  |
| S | 2.291860  | 0.571070  | 2.134490  |
| H | 2.047005  | 1.879313  | 2.191541  |
| O | -0.254369 | 1.538108  | 2.138141  |
| H | -1.138611 | 1.438732  | 2.482994  |
| H | -0.249423 | 0.950577  | -0.291203 |
| H | 1.032163  | -0.255536 | -0.500357 |
| H | -0.656479 | -0.775093 | -0.330984 |



## CRPTS3a = CRPTS3b = CRHTS3a

|   |           |           |           |
|---|-----------|-----------|-----------|
| H | -1.760901 | 0.194505  | -0.355333 |
| S | -1.220949 | 0.281856  | 0.863203  |
| S | 0.735015  | 0.277526  | 0.252955  |
| C | 1.112060  | -1.472858 | 0.071223  |
| O | 0.014635  | 0.243312  | -2.118079 |
| H | 0.377371  | 1.101640  | -2.337733 |
| H | 2.154412  | -1.526854 | -0.214504 |
| H | 0.963783  | -1.985588 | 1.009034  |
| H | 0.502090  | -1.898497 | -0.709088 |

## PTS3a

|   |           |           |           |
|---|-----------|-----------|-----------|
| H | -0.059710 | 0.062882  | -0.031701 |
| S | -0.075538 | 0.044423  | 1.443145  |
| S | 1.924462  | -0.001508 | 1.069900  |
| C | 2.294940  | -1.743768 | 0.838712  |
| O | 0.896847  | 0.012044  | -1.091112 |
| H | 1.046686  | 0.865744  | -1.492536 |
| H | 3.334333  | -1.811611 | 0.547257  |
| H | 2.133835  | -2.268872 | 1.768119  |
| H | 1.661958  | -2.134900 | 0.058624  |

## CPPTS3a = CPPTS3b = CPHTS3a = CPHTS3b

|   |           |           |           |
|---|-----------|-----------|-----------|
| H | -0.802693 | 0.272398  | -1.663298 |
| S | -0.869259 | 0.722310  | 0.847586  |
| S | 0.769559  | -0.200193 | 1.381597  |
| C | 1.216139  | -1.300164 | 0.020159  |
| O | -0.421656 | -0.010957 | -2.491302 |
| H | -0.813009 | 0.532176  | -3.163955 |
| H | 2.156794  | -1.757885 | 0.295091  |
| H | 0.457504  | -2.058753 | -0.097539 |
| H | 1.320622  | -0.740446 | -0.895956 |

## PTS3b

|   |          |           |           |
|---|----------|-----------|-----------|
| H | 0.004286 | -0.065893 | -0.002808 |
| S | 0.041878 | -0.046227 | 1.460438  |
| S | 2.034461 | -0.049761 | 1.098993  |
| C | 2.461965 | -1.795299 | 1.004293  |
| O | 0.922250 | 0.090001  | -1.093849 |
| H | 1.098508 | -0.589076 | -1.742956 |
| H | 3.491552 | -1.855982 | 0.678003  |
| H | 2.358237 | -2.244385 | 1.980785  |
| H | 1.814584 | -2.290938 | 0.298077  |

## HTS3a

|   |           |           |           |
|---|-----------|-----------|-----------|
| H | -0.077291 | 0.046774  | 0.039952  |
| S | -0.034870 | 0.123079  | 1.415829  |
| S | 1.976607  | 0.025558  | 1.706627  |
| C | 2.325926  | -1.742063 | 1.589718  |
| O | -0.139920 | 0.542646  | -1.464706 |
| H | 0.117633  | 1.461885  | -1.359363 |
| H | 3.378524  | -1.855439 | 1.814896  |
| H | 1.741280  | -2.292663 | 2.310370  |
| H | 2.131931  | -2.104056 | 0.591542  |

## HTS3b

|   |           |           |           |
|---|-----------|-----------|-----------|
| H | 0.026239  | 0.052558  | -0.038925 |
| S | -0.017566 | 0.118602  | 1.339274  |
| S | 1.971286  | 0.033435  | 1.754015  |
| C | 2.281469  | -1.734569 | 1.946827  |
| O | -0.121274 | -0.589428 | -1.476353 |
| H | -0.521715 | -1.439275 | -1.277879 |
| H | 3.312067  | -1.825361 | 2.264835  |
| H | 1.634280  | -2.155836 | 2.700599  |
| H | 2.150962  | -2.248799 | 1.006618  |

## CRHTS11a = CRHTS1b

|   |           |           |           |
|---|-----------|-----------|-----------|
| S | -0.024515 | 0.222146  | -0.069579 |
| S | 0.088497  | -0.355936 | 1.898287  |
| C | 1.686800  | 0.115430  | -0.637673 |

|   |          |           |           |
|---|----------|-----------|-----------|
| H | 2.087596 | -0.874095 | -0.481927 |
| H | 1.652519 | 0.327101  | -1.698728 |
| H | 2.303989 | 0.853761  | -0.148396 |
| H | 0.421474 | 0.811132  | 2.456121  |
| O | 3.014516 | -2.199443 | 1.813640  |
| H | 2.176602 | -1.745603 | 1.975328  |

#### HTS11a

|   |           |           |           |
|---|-----------|-----------|-----------|
| S | -0.008096 | -0.027271 | 0.012157  |
| S | -0.113261 | 0.021165  | 2.062852  |
| C | 1.731856  | -0.024978 | -0.298906 |
| H | 2.238743  | -1.047865 | 0.105330  |
| H | 1.891726  | -0.045758 | -1.368412 |
| H | 2.261643  | 0.786663  | 0.173697  |
| H | -0.033099 | 1.342082  | 2.239810  |
| O | 2.858522  | -2.054501 | 0.654688  |
| H | 2.632045  | -1.883411 | 1.569839  |

#### CPHTS11a = CPHTS11b

|   |           |           |           |
|---|-----------|-----------|-----------|
| S | -0.073009 | -0.105156 | 0.243906  |
| S | -0.168086 | 0.598193  | 2.176001  |
| C | 1.508112  | 0.294189  | -0.266357 |
| H | 2.810958  | -1.578727 | 0.489019  |
| H | 1.784626  | -0.050582 | -1.244353 |
| H | 2.077523  | 1.049118  | 0.235726  |
| H | -0.633085 | 1.818277  | 1.900352  |
| O | 3.406124  | -2.310569 | 0.621757  |
| H | 2.918385  | -2.952072 | 1.123199  |

#### HTS11b

|   |           |           |            |
|---|-----------|-----------|------------|
| S | 0.096122  | -0.169637 | 0.012842   |
| S | 0.064089  | -0.051765 | 2.063286   |
| C | 1.804123  | 0.044234  | -0.395298  |
| H | 2.461562  | -0.926748 | -0.1111050 |
| H | 1.889352  | 0.148166  | -1.467833  |
| H | 2.279219  | 0.857150  | 0.131489   |
| H | -0.100550 | 1.268047  | 2.175485   |
| O | 3.171969  | -2.013035 | 0.091577   |
| H | 2.459410  | -2.650182 | 0.029276   |

#### CRHTS5a = CRHTS5b

|   |           |           |           |
|---|-----------|-----------|-----------|
| H | -1.046557 | 1.847047  | -1.760004 |
| S | -1.402026 | 1.456197  | -0.531250 |
| O | 0.029680  | 1.675611  | 0.241408  |
| H | 0.543092  | 0.866741  | 0.167427  |
| S | 1.362168  | -1.349222 | -0.049290 |
| C | -0.039860 | -2.130041 | 0.744798  |
| H | -0.954683 | -1.732941 | 0.325839  |
| H | -0.007225 | -3.203688 | 0.647440  |
| H | -0.015760 | -1.858727 | 1.794208  |

#### HTS5a

|   |           |           |           |
|---|-----------|-----------|-----------|
| H | 0.187734  | 0.084812  | -0.216467 |
| S | -0.010584 | -0.046585 | 1.106057  |
| O | 1.464801  | -0.022528 | 1.632053  |
| H | 2.033889  | -1.042668 | 1.603934  |
| S | 2.645126  | -2.511915 | 1.572699  |
| C | 1.180605  | -3.352441 | 2.192571  |
| H | 0.288615  | -2.885889 | 1.789994  |
| H | 1.203797  | -4.373192 | 1.834362  |
| H | 1.141802  | -3.350985 | 3.271275  |

#### CPHTS5a = CPHTS5b

|   |           |           |           |
|---|-----------|-----------|-----------|
| H | -0.245590 | 0.881502  | -1.407444 |
| S | -1.251555 | 1.720952  | -1.056075 |
| O | -1.569851 | 1.303483  | 0.343032  |
| H | 1.826080  | -0.374832 | 0.592889  |
| S | 1.283412  | -1.215268 | -0.284743 |
| C | -0.065683 | -1.820005 | 0.764231  |
| H | -0.710019 | -1.009232 | 1.064193  |
| H | -0.628541 | -2.516376 | 0.160098  |

H 0.323083 -2.341394 1.625070

#### HTS5b

C -0.089058 0.041379 -0.032641  
S -0.029315 -0.160329 1.756480  
H 0.836413 -0.263810 -0.497197  
H -0.919177 -0.504424 -0.456391  
H -0.242286 1.095895 -0.224564  
H 0.227966 -1.734222 1.801006  
O 0.416537 -2.883618 1.832319  
S 1.062623 -3.378572 3.173053  
H 2.367005 -3.202235 2.903191

#### CRHTS6a

H -1.311396 0.846594 -1.897080  
O -1.438709 0.725833 -0.962438  
S -0.551867 1.866468 -0.153030  
H 0.571866 1.154115 -0.005429  
S 1.364560 -1.610364 0.007283  
C -0.167580 -1.883971 0.891797  
H -0.111068 -1.389257 1.853338  
H -0.962963 -1.406077 0.332336  
H -0.377457 -2.933775 1.024241

#### HTS6a

H 0.265772 -0.529531 -0.493719  
O 0.031033 -0.606240 0.425927  
S 1.192052 0.086068 1.346350  
H 2.116982 -1.111987 1.462738  
S 2.799047 -2.598207 1.567256  
C 1.387729 -3.380239 2.367611  
H 1.260052 -3.024071 3.378018  
H 0.486947 -3.220442 1.794277  
H 1.598765 -4.441887 2.391119

#### CPHTS6a = CPHTS6b

H -0.335708 0.379164 -1.217603  
O -0.931827 1.078768 -1.517442  
S -1.553145 1.845912 -0.248618  
H 1.592137 -0.355952 0.612320  
S 0.954362 -1.218482 -0.175932  
C -0.254170 -1.812017 1.036327  
H 0.240268 -2.330442 1.842683  
H -0.850073 -0.997078 1.415340  
H -0.893732 -2.506277 0.511966

#### CRHTS6b

C -0.583142 -2.068296 0.982299  
S 1.047562 -1.733405 0.322947  
H -0.832473 -3.115719 0.919864  
H -0.592045 -1.751462 2.018947  
H -1.310440 -1.468069 0.451935  
H -0.190622 1.951039 -1.646879  
S -0.766045 1.707114 -0.464371  
O 0.582190 1.546704 0.458291  
H 0.856345 0.625882 0.439630  
  
H 1.562746 -4.448468 2.386021  
H 1.452826 -2.881864 3.171245  
H 0.361811 -3.293654 1.836116  
H 2.068645 -1.271641 0.935121  
S 1.521922 0.140732 0.998766  
O 2.724550 0.847597 1.847578  
H 2.535656 0.793696 2.778898

#### RHTS8a

C -1.105643 0.924179 -1.417743  
S -0.766917 0.690231 0.318740  
O 0.688762 1.396545 0.470204  
H 1.349561 0.712682 0.336230  
S 0.604325 -1.676600 -0.062256

|   |           |           |           |
|---|-----------|-----------|-----------|
| H | 0.378189  | -1.957866 | 1.219589  |
| H | -2.091145 | 0.511737  | -1.592961 |
| H | -1.107244 | 1.979515  | -1.647888 |
| H | -0.382280 | 0.400834  | -2.025363 |

#### HTS8a

|   |           |           |           |
|---|-----------|-----------|-----------|
| C | -0.076961 | 0.101128  | -0.200654 |
| S | 0.101110  | 0.067683  | 1.575154  |
| O | 1.647266  | -0.127900 | 1.766494  |
| H | 1.982708  | -1.149826 | 1.657126  |
| S | 2.452157  | -2.810021 | 1.550253  |
| H | 2.067987  | -3.056435 | 2.802839  |
| H | -1.120431 | 0.302637  | -0.406327 |
| H | 0.538924  | 0.882295  | -0.622404 |
| H | 0.194398  | -0.859892 | -0.615912 |

#### CPHTS8a = CPHTS8b

|   |           |           |           |
|---|-----------|-----------|-----------|
| C | -1.205960 | 0.950302  | -1.458832 |
| S | -1.124006 | 1.696816  | 0.169323  |
| O | 0.195943  | 1.311373  | 0.733663  |
| H | 1.240884  | -0.687410 | 0.416065  |
| S | 1.492967  | -1.914163 | -0.044458 |
| H | 1.032823  | -2.508217 | 1.053935  |
| H | -2.177719 | 1.179360  | -1.876467 |
| H | -0.427539 | 1.364386  | -2.084398 |
| H | -1.078669 | -0.119517 | -1.369353 |

#### CRHTS8b

|   |           |           |           |
|---|-----------|-----------|-----------|
| C | -0.988276 | 0.780763  | -1.502498 |
| S | -0.795468 | 0.480626  | 0.247877  |
| O | 0.467940  | 1.440821  | 0.601177  |
| H | -1.184956 | 1.829402  | -1.672711 |
| H | -1.842261 | 0.196481  | -1.821635 |
| H | -0.109164 | 0.470312  | -2.048319 |
| H | 1.262431  | 0.908718  | 0.512369  |
| S | 1.117397  | -1.581246 | 0.187907  |
| H | 0.852847  | -1.714563 | -1.111073 |

#### HTS8b

|   |           |           |           |
|---|-----------|-----------|-----------|
| C | -0.064451 | 0.042682  | -0.001911 |
| S | 0.030157  | 0.040279  | 1.780423  |
| O | 1.576942  | -0.037499 | 2.042241  |
| H | 0.498265  | 0.872175  | -0.405260 |
| H | -1.110447 | 0.145888  | -0.260585 |
| H | 0.314203  | -0.894110 | -0.388175 |
| H | 1.977779  | -1.039532 | 2.017870  |
| S | 2.552720  | -2.669775 | 1.926533  |
| H | 3.564263  | -2.384434 | 1.106291  |

### QCISD/6-311+G(2df,2p) optimized geometries

#### ch3ssh

|   |          |           |          |
|---|----------|-----------|----------|
| H | 0.049686 | 0.120074  | 0.031564 |
| S | 0.006829 | -0.043543 | 1.363746 |
| S | 2.038888 | -0.020124 | 1.736240 |
| C | 2.357838 | 1.756336  | 1.929121 |
| H | 3.405932 | 1.849754  | 2.212202 |
| H | 2.188920 | 2.284505  | 0.994453 |
| H | 1.732435 | 2.172113  | 2.714034 |

#### oh

|   |          |          |          |
|---|----------|----------|----------|
| O | 0.000000 | 0.000000 | 0.000572 |
| H | 0.000000 | 0.000000 | 0.969428 |

#### CRBTS1a = CRFTS1b

|   |           |           |           |
|---|-----------|-----------|-----------|
| S | -0.713050 | 0.305601  | -0.195887 |
| S | -0.451547 | -0.056753 | 1.822742  |
| H | 0.568737  | 0.527943  | -0.528632 |
| C | -0.545245 | 1.621609  | 2.507645  |
| O | 0.842488  | -1.739868 | -1.808435 |

|   |           |           |           |
|---|-----------|-----------|-----------|
| H | 0.032863  | -2.210553 | -1.561458 |
| H | -0.491861 | 1.511489  | 3.590382  |
| H | 0.290533  | 2.226070  | 2.165581  |
| H | -1.486362 | 2.092110  | 2.237558  |

#### BTS1a

|   |           |           |           |
|---|-----------|-----------|-----------|
| S | -0.044692 | -0.031037 | -0.080885 |
| S | -0.055135 | -0.040012 | 2.017054  |
| H | 1.277899  | 0.058695  | -0.237598 |
| C | -0.785303 | 1.594792  | 2.333825  |
| O | 0.183961  | -1.350686 | -1.793732 |
| H | -0.696614 | -1.747884 | -1.803908 |
| H | -0.910171 | 1.664755  | 3.413764  |
| H | -0.125333 | 2.386928  | 1.991964  |
| H | -1.757949 | 1.680805  | 1.857217  |

#### CPBTS1a

|   |           |           |           |
|---|-----------|-----------|-----------|
| S | 0.283370  | -0.153961 | -0.073340 |
| S | 0.143923  | 0.044287  | 2.186997  |
| H | 1.177606  | -1.113791 | 0.155145  |
| C | -0.984215 | 1.463036  | 2.161749  |
| O | -0.103468 | -0.982553 | -1.575723 |
| H | -0.715219 | -0.406502 | -2.043534 |
| H | -0.905811 | 1.963051  | 3.124725  |
| H | -0.699342 | 2.160868  | 1.376000  |
| H | -2.011427 | 1.138436  | 2.016978  |

#### CRBTS1b = CRFTS1a

|   |           |           |           |
|---|-----------|-----------|-----------|
| S | 0.090919  | -0.557173 | 0.161731  |
| S | -0.034405 | -0.044987 | 2.161301  |
| H | 1.279553  | -0.000224 | -0.116899 |
| O | -0.052048 | 1.951615  | -1.207596 |
| H | -0.891135 | 1.581649  | -1.518355 |
| C | -0.773960 | 1.611020  | 2.082493  |
| H | -0.134091 | 2.293750  | 1.532443  |
| H | -1.758314 | 1.569925  | 1.624526  |
| H | -0.869413 | 1.942681  | 3.116168  |

#### BTS1b

|   |           |           |           |
|---|-----------|-----------|-----------|
| S | 0.118282  | 0.011489  | -0.025311 |
| S | -0.310839 | -0.130348 | 2.007175  |
| H | 1.270906  | 0.662215  | 0.079663  |
| O | -0.064570 | 1.242581  | -1.738836 |
| H | -0.935159 | 1.005439  | -2.054753 |
| C | -0.665128 | 1.583695  | 2.451460  |
| H | 0.210401  | 2.204000  | 2.331101  |
| H | -1.480102 | 1.970088  | 1.858956  |
| H | -0.953201 | 1.571097  | 3.494065  |

#### CPBTS1b

|   |           |           |           |
|---|-----------|-----------|-----------|
| S | 0.130436  | 0.162004  | -0.146581 |
| S | -0.384418 | -0.171772 | 2.037372  |
| H | 0.962833  | 1.131380  | 0.231025  |
| O | -0.075419 | 1.041487  | -1.663076 |
| H | -0.545369 | 0.439994  | -2.248414 |
| C | -0.598336 | 1.549423  | 2.567932  |
| H | 0.297110  | 2.135466  | 2.366577  |
| H | -1.452604 | 1.998545  | 2.067694  |
| H | -0.781782 | 1.542056  | 3.640613  |

#### FTS1b

|   |           |           |          |
|---|-----------|-----------|----------|
| H | 0.000150  | -0.009159 | 0.142758 |
| S | 0.056232  | -0.128536 | 1.483810 |
| S | 2.143015  | -0.011403 | 2.121627 |
| C | 2.170127  | 1.786420  | 2.338948 |
| O | 0.490412  | -1.878071 | 1.262239 |
| H | -0.273830 | -2.339176 | 1.623459 |
| H | 3.133444  | 2.021747  | 2.789541 |
| H | 2.089875  | 2.305864  | 1.387053 |
| H | 1.379398  | 2.112828  | 3.010608 |

## CPFTS1b

|   |           |           |          |
|---|-----------|-----------|----------|
| H | -0.743559 | -0.979709 | 0.175540 |
| S | -0.660309 | -0.300029 | 1.333745 |
| S | 3.170600  | 0.419025  | 1.506806 |
| C | 2.388071  | 1.702784  | 2.501805 |
| O | 0.423442  | -1.278433 | 2.129063 |
| H | 1.308033  | -0.955604 | 1.904053 |
| H | 1.872323  | 1.263594  | 3.352915 |
| H | 3.107819  | 2.449007  | 2.824497 |
| H | 1.638163  | 2.174918  | 1.864705 |

## FTS1a

|   |           |           |          |
|---|-----------|-----------|----------|
| H | 0.256494  | 0.262357  | 0.013096 |
| S | -0.026817 | 0.023875  | 1.306018 |
| S | 1.949423  | -0.079799 | 2.332826 |
| C | 2.691736  | 1.579981  | 2.378855 |
| O | -0.010622 | 1.770486  | 1.717022 |
| H | -0.946127 | 1.998714  | 1.692607 |
| H | 3.702525  | 1.431334  | 2.760656 |
| H | 2.746780  | 2.010685  | 1.383635 |
| H | 2.133465  | 2.234373  | 3.038002 |

## CPFTS1a

|   |           |           |           |
|---|-----------|-----------|-----------|
| H | -0.774422 | -0.779139 | -0.451847 |
| S | -1.918985 | -0.161671 | -0.104872 |
| S | 1.909509  | -0.010370 | -0.957958 |
| C | 1.652839  | 0.998160  | 0.514370  |
| O | -1.503473 | 1.377517  | -0.622217 |
| H | -1.792205 | 1.456661  | -1.533495 |
| H | 1.411057  | 0.357789  | 1.360665  |
| H | 2.522052  | 1.610534  | 0.736456  |
| H | 0.788814  | 1.635069  | 0.322015  |

## CBTS2a = CRFTS2b

|   |           |           |           |
|---|-----------|-----------|-----------|
| S | 0.141615  | 0.473861  | -0.159527 |
| S | -0.340143 | -0.331980 | 1.680075  |
| C | 1.916160  | 0.147688  | -0.269404 |
| H | -0.191483 | 0.797091  | 2.393194  |
| O | -0.101906 | -1.745378 | -1.008679 |
| H | -0.963217 | -1.584389 | -1.415998 |
| H | 2.214661  | 0.427253  | -1.278667 |
| H | 2.456321  | 0.747776  | 0.457877  |
| H | 2.089511  | -0.912437 | -0.117761 |

## BTS2a

|   |           |           |           |
|---|-----------|-----------|-----------|
| S | -0.013933 | 0.113012  | -0.064750 |
| S | -0.277700 | -0.095919 | 2.000173  |
| C | 1.788390  | 0.062540  | -0.177626 |
| H | -0.459245 | 1.206591  | 2.270835  |
| O | 0.072196  | -1.423741 | -1.673100 |
| H | -0.866936 | -1.649036 | -1.687543 |
| H | 2.023145  | 0.185219  | -1.231635 |
| H | 2.213493  | 0.871369  | 0.409395  |
| H | 2.150009  | -0.901586 | 0.166265  |

## CPBTS2a

|   |           |           |           |
|---|-----------|-----------|-----------|
| S | -0.007689 | -0.076515 | -0.199865 |
| S | -0.087156 | 0.074623  | 2.162646  |
| C | 1.788720  | -0.037488 | -0.147341 |
| H | -1.424886 | 0.126941  | 2.113006  |
| O | 0.056118  | -1.140851 | -1.568902 |
| H | -0.857659 | -1.289269 | -1.829467 |
| H | 2.133227  | 0.124334  | -1.163953 |
| H | 2.094722  | 0.779714  | 0.496860  |
| H | 2.161343  | -0.985484 | 0.232931  |

## CRBTS2b = CRFTS2a = CRPTS3a = CRPTS3b = CRHTS3a

|   |           |           |           |
|---|-----------|-----------|-----------|
| S | 0.040571  | 0.438615  | -0.149177 |
| S | -0.375763 | -0.129343 | 1.789065  |
| C | 1.799730  | 0.053930  | -0.296912 |
| H | 1.945488  | -1.011614 | -0.151773 |

|   |           |           |           |
|---|-----------|-----------|-----------|
| H | 2.088258  | 0.327053  | -1.310855 |
| H | 2.368670  | 0.636069  | 0.422484  |
| O | -0.334219 | -1.762025 | -0.921303 |
| H | -1.120769 | -1.556783 | -1.442998 |
| H | -0.542930 | -1.430363 | 1.494378  |

#### BTS2b

|   |           |           |           |
|---|-----------|-----------|-----------|
| S | -0.074500 | 0.063988  | -0.074882 |
| S | -0.291914 | 0.146019  | 1.994944  |
| C | 1.710220  | -0.046524 | -0.246972 |
| H | 2.055844  | -1.009714 | 0.095514  |
| H | 1.914638  | 0.055236  | -1.301615 |
| H | 2.172618  | 0.751619  | 0.311451  |
| O | -0.147215 | -1.414891 | -1.645184 |
| H | -1.087321 | -1.582114 | -1.684457 |
| H | -0.045277 | -1.140097 | 2.254508  |

#### CPBTS2b = CPFTS2a

|   |           |           |           |
|---|-----------|-----------|-----------|
| S | 0.130436  | 0.162004  | -0.146581 |
| S | -0.384418 | -0.171772 | 2.037372  |
| H | 0.962833  | 1.131380  | 0.231025  |
| O | -0.075419 | 1.041487  | -1.663076 |
| H | -0.545369 | 0.439994  | -2.248414 |
| C | -0.598336 | 1.549423  | 2.567932  |
| H | 0.297110  | 2.135466  | 2.366577  |
| H | -1.452604 | 1.998545  | 2.067694  |
| H | -0.781782 | 1.542056  | 3.640613  |

#### FTS2b

|   |           |           |           |
|---|-----------|-----------|-----------|
| C | 0.126952  | 0.108900  | -0.067807 |
| S | 0.146570  | 0.229631  | 1.732101  |
| S | 1.954067  | -0.729936 | 2.511924  |
| H | 2.606741  | 0.437675  | 2.625767  |
| O | -0.496418 | -1.493382 | 1.763156  |
| H | -0.945006 | -1.547817 | 2.613406  |
| H | 0.780405  | -0.712594 | -0.348616 |
| H | -0.887380 | -0.096686 | -0.397829 |
| H | 0.496103  | 1.046686  | -0.475011 |

#### CPFTS2b

|   |           |           |           |
|---|-----------|-----------|-----------|
| C | 0.026418  | 0.031569  | -0.038571 |
| S | -0.186589 | 0.221146  | 1.733873  |
| S | 2.506452  | -0.058827 | 2.197821  |
| H | 2.292040  | 0.509054  | 3.393186  |
| O | -0.321621 | -1.349077 | 2.206465  |
| H | 0.584351  | -1.636873 | 2.393966  |
| H | -0.840611 | -0.471437 | -0.458980 |
| H | 0.104184  | 1.038309  | -0.448799 |
| H | 0.937046  | -0.521351 | -0.256502 |

#### FTS2a

|   |           |           |           |
|---|-----------|-----------|-----------|
| C | 0.097948  | -0.044900 | -0.025302 |
| S | 0.248310  | -0.181530 | 1.762898  |
| S | 2.303742  | 0.603625  | 2.104371  |
| H | 2.008847  | 1.911131  | 2.127379  |
| O | -0.266620 | 1.518984  | 2.185658  |
| H | -1.174386 | 1.388439  | 2.482199  |
| H | -0.124696 | 0.988915  | -0.274086 |
| H | 1.031790  | -0.352246 | -0.489063 |
| H | -0.719219 | -0.692358 | -0.338148 |

#### PTS3a

|   |           |           |           |
|---|-----------|-----------|-----------|
| H | -0.047405 | 0.020247  | -0.038651 |
| S | -0.093845 | 0.047886  | 1.440778  |
| S | 1.920377  | 0.024207  | 1.057983  |
| C | 2.278521  | -1.730286 | 0.827862  |
| O | 0.954476  | -0.024975 | -1.082147 |
| H | 1.079018  | 0.864846  | -1.434378 |
| H | 3.309612  | -1.807030 | 0.487192  |
| H | 2.154266  | -2.246177 | 1.776205  |
| H | 1.602792  | -2.124286 | 0.075565  |

CPPTS3a = CPPTS3b = CPHTS3 = CHHTS3b

|   |           |           |           |
|---|-----------|-----------|-----------|
| H | -0.713506 | 0.300795  | -1.633540 |
| S | -0.768441 | 0.854969  | 0.833193  |
| S | 0.641541  | -0.370415 | 1.471364  |
| C | 1.239466  | -1.244117 | -0.004722 |
| O | -0.456628 | -0.114663 | -2.462034 |
| H | -1.016858 | 0.288599  | -3.124621 |
| H | 2.019181  | -1.924509 | 0.333759  |
| H | 0.426266  | -1.799347 | -0.462121 |
| H | 1.642978  | -0.532825 | -0.718896 |

PTS3b

|   |           |           |           |
|---|-----------|-----------|-----------|
| H | -0.024545 | -0.066502 | -0.008191 |
| S | 0.025388  | -0.028318 | 1.464570  |
| S | 2.016377  | -0.036563 | 1.003907  |
| C | 2.390160  | -1.800085 | 0.852569  |
| O | 0.902905  | 0.090195  | -1.106284 |
| H | 1.111529  | -0.664683 | -1.670932 |
| H | 3.386184  | -1.889580 | 0.421829  |
| H | 2.367477  | -2.258289 | 1.837983  |
| H | 1.651648  | -2.268047 | 0.208050  |

HTS3a

|   |           |           |           |
|---|-----------|-----------|-----------|
| H | -0.177620 | -0.023542 | 0.107673  |
| S | -0.111946 | 0.107686  | 1.478335  |
| S | 1.930623  | 0.081668  | 1.684331  |
| C | 2.299523  | -1.689229 | 1.535435  |
| O | -0.087703 | 0.499208  | -1.429925 |
| H | 0.391174  | 1.325132  | -1.259874 |
| H | 3.371443  | -1.795579 | 1.698430  |
| H | 1.757552  | -2.252675 | 2.289589  |
| H | 2.046774  | -2.046947 | 0.540872  |

HTS3b

|   |           |           |           |
|---|-----------|-----------|-----------|
| H | 0.026459  | 0.134588  | -0.013614 |
| S | -0.051312 | 0.174682  | 1.366975  |
| S | 1.951929  | 0.074941  | 1.795024  |
| C | 2.227591  | -1.717251 | 1.864903  |
| O | 0.086226  | -0.745761 | -1.358926 |
| H | -0.432217 | -1.516865 | -1.082954 |
| H | 3.264490  | -1.858407 | 2.167874  |
| H | 1.568751  | -2.176558 | 2.596531  |
| H | 2.073830  | -2.158042 | 0.883199  |

CRTS11a

|   |           |           |           |
|---|-----------|-----------|-----------|
| S | -0.044042 | 0.222402  | -0.079796 |
| S | 0.080267  | -0.351022 | 1.903922  |
| C | 1.683531  | 0.103483  | -0.625221 |
| H | 2.070703  | -0.900303 | -0.477778 |
| H | 1.673955  | 0.336488  | -1.689573 |
| H | 2.303903  | 0.829445  | -0.106018 |
| H | 0.421816  | 0.831659  | 2.441768  |
| O | 3.032101  | -2.184594 | 1.789695  |
| H | 2.185243  | -1.733065 | 1.950074  |

HTS11a

|   |           |           |           |
|---|-----------|-----------|-----------|
| S | -0.008422 | -0.028286 | -0.014051 |
| S | -0.041608 | -0.087819 | 2.053094  |
| C | 1.741663  | -0.011751 | -0.344754 |
| H | 2.245786  | -1.013849 | 0.090941  |
| H | 1.896742  | -0.048610 | -1.421732 |
| H | 2.263902  | 0.822056  | 0.114846  |
| H | 0.091843  | 1.228054  | 2.286342  |
| O | 2.823067  | -2.005475 | 0.760318  |
| H | 2.447107  | -1.788196 | 1.626050  |

CPHTS11a = CPHTS11b

|   |          |           |           |
|---|----------|-----------|-----------|
| S | 0.014386 | -0.200295 | 0.223172  |
| S | 0.044997 | 0.439366  | 2.195024  |
| C | 1.535310 | 0.335033  | -0.378666 |



|   |           |           |           |
|---|-----------|-----------|-----------|
| H | 2.790481  | -1.478551 | 0.557480  |
| H | 1.791784  | 0.006545  | -1.375235 |
| H | 2.059031  | 1.149584  | 0.095013  |
| H | -0.556737 | 1.621535  | 1.991058  |
| O | 3.304452  | -2.230401 | 0.860571  |
| H | 2.647843  | -2.880145 | 1.110833  |

#### HTS11b

|   |           |           |           |
|---|-----------|-----------|-----------|
| S | 0.093401  | -0.188885 | -0.012758 |
| S | 0.116496  | -0.120002 | 2.054466  |
| C | 1.809353  | 0.062404  | -0.424156 |
| H | 2.469062  | -0.891814 | -0.131575 |
| H | 1.894520  | 0.167055  | -1.503967 |
| H | 2.260716  | 0.896124  | 0.106176  |
| H | -0.053636 | 1.204826  | 2.189915  |
| O | 3.155480  | -2.022547 | 0.109213  |
| H | 2.379905  | -2.600931 | 0.142461  |

#### CH3S

|   |           |           |           |
|---|-----------|-----------|-----------|
| C | 0.001682  | 0.006259  | 0.003091  |
| S | -0.001241 | -0.006323 | 1.805332  |
| H | 1.013703  | -0.002943 | -0.392984 |
| H | -0.498956 | -0.910679 | -0.314474 |
| H | -0.557860 | 0.851965  | -0.388134 |

#### CH3SS

|   |           |           |           |
|---|-----------|-----------|-----------|
| C | -0.003308 | -0.002238 | 0.005356  |
| S | -0.018319 | -0.039931 | 1.822469  |
| S | 1.881823  | 0.040149  | 2.342303  |
| H | 0.463050  | 0.917877  | -0.335568 |
| H | -1.039043 | -0.042752 | -0.328640 |
| H | 0.543992  | -0.861766 | -0.371627 |

#### CH3SOH

|   |           |           |           |
|---|-----------|-----------|-----------|
| C | -0.004768 | -0.002716 | 0.011200  |
| S | 0.027295  | -0.017307 | 1.809729  |
| H | 1.037189  | 0.020722  | -0.310113 |
| H | -0.479384 | -0.896152 | -0.388907 |
| H | -0.510353 | 0.889534  | -0.350038 |
| O | -1.610438 | 0.076940  | 2.127949  |
| H | -1.939063 | -0.820937 | 2.208294  |

#### HSOH

|   |           |           |          |
|---|-----------|-----------|----------|
| H | 0.027629  | -0.041344 | 0.004636 |
| S | -0.020391 | 0.030211  | 1.346375 |
| O | 1.623964  | 0.024353  | 1.643785 |
| H | 1.884798  | -0.889097 | 1.774675 |

#### SH

|   |           |           |          |
|---|-----------|-----------|----------|
| S | 0.012212  | -0.020348 | 0.000518 |
| H | -0.105883 | -0.168878 | 1.329469 |

#### CH2SSH

|   |           |           |           |
|---|-----------|-----------|-----------|
| C | 0.001362  | 0.051182  | -0.001796 |
| S | 0.007451  | 0.102186  | 1.715014  |
| H | 0.920251  | 0.079072  | -0.563260 |
| H | -0.961034 | 0.111072  | -0.485470 |
| S | 1.860391  | -0.697710 | 2.205133  |
| H | 2.522866  | 0.465263  | 2.299828  |

## Reactions starting by HSSNH<sub>2</sub> + OH

### BH&HLYP/6-311+G(2df,2p) optimized geometries

#### HSSNH2

|   |          |           |          |
|---|----------|-----------|----------|
| H | 0.068620 | 0.119074  | 0.036732 |
| S | 0.031453 | -0.018263 | 1.371953 |

|   |          |           |          |
|---|----------|-----------|----------|
| S | 2.081833 | -0.027873 | 1.732971 |
| N | 2.577871 | 1.566986  | 1.944436 |
| H | 2.158185 | 2.020346  | 2.741468 |
| H | 2.490088 | 2.135753  | 1.116560 |

#### SSNH2

|   |           |           |           |
|---|-----------|-----------|-----------|
| S | -0.004329 | -0.005380 | -0.001176 |
| S | 0.003513  | 0.005687  | 1.949198  |
| N | 1.569398  | 0.001436  | -0.597687 |
| H | 2.085914  | -0.815297 | -0.327930 |
| H | 2.073504  | 0.830295  | -0.341920 |

#### SNH2

|   |           |           |           |
|---|-----------|-----------|-----------|
| N | -0.004327 | 0.008705  | 0.003367  |
| S | 0.004461  | -0.002240 | 1.627064  |
| H | 0.842808  | -0.003120 | -0.523212 |
| H | -0.857045 | 0.028450  | -0.513887 |

#### HSNH2

|   |           |           |           |
|---|-----------|-----------|-----------|
| S | 0.000553  | -0.000146 | 0.003030  |
| N | -0.019235 | -0.000062 | 1.701910  |
| H | 1.324141  | 0.000162  | -0.164661 |
| H | -0.450787 | -0.823130 | 2.070941  |
| H | -0.451190 | 0.822834  | 2.070854  |

#### OSNH2

|   |          |           |           |
|---|----------|-----------|-----------|
| N | 0.000181 | 0.002059  | -0.001446 |
| S | 0.003820 | -0.058409 | 1.661502  |
| O | 1.376234 | 0.067586  | 2.185044  |
| H | 0.483417 | -0.763240 | -0.435666 |
| H | 0.308525 | 0.881111  | -0.375535 |

#### CRFTS1a = CRBTS1a

|   |           |           |           |
|---|-----------|-----------|-----------|
| H | -1.180796 | 0.279750  | -1.353982 |
| S | -1.138356 | 0.234730  | -0.021408 |
| S | 0.921048  | 0.162344  | 0.245636  |
| N | 1.463064  | 1.720618  | 0.432866  |
| O | -0.811396 | -2.424279 | -0.682850 |
| H | -1.377643 | -2.610945 | 0.069110  |
| H | 1.160621  | 2.195101  | 1.259611  |
| H | 1.423469  | 2.300359  | -0.381036 |

#### FTS1a

|   |           |           |          |
|---|-----------|-----------|----------|
| H | -0.235094 | 0.044954  | 0.250922 |
| S | 0.061825  | -0.076173 | 1.549904 |
| S | 2.259485  | -0.023823 | 1.842076 |
| N | 2.555331  | 1.571225  | 2.122651 |
| O | 0.454372  | -1.816613 | 1.214865 |
| H | -0.119492 | -2.315396 | 1.789996 |
| H | 2.233760  | 1.964305  | 2.982531 |
| H | 2.513694  | 2.199078  | 1.347193 |

#### CPFTS1a

|   |           |           |           |
|---|-----------|-----------|-----------|
| H | -2.549259 | -0.104318 | 0.358368  |
| S | -1.851734 | -0.066131 | -0.782886 |
| S | 1.666216  | -0.088862 | 0.827179  |
| N | 1.112197  | 1.380136  | 0.424264  |
| O | -0.992950 | -1.451705 | -0.620133 |
| H | -0.172360 | -1.250631 | -0.160621 |
| H | 0.211281  | 1.487378  | -0.000146 |
| H | 1.649311  | 2.201759  | 0.604005  |

#### CRFTS1b = CRBTS1b

|   |           |           |           |
|---|-----------|-----------|-----------|
| H | -0.868969 | -0.756721 | -1.623304 |
| S | -0.836952 | -1.087715 | -0.330122 |
| S | 1.130104  | -0.671619 | 0.059749  |
| N | 1.136847  | 0.972096  | 0.484783  |
| O | -1.512920 | 2.389051  | 0.134942  |
| H | -0.718636 | 1.851740  | 0.274841  |
| H | 1.410370  | 1.115337  | 1.438182  |
| H | 1.699139  | 1.519764  | -0.138492 |

FTS1b

|   |           |           |          |
|---|-----------|-----------|----------|
| H | -0.114456 | 0.099293  | 0.033533 |
| S | -0.079717 | -0.108291 | 1.353636 |
| S | 2.024510  | -0.039415 | 1.851542 |
| N | 2.491091  | 1.549202  | 2.155748 |
| O | -0.306298 | 1.646632  | 1.678239 |
| H | 0.561878  | 2.044255  | 1.791422 |
| H | 2.717784  | 1.751719  | 3.109511 |
| H | 3.142268  | 1.933934  | 1.500759 |

CPFTS1b = CPBTS1a

|   |           |           |           |
|---|-----------|-----------|-----------|
| H | -1.636403 | -0.997340 | -0.512642 |
| S | -1.844998 | 0.250059  | -0.077242 |
| S | 2.445420  | -0.140657 | -0.027372 |
| N | 1.422676  | 0.933482  | 0.656252  |
| O | -1.050099 | 1.073319  | -1.255914 |
| H | -0.131507 | 1.156203  | -1.006135 |
| H | 0.578320  | 0.614594  | 1.093177  |
| H | 1.761274  | 1.826101  | 0.951559  |

BTS1b

|   |           |           |           |
|---|-----------|-----------|-----------|
| S | -0.012054 | 0.035611  | 0.010108  |
| N | -0.103411 | -0.013887 | 1.668840  |
| S | 2.042858  | 0.021344  | -0.445863 |
| H | 2.280431  | -1.244489 | -0.128069 |
| H | -0.450087 | 0.808895  | 2.114443  |
| H | -0.426666 | -0.869320 | 2.068377  |
| O | 4.017908  | 0.274446  | 0.210000  |
| H | 4.105146  | 1.226279  | 0.220003  |

BTS1a

|   |           |           |           |
|---|-----------|-----------|-----------|
| S | -0.100589 | -0.237476 | -0.038046 |
| N | -0.258949 | 0.054745  | 1.588569  |
| S | 1.997862  | -0.245162 | -0.439096 |
| H | 2.092380  | -1.544512 | -0.683332 |
| H | -0.072834 | 0.989469  | 1.890741  |
| H | 0.119850  | -0.637761 | 2.202607  |
| O | 3.532272  | -0.128309 | -1.798190 |
| H | 3.585784  | 0.807551  | -1.983202 |

CRFTS2a

|   |           |           |           |
|---|-----------|-----------|-----------|
| N | -0.656558 | 0.540835  | -1.536836 |
| S | -0.615901 | 0.546283  | 0.114330  |
| S | 1.313538  | 0.148003  | 0.752993  |
| H | 1.716786  | 1.415552  | 0.869464  |
| O | -0.768069 | -1.876609 | -0.213009 |
| H | -1.507091 | -2.026059 | 0.376882  |
| H | -0.498340 | -0.364793 | -1.935712 |
| H | -0.153257 | 1.278945  | -1.986348 |

FTS2a

|   |           |           |           |
|---|-----------|-----------|-----------|
| N | -0.037038 | 0.171527  | -0.113192 |
| S | 0.073461  | 0.099605  | 1.543963  |
| S | 2.066349  | -0.221964 | 2.361367  |
| H | 2.248911  | 1.072069  | 2.624711  |
| O | 0.051330  | -1.660944 | 1.327678  |
| H | -0.253764 | -2.013337 | 2.159405  |
| H | -0.565681 | -0.557667 | -0.551109 |
| H | -0.191727 | 1.096665  | -0.455526 |

CPFTS2a

|   |           |           |           |
|---|-----------|-----------|-----------|
| N | -0.653377 | 0.655678  | -1.601767 |
| S | -1.045034 | 0.222148  | -0.083504 |
| S | 1.613374  | 0.319239  | 0.647632  |
| H | 1.243134  | 0.823792  | 1.822055  |
| O | -0.921513 | -1.396405 | 0.023782  |
| H | -0.026488 | -1.610387 | 0.294060  |
| H | -1.298276 | 0.424219  | -2.329465 |
| H | 0.312348  | 0.638604  | -1.863061 |

CRFTS2b

|   |           |           |           |
|---|-----------|-----------|-----------|
| N | -0.763221 | -0.318859 | -1.547821 |
| S | -0.531535 | -0.613602 | 0.061817  |
| S | 1.432055  | -0.205853 | 0.559770  |
| H | 1.272400  | 1.105709  | 0.751522  |
| O | -1.032493 | 1.751321  | 0.260377  |
| H | -1.812347 | 1.677919  | 0.810247  |
| H | -0.729504 | 0.654877  | -1.781868 |
| H | -0.246331 | -0.906384 | -2.171171 |

FTS2b

|   |           |           |           |
|---|-----------|-----------|-----------|
| N | -0.202644 | 0.061779  | -0.063605 |
| S | 0.188973  | -0.103179 | 1.548226  |
| S | 2.289915  | 0.207650  | 2.233007  |
| H | 2.317805  | 1.538493  | 2.261239  |
| O | -0.064639 | 1.635216  | 1.719082  |
| H | -0.475558 | 1.750995  | 2.571449  |
| H | -0.361182 | 1.008723  | -0.352651 |
| H | 0.429257  | -0.430806 | -0.663817 |

CPFTS2b = CPBTS2a = CPBTS2b

|   |           |           |           |
|---|-----------|-----------|-----------|
| N | -0.628054 | -0.443333 | -1.572186 |
| S | -1.022992 | -0.290811 | -0.005393 |
| S | 1.828344  | -0.240429 | 0.552481  |
| H | 1.479034  | 0.962354  | 1.007849  |
| O | -1.114054 | 1.323233  | 0.320593  |
| H | -2.010662 | 1.625232  | 0.211055  |
| H | -1.329572 | -0.298059 | -2.268125 |
| H | 0.308849  | -0.203225 | -1.831936 |

CRBTS2a

|   |           |           |           |
|---|-----------|-----------|-----------|
| S | -0.025514 | 0.442252  | 0.183003  |
| N | 0.015756  | 0.141581  | 1.804379  |
| S | 1.726454  | -0.305741 | -0.594603 |
| H | 1.311255  | -1.570194 | -0.699784 |
| H | 0.059599  | 0.940293  | 2.400142  |
| H | -0.580164 | -0.606342 | 2.096751  |
| O | -1.113566 | -1.686797 | 0.128259  |
| H | -1.769674 | -1.482058 | -0.537326 |

BTS2a

|   |           |           |           |
|---|-----------|-----------|-----------|
| S | 0.000000  | 0.000000  | 0.000000  |
| N | 0.000000  | 0.000000  | 1.661983  |
| S | 2.026965  | 0.000000  | -0.567617 |
| H | 2.300946  | -1.252144 | -0.225804 |
| H | -0.334474 | 0.831191  | 2.101260  |
| H | -0.287790 | -0.847172 | 2.103987  |
| O | -1.707779 | -1.099877 | 0.518460  |
| H | -2.026285 | -1.389325 | -0.335045 |

CRBTS2b

|   |           |           |           |
|---|-----------|-----------|-----------|
| S | 0.108381  | -0.196457 | 0.231670  |
| N | -0.196433 | 0.130213  | 1.817062  |
| S | 2.146750  | -0.001020 | -0.023715 |
| H | 2.474189  | -1.275906 | 0.198212  |
| H | -0.577191 | 1.037481  | 1.992691  |
| H | -0.540382 | -0.622639 | 2.372711  |
| O | -0.173885 | 2.215934  | 0.054834  |
| H | -0.509243 | 2.229470  | -0.841524 |

BT2b

|   |           |           |           |
|---|-----------|-----------|-----------|
| S | 0.284538  | 0.166920  | 0.156122  |
| N | 0.004199  | 0.215923  | 1.797065  |
| S | 2.347743  | -0.327580 | 0.151689  |
| H | 2.207035  | -1.329470 | -0.716268 |
| H | -0.421325 | 1.093102  | 2.032670  |
| H | -0.542025 | -0.562024 | 2.111852  |
| O | -0.902497 | 1.860865  | 0.037296  |
| H | -0.652842 | 2.261455  | -0.792284 |

RHTS3b

|   |           |           |           |
|---|-----------|-----------|-----------|
| S | -0.461678 | -0.109815 | -0.605150 |
| S | -0.204419 | -1.343089 | 1.032505  |
| N | 0.995829  | 0.132719  | -1.346218 |
| H | 1.417488  | -0.683512 | -1.742380 |
| H | 1.625373  | 0.697447  | -0.808808 |
| H | 0.150231  | -0.384660 | 1.891587  |
| O | 0.252216  | 1.771434  | 0.751665  |
| H | -0.456859 | 2.373383  | 0.526250  |

#### HTS3b

|   |           |           |           |
|---|-----------|-----------|-----------|
| S | -0.056193 | 0.205981  | 0.118106  |
| S | -0.030799 | -0.183169 | 2.130961  |
| N | 1.506426  | 0.158712  | -0.452885 |
| H | 1.957311  | -0.732337 | -0.385918 |
| H | 2.094819  | 0.904818  | -0.138495 |
| H | 0.286177  | 1.073368  | 2.608309  |
| O | 0.127036  | 2.533853  | 3.157082  |
| H | -0.811712 | 2.676635  | 3.012851  |

#### CPHTS3b

|   |           |           |           |
|---|-----------|-----------|-----------|
| S | -0.276117 | -0.685438 | -1.084474 |
| S | -0.621391 | -1.192097 | 0.772700  |
| N | 0.949730  | 0.448610  | -1.183921 |
| H | 1.855539  | 0.040358  | -1.043321 |
| H | 0.815328  | 1.226464  | -0.556577 |
| H | 0.151109  | 1.185352  | 1.659964  |
| O | 0.491172  | 2.010956  | 1.323799  |
| H | -0.020324 | 2.701756  | 1.726920  |

#### CRHTS3a

|   |           |           |           |
|---|-----------|-----------|-----------|
| S | -0.133915 | -1.017645 | -0.744323 |
| S | -0.453470 | -0.305348 | 1.184283  |
| N | 0.975673  | -0.029802 | -1.485595 |
| H | 1.904274  | -0.097466 | -1.118546 |
| H | 0.688501  | 0.925197  | -1.581732 |
| H | -1.478564 | 0.510459  | 0.933041  |
| O | 0.253672  | 2.392685  | 0.406169  |
| H | 0.832377  | 2.301146  | 1.167102  |

#### HTS3a

|   |           |           |           |
|---|-----------|-----------|-----------|
| S | 0.047775  | -0.408256 | 0.060490  |
| S | 0.129664  | 0.194656  | 2.017192  |
| N | 1.559935  | -0.244360 | -0.614597 |
| H | 2.271887  | -0.826141 | -0.219630 |
| H | 1.866319  | 0.699826  | -0.742204 |
| H | -0.172586 | 1.536200  | 1.856359  |
| O | 0.072047  | 3.071813  | 1.724302  |
| H | 0.895269  | 3.178206  | 2.207071  |

#### CPHTS3a

|   |           |           |           |
|---|-----------|-----------|-----------|
| S | -0.063354 | -1.189571 | -0.605878 |
| S | -0.382082 | -0.841928 | 1.292077  |
| N | 0.982829  | -0.059935 | -1.260056 |
| H | 1.935027  | -0.224121 | -0.989276 |
| H | 0.716778  | 0.889168  | -1.047440 |
| H | -0.412527 | 3.100149  | 0.328824  |
| O | 0.214816  | 2.389708  | 0.273249  |
| H | -0.006392 | 1.773125  | 0.966797  |

#### CROTS3a

|   |           |           |           |
|---|-----------|-----------|-----------|
| H | -1.697984 | 0.146890  | -0.726519 |
| S | -1.437653 | 0.217551  | 0.580984  |
| S | 0.610174  | 0.294241  | 0.398228  |
| N | 1.123164  | -1.264901 | 0.231165  |
| O | 0.530539  | 0.201568  | -1.991715 |
| H | 0.861400  | 1.081915  | -2.167720 |
| H | 1.398522  | -1.507387 | -0.699103 |
| H | 1.684202  | -1.625419 | 0.972890  |

#### PTS3a

|   |          |           |           |
|---|----------|-----------|-----------|
| H | 0.062642 | -0.021943 | -0.141258 |
|---|----------|-----------|-----------|

|   |           |           |           |
|---|-----------|-----------|-----------|
| S | -0.284547 | -0.055562 | 1.284029  |
| S | 1.732811  | -0.008169 | 1.385972  |
| N | 2.239125  | -1.582764 | 1.200602  |
| O | 1.282868  | -0.046323 | -0.924227 |
| H | 1.498541  | 0.775628  | -1.357592 |
| H | 2.224987  | -1.859722 | 0.234487  |
| H | 3.132049  | -1.731481 | 1.631209  |

#### CPPTS3a

|   |           |           |           |
|---|-----------|-----------|-----------|
| H | -0.490867 | 0.281420  | -1.937366 |
| S | -1.233009 | 0.487153  | 0.525033  |
| S | 0.408600  | -0.194213 | 1.282821  |
| N | 1.155381  | -1.152857 | 0.129463  |
| O | 0.253986  | -0.011978 | -2.458818 |
| H | 0.490419  | 0.712085  | -3.025568 |
| H | 1.053921  | -0.817885 | -0.818514 |
| H | 2.113499  | -1.321248 | 0.376035  |

#### CRHTS5a

|   |           |           |           |
|---|-----------|-----------|-----------|
| H | -1.775108 | 0.950203  | -1.537154 |
| S | -1.475020 | 1.213740  | -0.260113 |
| O | 0.090814  | 1.660851  | -0.438891 |
| H | 0.642842  | 0.876847  | -0.364171 |
| S | 1.415159  | -1.338058 | 0.071739  |
| N | -0.017454 | -1.859794 | 0.622181  |
| H | -0.122449 | -2.777801 | 0.999171  |
| H | -0.825935 | -1.269971 | 0.581026  |

#### HTS5a

|   |           |           |          |
|---|-----------|-----------|----------|
| H | -0.264975 | -0.779272 | 0.534139 |
| S | 0.202731  | -0.127594 | 1.614884 |
| O | 1.700573  | 0.038476  | 1.262368 |
| H | 2.392191  | -0.949309 | 1.604949 |
| S | 2.885694  | -2.315544 | 2.109815 |
| N | 1.345521  | -2.893615 | 2.404649 |
| H | 1.027409  | -3.639377 | 1.821201 |
| H | 1.077892  | -2.992135 | 3.361794 |

#### CPHTS5a = CPHTS5b

|   |           |           |           |
|---|-----------|-----------|-----------|
| N | -0.737510 | -1.439322 | 1.178577  |
| S | -0.124463 | -2.214975 | -0.223667 |
| H | -1.707369 | -1.655601 | 1.304886  |
| H | -0.225243 | -1.724324 | 1.990805  |
| H | 0.232495  | -1.112729 | -0.884516 |
| O | 0.465103  | 1.242717  | -1.137474 |
| S | -0.063842 | 1.950790  | 0.070016  |
| H | -0.480240 | 0.932056  | 0.861832  |

#### CRHTS5b

|   |           |           |           |
|---|-----------|-----------|-----------|
| N | -0.983841 | -2.097560 | 0.800773  |
| S | 0.628944  | -2.175960 | 0.655465  |
| H | -1.523645 | -2.905586 | 1.026384  |
| H | -1.466622 | -1.229008 | 0.679588  |
| H | 0.254238  | 0.196995  | 0.267559  |
| O | -0.507681 | 0.780483  | 0.280807  |
| S | -0.324425 | 1.965700  | -0.849587 |
| H | 0.247002  | 2.891464  | -0.072979 |

#### HTS5b

|   |          |           |          |
|---|----------|-----------|----------|
| N | 1.367254 | -2.995386 | 2.482440 |
| S | 2.747785 | -2.221444 | 1.997615 |
| H | 1.052167 | -3.771509 | 1.941782 |
| H | 1.178687 | -3.051392 | 3.459799 |
| H | 2.159469 | -0.931968 | 1.461479 |
| O | 1.697385 | 0.167909  | 1.017828 |
| S | 2.782969 | 1.231757  | 0.678648 |
| H | 2.920543 | 1.857160  | 1.861903 |

#### CRHTS6a 0 CRHTS6b

|   |           |          |           |
|---|-----------|----------|-----------|
| H | -1.039679 | 1.456280 | -1.192823 |
| O | -1.269090 | 1.017446 | -0.380402 |

|   |           |           |           |
|---|-----------|-----------|-----------|
| S | -0.323281 | 1.624739  | 0.842132  |
| H | 0.702418  | 0.775843  | 0.709874  |
| S | 1.018747  | -1.848043 | -0.598151 |
| N | -0.601109 | -1.908306 | -0.539364 |
| H | -1.085340 | -2.780104 | -0.563965 |
| H | -1.142354 | -1.069048 | -0.459776 |

#### HTS6a

|   |           |           |           |
|---|-----------|-----------|-----------|
| H | -0.201416 | -0.433040 | 0.327804  |
| O | 0.122909  | -0.046990 | 1.135876  |
| S | 1.731647  | 0.200628  | 0.998714  |
| H | 2.165301  | -1.330980 | 1.355847  |
| S | 2.129082  | -2.868985 | 1.533697  |
| N | 0.796272  | -3.165984 | 0.591752  |
| H | 0.954985  | -3.639997 | -0.272538 |
| H | -0.030686 | -3.452309 | 1.072408  |

#### CPHTS6a

|   |           |           |           |
|---|-----------|-----------|-----------|
| H | -1.074022 | 0.275404  | -0.484538 |
| O | -1.251446 | 1.231932  | -0.525798 |
| S | 0.004610  | 2.046842  | 0.053700  |
| H | 1.219286  | -0.592793 | 0.487003  |
| S | 0.860508  | -1.860688 | 0.281091  |
| N | -0.691953 | -1.521609 | -0.385782 |
| H | -0.754389 | -1.885191 | -1.318463 |
| H | -1.408733 | -1.942223 | 0.175728  |

#### HTS6b

|   |           |           |           |
|---|-----------|-----------|-----------|
| N | 0.232895  | 0.123766  | 0.370619  |
| S | -0.660357 | -0.290918 | 1.691993  |
| H | 0.948056  | 0.808641  | 0.506459  |
| H | -0.254346 | 0.216711  | -0.496565 |
| H | -1.434299 | 1.008877  | 1.942592  |
| S | -1.805232 | 2.621635  | 2.009260  |
| O | -0.247894 | 3.128852  | 1.911004  |
| H | 0.104835  | 3.227310  | 2.789813  |

#### CPHTS6b

|   |           |           |           |
|---|-----------|-----------|-----------|
| N | 1.228843  | -1.241774 | -1.411301 |
| S | 0.481328  | -1.171161 | 0.093095  |
| H | 1.009228  | -0.484520 | -2.026039 |
| H | 1.149919  | -2.128781 | -1.865604 |
| H | -0.823380 | -1.250416 | -0.208710 |
| S | -1.197464 | 2.219716  | 1.263749  |
| O | 0.313157  | 2.029674  | 0.744292  |
| H | 0.478528  | 1.094911  | 0.567962  |

#### CRHTS8a = CRHTS8b

|   |           |           |           |
|---|-----------|-----------|-----------|
| N | -1.154342 | 0.687651  | -1.252827 |
| S | -0.733064 | 0.712865  | 0.318150  |
| O | 0.685687  | 1.499264  | 0.444395  |
| H | 1.392139  | 0.855856  | 0.362022  |
| S | 0.747573  | -1.590357 | -0.023831 |
| H | 0.341614  | -1.994860 | 1.177110  |
| H | -0.668478 | 0.059529  | -1.861563 |
| H | -1.442965 | 1.549769  | -1.668114 |

#### HTS8a

|   |           |           |           |
|---|-----------|-----------|-----------|
| N | 0.232895  | 0.123766  | 0.370619  |
| S | -0.660357 | -0.290918 | 1.691993  |
| H | 0.948056  | 0.808641  | 0.506459  |
| H | -0.254346 | 0.216711  | -0.496565 |
| H | -1.434299 | 1.008877  | 1.942592  |
| S | -1.805232 | 2.621635  | 2.009260  |
| O | -0.247894 | 3.128852  | 1.911004  |
| H | 0.104835  | 3.227310  | 2.789813  |

#### CPHTS8a

|   |           |          |           |
|---|-----------|----------|-----------|
| N | -1.175719 | 0.729190 | -1.268911 |
| S | -1.052828 | 1.581524 | 0.148652  |
| O | 0.339308  | 1.576236 | 0.642611  |

|   |           |           |           |
|---|-----------|-----------|-----------|
| H | 1.361931  | -0.632965 | 0.448778  |
| S | 1.230119  | -1.834782 | -0.114184 |
| H | 0.667541  | -2.369569 | 0.967059  |
| H | -0.820707 | -0.210528 | -1.201758 |
| H | -0.791936 | 1.205806  | -2.064710 |

#### HTS8b

|   |           |           |           |
|---|-----------|-----------|-----------|
| S | 0.061257  | 0.006055  | -0.008662 |
| N | 0.003876  | -0.092029 | 1.624719  |
| H | 0.882249  | -0.082324 | 2.105919  |
| H | -0.703256 | 0.455491  | 2.077106  |
| O | 0.757790  | 1.357754  | -0.387167 |
| H | 0.091183  | 2.215349  | -0.407890 |
| S | -1.034033 | 3.514474  | -0.385804 |
| H | -0.248800 | 4.316881  | 0.333200  |

#### CPHTS8b

|   |           |           |           |
|---|-----------|-----------|-----------|
| S | 0.564578  | -1.732350 | -0.028561 |
| N | 0.086035  | -1.160261 | 1.453410  |
| H | 0.840946  | -1.037284 | 2.103544  |
| H | -0.482592 | -0.331395 | 1.395724  |
| O | 1.259618  | -0.678379 | -0.795423 |
| H | 0.050366  | 1.460834  | -0.661674 |
| S | -0.983405 | 2.059076  | -0.068255 |
| H | -0.206327 | 2.879761  | 0.634866  |

### QCISD/6-311+G(2df,2p) optimized geometries

#### HSSNH2

|   |          |           |          |
|---|----------|-----------|----------|
| H | 0.068620 | 0.119074  | 0.036732 |
| S | 0.031453 | -0.018263 | 1.371953 |
| S | 2.081833 | -0.027873 | 1.732971 |
| N | 2.577871 | 1.566986  | 1.944436 |
| H | 2.158185 | 2.020346  | 2.741468 |
| H | 2.490088 | 2.135753  | 1.116560 |

#### SNH2

|   |           |           |           |
|---|-----------|-----------|-----------|
| N | -0.004318 | 0.004182  | 0.000812  |
| S | 0.004395  | -0.001209 | 1.638192  |
| H | 0.848875  | -0.001481 | -0.527679 |
| H | -0.863056 | 0.030304  | -0.517992 |

#### OHSNH2

|   |           |           |           |
|---|-----------|-----------|-----------|
| S | -0.003462 | 0.027126  | -0.032400 |
| O | -0.001224 | -0.013861 | 1.642741  |
| H | 0.913469  | -0.007457 | 1.933837  |
| N | -0.003648 | -1.546055 | -0.535766 |
| H | 0.845531  | -2.071904 | -0.411589 |
| H | -0.835764 | -2.079144 | -0.343343 |

#### SSNH2

|   |           |           |           |
|---|-----------|-----------|-----------|
| S | -0.015905 | -0.005924 | -0.012256 |
| S | 0.015783  | 0.006323  | 1.955490  |
| N | 1.573762  | 0.001323  | -0.623067 |
| H | 2.083438  | -0.815776 | -0.313482 |
| H | 2.070923  | 0.830795  | -0.326200 |

#### CRFTS1a = CRBTS1a

|   |           |           |           |
|---|-----------|-----------|-----------|
| S | 0.180856  | 0.160244  | -0.047741 |
| N | -0.484654 | -0.183361 | 1.457783  |
| S | 2.237453  | 0.389799  | 0.203646  |
| H | 2.604908  | -0.890393 | 0.030862  |
| H | -0.372017 | 0.555839  | 2.134367  |
| H | -0.203051 | -1.073540 | 1.838537  |
| O | 3.544159  | -0.586254 | -2.409510 |
| H | 3.302625  | 0.337138  | -2.574587 |

#### FTS1a



|   |           |           |          |
|---|-----------|-----------|----------|
| H | -0.226738 | 0.064973  | 0.260466 |
| S | 0.081973  | -0.075457 | 1.563665 |
| S | 2.294489  | -0.043385 | 1.848348 |
| N | 2.585227  | 1.575127  | 2.124967 |
| O | 0.465946  | -1.817883 | 1.216064 |
| H | -0.144582 | -2.301031 | 1.781779 |
| H | 2.196172  | 1.957902  | 2.971065 |
| H | 2.471392  | 2.187311  | 1.333784 |

CPFTS1a

|   |           |           |           |
|---|-----------|-----------|-----------|
| H | -2.549928 | -0.118559 | 0.380703  |
| S | -1.843341 | -0.071780 | -0.764166 |
| S | 1.645305  | -0.069940 | 0.892092  |
| N | 1.102556  | 1.383070  | 0.375237  |
| O | -0.963648 | -1.466840 | -0.588969 |
| H | -0.154871 | -1.231724 | -0.109899 |
| H | 0.196470  | 1.465100  | -0.057649 |
| H | 1.640158  | 2.218298  | 0.522679  |

CRFTS1b = CRBTS1b

|   |           |           |           |
|---|-----------|-----------|-----------|
| S | -0.009419 | -0.291961 | 0.153285  |
| N | 0.750710  | 0.313719  | 1.569749  |
| S | 1.485894  | -0.215703 | -1.261908 |
| H | 2.043892  | -1.413713 | -1.023106 |
| H | 0.321200  | 1.178186  | 1.867846  |
| H | 0.709198  | -0.368019 | 2.314489  |
| O | 3.765363  | 0.628804  | 1.319035  |
| H | 2.790949  | 0.581673  | 1.315692  |

FTS1b

|   |           |           |          |
|---|-----------|-----------|----------|
| H | -0.105578 | 0.098091  | 0.017114 |
| S | -0.100223 | -0.110392 | 1.345548 |
| S | 2.020113  | -0.043619 | 1.860615 |
| N | 2.470530  | 1.578181  | 2.149408 |
| O | -0.313645 | 1.650377  | 1.697546 |
| H | 0.580871  | 2.019089  | 1.797003 |
| H | 2.726382  | 1.760158  | 3.108617 |
| H | 3.158609  | 1.925442  | 1.498540 |

CPFTS1b = CPBTS1b = CPBTS1a

|   |           |           |           |
|---|-----------|-----------|-----------|
| H | -1.506067 | -1.017489 | -0.608548 |
| S | -1.808887 | 0.112858  | 0.055997  |
| S | 2.329351  | -0.077147 | -0.413087 |
| N | 1.437881  | 0.912068  | 0.562233  |
| O | -1.189698 | 1.215856  | -1.023550 |
| H | -0.258461 | 1.331145  | -0.803369 |
| H | 0.663020  | 0.520875  | 1.077258  |
| H | 1.877543  | 1.717597  | 0.974749  |

BTS1**b**

|   |           |           |           |
|---|-----------|-----------|-----------|
| S | -0.037967 | -0.047183 | 0.000819  |
| N | 0.001188  | 0.023558  | 1.691104  |
| S | 1.980431  | -0.007372 | -0.551374 |
| H | 2.270700  | -1.279375 | -0.261251 |
| H | -0.429572 | 0.856358  | 2.058928  |
| H | -0.353841 | -0.810872 | 2.129496  |
| O | 4.030432  | 0.275140  | 0.249070  |
| H | 3.992755  | 1.228626  | 0.401046  |

BTS1**a**

|   |           |           |           |
|---|-----------|-----------|-----------|
| S | -0.089400 | -0.159325 | -0.068480 |
| N | -0.308054 | 0.044279  | 1.586628  |
| S | 2.012548  | -0.183993 | -0.383858 |
| H | 2.132854  | -1.502739 | -0.554213 |
| H | -0.025952 | 0.946277  | 1.937632  |
| H | 0.057688  | -0.706243 | 2.151820  |
| O | 3.558130  | -0.159876 | -1.854004 |
| H | 3.557962  | 0.780166  | -2.075473 |

CRFTS2a

|   |           |          |           |
|---|-----------|----------|-----------|
| N | -0.691599 | 0.529713 | -1.547245 |
|---|-----------|----------|-----------|

|   |           |           |           |
|---|-----------|-----------|-----------|
| S | -0.637020 | 0.504832  | 0.119896  |
| S | 1.309798  | 0.104785  | 0.734142  |
| H | 1.683216  | 1.388880  | 0.867351  |
| O | -0.712135 | -1.788068 | -0.191855 |
| H | -1.486125 | -1.963841 | 0.357783  |
| H | -0.488805 | -0.382264 | -1.933372 |
| H | -0.146222 | 1.268120  | -1.964936 |

#### FTS2a

|   |           |           |           |
|---|-----------|-----------|-----------|
| N | -0.004141 | 0.155713  | -0.160399 |
| S | 0.084266  | 0.102433  | 1.528077  |
| S | 2.069257  | -0.239774 | 2.387424  |
| H | 2.238142  | 1.063318  | 2.659463  |
| O | 0.050911  | -1.659439 | 1.315555  |
| H | -0.211008 | -1.991227 | 2.180406  |
| H | -0.629124 | -0.539602 | -0.544594 |
| H | -0.206462 | 1.094532  | -0.468636 |

#### CPFTS2a

|   |           |           |           |
|---|-----------|-----------|-----------|
| N | -0.647828 | 0.690570  | -1.594573 |
| S | -1.056957 | 0.232290  | -0.069098 |
| S | 1.597697  | 0.295800  | 0.628079  |
| H | 1.233704  | 0.822112  | 1.804792  |
| O | -0.930443 | -1.407386 | 0.017401  |
| H | -0.020795 | -1.594271 | 0.289218  |
| H | -1.279620 | 0.410029  | -2.326941 |
| H | 0.328411  | 0.627744  | -1.839147 |

#### CRFTS2b

|   |           |           |           |
|---|-----------|-----------|-----------|
| N | -0.795972 | -0.305696 | -1.550322 |
| S | -0.562638 | -0.580666 | 0.079707  |
| S | 1.419028  | -0.196177 | 0.562573  |
| H | 1.246625  | 1.126061  | 0.729878  |
| O | -0.986474 | 1.685511  | 0.249215  |
| H | -1.784034 | 1.637657  | 0.790965  |
| H | -0.710246 | 0.676492  | -1.773187 |
| H | -0.237266 | -0.898054 | -2.145956 |

#### FTS2b

|   |           |           |           |
|---|-----------|-----------|-----------|
| N | -0.228990 | 0.050430  | -0.079796 |
| S | 0.185646  | -0.111112 | 1.552173  |
| S | 2.285513  | 0.206597  | 2.286412  |
| H | 2.304215  | 1.544646  | 2.222991  |
| O | -0.065763 | 1.633609  | 1.707082  |
| H | -0.442087 | 1.742043  | 2.585854  |
| H | -0.363896 | 1.014684  | -0.351812 |
| H | 0.447290  | -0.412024 | -0.669974 |

#### CPFTS2b = CPBTS2a = CPBTS2b

|   |           |           |           |
|---|-----------|-----------|-----------|
| S | -0.522591 | 0.383556  | 0.258877  |
| N | -0.175579 | 0.335308  | 1.863309  |
| S | 2.376382  | -0.345883 | -0.110319 |
| H | 1.711190  | -1.395464 | -0.617329 |
| H | -0.937225 | 0.194363  | 2.505571  |
| H | 0.684779  | -0.128511 | 2.112517  |
| O | -0.862054 | -1.185493 | -0.212827 |
| H | -1.810741 | -1.318369 | -0.143868 |

#### CRBTS2a

|   |           |           |           |
|---|-----------|-----------|-----------|
| S | -0.045256 | 0.421356  | 0.182117  |
| N | 0.066562  | 0.110419  | 1.826336  |
| S | 1.700215  | -0.321642 | -0.627078 |
| H | 1.262541  | -1.590824 | -0.687676 |
| H | -0.013138 | 0.946820  | 2.382265  |
| H | -0.581491 | -0.618774 | 2.089346  |
| O | -1.053653 | -1.628591 | 0.148831  |
| H | -1.711634 | -1.445771 | -0.533319 |

#### BTS2a

|   |           |          |          |
|---|-----------|----------|----------|
| S | -0.072355 | 0.149775 | 0.119290 |
| N | 0.128937  | 0.059808 | 1.791904 |

|   |           |           |           |
|---|-----------|-----------|-----------|
| S | 1.896793  | -0.043078 | -0.574967 |
| H | 2.019057  | -1.354687 | -0.313293 |
| H | -0.149497 | 0.927253  | 2.227310  |
| H | -0.437175 | -0.705930 | 2.134559  |
| O | -1.633531 | -1.242553 | 0.387663  |
| H | -1.780646 | -1.547915 | -0.515242 |

#### CRBTS2b

|   |           |           |           |
|---|-----------|-----------|-----------|
| S | 0.090399  | -0.169850 | 0.242219  |
| N | -0.152225 | 0.148182  | 1.869965  |
| S | 2.121947  | 0.067927  | -0.053905 |
| H | 2.454829  | -1.217740 | 0.148706  |
| H | -0.585677 | 1.052265  | 1.994282  |
| H | -0.628814 | -0.603572 | 2.341551  |
| O | -0.111874 | 2.101075  | 0.080008  |
| H | -0.456399 | 2.138789  | -0.820885 |

#### BTS2b

|   |           |           |           |
|---|-----------|-----------|-----------|
| S | 0.277242  | 0.190008  | 0.116907  |
| N | 0.029964  | 0.182756  | 1.785058  |
| S | 2.356246  | -0.219719 | 0.015847  |
| H | 2.207557  | -1.436715 | -0.530219 |
| H | -0.382742 | 1.070055  | 2.042291  |
| H | -0.580662 | -0.577895 | 2.046522  |
| O | -0.908164 | 1.889765  | 0.075860  |
| H | -0.674616 | 2.280935  | -0.774124 |

#### CRHTS3a

|   |           |           |           |
|---|-----------|-----------|-----------|
| S | -0.175335 | -0.994061 | -0.790826 |
| S | -0.449449 | -0.366956 | 1.185431  |
| N | 1.002065  | -0.015784 | -1.481648 |
| H | 1.917032  | -0.149078 | -1.078304 |
| H | 0.754750  | 0.963263  | -1.486442 |
| H | -1.431107 | 0.523066  | 0.968354  |
| O | 0.189299  | 2.408386  | 0.341525  |
| H | 0.781292  | 2.310390  | 1.102308  |

#### HTS3a

|   |           |           |           |
|---|-----------|-----------|-----------|
| S | 0.019638  | -0.432375 | 0.097942  |
| S | 0.055648  | 0.146150  | 2.081161  |
| N | 1.531867  | -0.094886 | -0.557802 |
| H | 2.285170  | -0.610788 | -0.128411 |
| H | 1.733624  | 0.894412  | -0.579017 |
| H | -0.285687 | 1.482842  | 1.894575  |
| O | 0.297788  | 2.867623  | 1.426641  |
| H | 1.032261  | 2.948966  | 2.053894  |

#### CPHTS3a

|   |           |           |           |
|---|-----------|-----------|-----------|
| S | -0.299642 | -0.668198 | -1.090556 |
| S | -0.602420 | -1.194543 | 0.787338  |
| N | 0.959012  | 0.457243  | -1.206327 |
| H | 1.851079  | 0.021151  | -1.012734 |
| H | 0.820567  | 1.233000  | -0.565803 |
| H | 0.153833  | 1.179791  | 1.647528  |
| O | 0.499995  | 2.015444  | 1.321928  |
| H | -0.037378 | 2.692074  | 1.733716  |

#### HTS3b

|   |           |           |           |
|---|-----------|-----------|-----------|
| S | -0.101869 | 0.237006  | 0.167743  |
| S | -0.025378 | -0.263977 | 2.170386  |
| N | 1.471185  | 0.233208  | -0.432999 |
| H | 1.920925  | -0.668366 | -0.377935 |
| H | 2.054212  | 0.952523  | -0.031781 |
| H | 0.325147  | 0.971175  | 2.676103  |
| O | 0.159853  | 2.514459  | 3.116038  |
| H | -0.731011 | 2.661832  | 2.762457  |

#### CPHTS3b

|   |           |           |           |
|---|-----------|-----------|-----------|
| S | -0.299642 | -0.668198 | -1.090556 |
| S | -0.602420 | -1.194543 | 0.787338  |
| N | 0.959012  | 0.457243  | -1.206327 |

|   |           |          |           |
|---|-----------|----------|-----------|
| H | 1.851079  | 0.021151 | -1.012734 |
| H | 0.820567  | 1.233000 | -0.565803 |
| H | 0.153833  | 1.179791 | 1.647528  |
| O | 0.499995  | 2.015444 | 1.321928  |
| H | -0.037378 | 2.692074 | 1.733716  |

#### CRPTS3a

|   |           |           |           |
|---|-----------|-----------|-----------|
| H | -1.664976 | 0.148130  | -0.767111 |
| S | -1.438284 | 0.251164  | 0.553514  |
| S | 0.615431  | 0.297093  | 0.370163  |
| N | 1.079148  | -1.308463 | 0.229550  |
| O | 0.517016  | 0.175595  | -1.909358 |
| H | 0.835957  | 1.064899  | -2.107115 |
| H | 1.390013  | -1.501674 | -0.712202 |
| H | 1.738059  | -1.582287 | 0.940769  |

#### PTS3a

|   |           |           |           |
|---|-----------|-----------|-----------|
| H | 0.060091  | -0.045457 | -0.137378 |
| S | -0.302137 | -0.031247 | 1.292034  |
| S | 1.731500  | 0.011375  | 1.359772  |
| N | 2.220177  | -1.591041 | 1.187523  |
| O | 1.306999  | -0.088545 | -0.900487 |
| H | 1.504040  | 0.762713  | -1.306033 |
| H | 2.240495  | -1.829816 | 0.202255  |
| H | 3.127312  | -1.718319 | 1.615533  |

#### CPPTS3a

|   |           |           |           |
|---|-----------|-----------|-----------|
| H | -0.501239 | 0.228784  | -1.939494 |
| S | -1.267687 | 0.455078  | 0.519185  |
| S | 0.464783  | -0.074612 | 1.231747  |
| N | 1.134500  | -1.185860 | 0.131007  |
| O | 0.267226  | -0.006119 | -2.469014 |
| H | 0.471683  | 0.779470  | -2.976405 |
| H | 1.090647  | -0.839474 | -0.825008 |
| H | 2.092019  | -1.374791 | 0.401067  |

## Reactions starting by HSSCOOH + OH

### BH&HLYP/6-311+G(2df,2p) optimized geometries

#### HSSCOOH

|   |           |           |           |
|---|-----------|-----------|-----------|
| C | 0.000986  | 0.004234  | 0.008353  |
| S | 0.007963  | -0.022030 | 1.792328  |
| S | 2.005145  | -0.006387 | 2.218394  |
| H | 2.189743  | 1.314375  | 2.195090  |
| O | 0.932386  | 0.106162  | -0.709800 |
| O | -1.263756 | -0.099275 | -0.388985 |
| H | -1.281583 | -0.071277 | -1.345018 |

#### SSCOOH

|   |           |           |          |
|---|-----------|-----------|----------|
| S | 0.012904  | 0.000085  | 0.022541 |
| C | -0.005461 | -0.000613 | 1.771988 |
| O | 0.990043  | 0.000315  | 2.417481 |
| O | -1.235104 | -0.002398 | 2.264472 |
| H | -1.177024 | -0.002745 | 3.220391 |

#### SSCOOH

|   |           |           |           |
|---|-----------|-----------|-----------|
| C | 0.000524  | -0.000013 | 0.005071  |
| O | -0.000942 | -0.000019 | 1.181565  |
| O | 1.073564  | 0.000003  | -0.774522 |
| H | 1.855109  | 0.000009  | -0.221816 |
| S | -1.451908 | -0.000023 | -1.075882 |
| S | -2.969891 | -0.000038 | 0.154353  |

#### HSSCOOH

|   |          |          |          |
|---|----------|----------|----------|
| C | 0.002951 | 0.000022 | 0.010281 |
|---|----------|----------|----------|

|   |           |           |           |
|---|-----------|-----------|-----------|
| O | -0.010282 | 0.000078  | 1.194820  |
| O | 1.105804  | -0.000127 | -0.731368 |
| H | 1.858805  | -0.000179 | -0.141757 |
| S | -1.411070 | 0.000121  | -1.046818 |
| H | -2.270189 | 0.000257  | -0.031704 |

#### OSCOOH

|   |           |           |           |
|---|-----------|-----------|-----------|
| C | 0.004458  | 0.000014  | -0.003057 |
| O | -0.002020 | -0.000010 | 1.322585  |
| H | 0.900149  | -0.000022 | 1.643362  |
| O | 0.948131  | 0.000022  | -0.704876 |
| S | -1.719928 | 0.000036  | -0.577906 |
| O | -1.614111 | 0.000060  | -2.053671 |

#### CRBTS1a

|   |           |           |           |
|---|-----------|-----------|-----------|
| S | 0.215755  | -0.411017 | 0.310626  |
| S | 0.405139  | -0.519709 | 2.351362  |
| C | 1.808729  | 0.043691  | -0.330911 |
| H | 0.102651  | 0.745820  | 2.639247  |
| O | -1.912169 | -0.259749 | 4.000711  |
| H | -2.171807 | -1.154170 | 3.765550  |
| O | 1.960091  | 0.108041  | -1.505271 |
| O | 2.739206  | 0.294404  | 0.571581  |
| H | 3.542959  | 0.524462  | 0.105565  |

#### BTS1a

|   |           |           |           |
|---|-----------|-----------|-----------|
| S | 0.077335  | -0.104750 | 0.101553  |
| S | -0.051087 | -0.079368 | 2.205685  |
| C | 1.809058  | 0.002217  | -0.270763 |
| H | -0.658881 | 1.097270  | 2.265100  |
| O | -1.311641 | -0.491948 | 3.810563  |
| H | -1.205842 | -1.434781 | 3.932911  |
| O | 2.167545  | -0.010673 | -1.400407 |
| O | 2.609348  | 0.085231  | 0.778281  |
| H | 3.509574  | 0.129638  | 0.455888  |

#### CPBTS1a

|   |           |           |           |
|---|-----------|-----------|-----------|
| S | 1.136819  | -0.099329 | -0.571904 |
| C | 1.158166  | -0.107919 | 1.185459  |
| O | 2.164805  | -0.110850 | 1.814349  |
| O | -0.053344 | -0.117959 | 1.746771  |
| H | 0.076297  | -0.119115 | 2.694859  |
| S | -1.186146 | 0.425962  | -0.979395 |
| H | -0.803129 | 0.467343  | -2.248491 |
| O | -2.709859 | -0.134495 | -1.442788 |
| H | -3.268202 | -0.146914 | -0.669975 |

#### CRBTS1b = CRFTS1b

|   |           |           |           |
|---|-----------|-----------|-----------|
| S | -0.613489 | 0.528661  | -0.222519 |
| S | -0.458433 | 0.157673  | 1.781975  |
| H | 0.685070  | 0.657351  | -0.493499 |
| C | -0.469626 | 1.805865  | 2.465658  |
| O | 0.509946  | -1.627196 | -1.774352 |
| H | -0.336637 | -2.068687 | -1.670026 |
| O | -0.464482 | 1.689386  | 3.789736  |
| O | -0.470360 | 2.825945  | 1.871901  |
| H | -0.454018 | 2.567508  | 4.169217  |

#### BTS1b

|   |           |           |           |
|---|-----------|-----------|-----------|
| S | 0.060319  | 0.111054  | -0.021716 |
| S | 0.061316  | 0.090847  | 2.076728  |
| H | 1.351958  | -0.168779 | -0.124806 |
| C | -0.514283 | 1.742811  | 2.406433  |
| O | -0.042708 | -1.127594 | -1.727961 |
| H | -0.985561 | -1.239313 | -1.846483 |
| O | -0.589508 | 1.891975  | 3.724678  |
| O | -0.797352 | 2.571222  | 1.613147  |
| H | -0.908469 | 2.775299  | 3.908118  |

#### CPBTS1b

|   |          |           |          |
|---|----------|-----------|----------|
| S | 0.014822 | -0.819103 | 0.083188 |
|---|----------|-----------|----------|

|   |           |           |           |
|---|-----------|-----------|-----------|
| C | 0.274783  | -0.015912 | 1.597920  |
| O | 1.327415  | 0.404239  | 2.010537  |
| O | -0.838186 | 0.102299  | 2.303850  |
| H | -0.621959 | 0.541757  | 3.126534  |
| S | 2.782033  | -0.554006 | -0.808043 |
| H | 2.480912  | 0.631289  | -1.356006 |
| O | 3.480791  | -0.073958 | 0.558870  |
| H | 2.780320  | 0.142165  | 1.203044  |

CRFTS1a = CRHTS3a = CRHTS3b

|   |           |           |          |
|---|-----------|-----------|----------|
| H | 0.315427  | 0.117753  | 0.403265 |
| S | 0.297316  | -0.281483 | 1.676026 |
| S | 2.309181  | -0.212408 | 2.029747 |
| C | 2.567439  | 1.486270  | 2.481490 |
| O | -0.575317 | 2.700074  | 0.780275 |
| H | 0.151249  | 2.698291  | 1.418149 |
| O | 3.827756  | 1.623722  | 2.861674 |
| O | 1.777801  | 2.372385  | 2.447883 |
| H | 3.982645  | 2.541646  | 3.083856 |

FTS1a

|   |           |           |          |
|---|-----------|-----------|----------|
| H | -0.273933 | -0.237156 | 0.313960 |
| S | 0.053868  | 0.084089  | 1.578093 |
| S | 2.200612  | 0.111110  | 1.711843 |
| C | 2.565864  | 1.634373  | 2.540062 |
| O | 0.016586  | 1.757833  | 0.858646 |
| H | 0.220532  | 2.349558  | 1.583657 |
| O | 3.875013  | 1.706898  | 2.736382 |
| O | 1.790589  | 2.458307  | 2.904697 |
| H | 4.063302  | 2.516661  | 3.211428 |

CPFTS1a

|   |           |           |          |
|---|-----------|-----------|----------|
| H | 0.241993  | 0.077487  | 0.048176 |
| S | -0.281193 | 0.085904  | 1.281940 |
| S | 2.397805  | -0.204151 | 2.402405 |
| C | 2.704680  | 1.500457  | 2.484321 |
| O | -0.510821 | 1.663970  | 1.491076 |
| H | 0.337892  | 2.066445  | 1.756188 |
| O | 3.920387  | 1.773738  | 2.929779 |
| O | 1.934059  | 2.378584  | 2.184370 |
| H | 4.017846  | 2.725740  | 2.959560 |

FTS1b

|   |           |           |          |
|---|-----------|-----------|----------|
| H | 0.172443  | 0.132711  | 0.289237 |
| S | 0.063925  | -0.116466 | 1.595613 |
| S | 2.094564  | 0.037894  | 2.319637 |
| C | 2.116412  | 1.797664  | 2.518069 |
| O | 0.656623  | -1.862931 | 1.294607 |
| H | -0.097656 | -2.401512 | 1.523348 |
| O | 3.263897  | 2.144121  | 3.092848 |
| O | 1.275604  | 2.567074  | 2.190043 |
| H | 3.279465  | 3.097474  | 3.173564 |

CPFTS1b

|   |           |           |          |
|---|-----------|-----------|----------|
| H | 0.624279  | 0.243807  | 0.496441 |
| S | 0.191840  | -0.328376 | 1.619371 |
| S | 2.818940  | 0.064514  | 2.724763 |
| C | 2.290370  | 1.721639  | 2.602299 |
| O | 0.107355  | -1.880710 | 1.085240 |
| H | -0.791249 | -2.085770 | 0.847399 |
| O | 3.191244  | 2.566355  | 3.091177 |
| O | 1.249304  | 2.088150  | 2.135220 |
| H | 2.844658  | 3.452705  | 2.990871 |

CRBTS2a = CRFTS2b

|   |           |           |           |
|---|-----------|-----------|-----------|
| S | 0.319824  | 0.651392  | -0.114438 |
| S | -0.005214 | 0.173615  | 1.843167  |
| C | 1.993341  | 0.077341  | -0.378129 |
| H | 0.447368  | 1.310950  | 2.373694  |
| O | -0.343174 | -2.027600 | -0.658034 |
| H | -0.964139 | -1.736717 | -1.330610 |

|   |          |           |           |
|---|----------|-----------|-----------|
| O | 2.261985 | 0.215115  | -1.671972 |
| O | 2.741431 | -0.328711 | 0.437130  |
| H | 3.156676 | -0.086107 | -1.826751 |

BTS2a

|   |           |           |           |
|---|-----------|-----------|-----------|
| S | 0.175676  | 0.134377  | 0.007408  |
| S | 0.400156  | 0.392105  | 2.093895  |
| C | 1.936562  | -0.073061 | -0.287381 |
| H | -0.824552 | 0.912874  | 2.183164  |
| O | -0.111822 | -1.353966 | -1.421270 |
| H | -0.957142 | -1.711560 | -1.153200 |
| O | 2.198226  | 0.050242  | -1.569150 |
| O | 2.727290  | -0.262955 | 0.569892  |
| H | 3.130171  | -0.119910 | -1.704252 |

CPBTS2a = CPFTS2b

|   |           |           |           |
|---|-----------|-----------|-----------|
| S | 0.480723  | 0.994991  | -1.572841 |
| S | -0.147411 | -1.000117 | 2.795238  |
| C | 2.067776  | 0.395825  | -1.106389 |
| H | -0.244748 | -0.427558 | 1.591861  |
| O | -0.556794 | 0.119656  | -0.660617 |
| H | -0.761456 | -0.703151 | -1.095605 |
| O | 2.041818  | -0.616392 | -0.253209 |
| O | 3.045986  | 0.891309  | -1.559775 |
| H | 2.947218  | -0.857514 | -0.056519 |

CRFTS2a

|   |           |           |           |
|---|-----------|-----------|-----------|
| C | 0.104792  | -0.032555 | -0.099305 |
| S | -0.162440 | -0.014120 | 1.669058  |
| S | 1.738344  | -0.082869 | 2.406942  |
| H | 1.975667  | 1.228870  | 2.345316  |
| O | 0.137914  | 2.744338  | 1.485521  |
| H | -0.708835 | 2.908713  | 1.907814  |
| O | -1.089724 | -0.008505 | -0.681954 |
| O | 1.139561  | -0.062195 | -0.662601 |
| H | -0.961083 | -0.002924 | -1.629915 |

FTS2a

|   |           |           |           |
|---|-----------|-----------|-----------|
| C | 0.038700  | 0.156645  | -0.141925 |
| S | -0.243263 | 0.414557  | 1.588500  |
| S | 1.642913  | -0.068233 | 2.502896  |
| H | 2.306418  | 1.008495  | 2.081568  |
| O | 0.259063  | 2.118103  | 1.757593  |
| H | -0.517424 | 2.628572  | 1.532500  |
| O | -1.060798 | -0.372208 | -0.678917 |
| O | 1.038118  | 0.406395  | -0.723990 |
| H | -0.888699 | -0.532122 | -1.606117 |

CPFTS2a

|   |           |           |           |
|---|-----------|-----------|-----------|
| C | -0.410064 | 0.199285  | -0.077072 |
| S | -0.884636 | 1.789917  | 0.503855  |
| S | 2.901470  | 1.077789  | 2.110676  |
| H | 2.217957  | 0.036050  | 1.621455  |
| O | -0.362510 | 1.726988  | 2.032870  |
| H | 0.593421  | 1.820529  | 2.071171  |
| O | -0.902948 | 0.017194  | -1.296876 |
| O | 0.265935  | -0.586532 | 0.504760  |
| H | -0.607629 | -0.833036 | -1.620114 |

FTS2b

|   |           |           |           |
|---|-----------|-----------|-----------|
| C | 0.087487  | -0.153252 | -0.152719 |
| S | 0.022883  | -0.260161 | 1.623471  |
| S | 2.012484  | 0.082578  | 2.304847  |
| H | 1.869506  | 1.406384  | 2.242565  |
| O | 0.532977  | -1.982044 | 1.809310  |
| H | -0.282803 | -2.475088 | 1.874858  |
| O | -1.103516 | 0.264083  | -0.584135 |
| O | 1.024319  | -0.380709 | -0.834626 |
| H | -1.056623 | 0.359409  | -1.534843 |

HTS3b

|   |           |           |           |
|---|-----------|-----------|-----------|
| C | 0.027252  | 0.185773  | 0.129448  |
| S | 0.097658  | -0.345817 | 1.824146  |
| S | 2.030471  | 0.063927  | 2.311121  |
| H | 1.925023  | 1.478389  | 2.352278  |
| O | 0.828582  | 0.858265  | -0.432796 |
| O | -1.106384 | -0.239581 | -0.404969 |
| H | -1.176560 | 0.110497  | -1.292936 |
| O | 1.887310  | 2.706750  | 1.646497  |
| H | 1.715260  | 2.392515  | 0.750267  |

CPHTS3a = CPHTS3ab

|   |           |           |           |
|---|-----------|-----------|-----------|
| C | -0.805125 | -0.306581 | -0.898172 |
| S | -0.470755 | -1.607337 | 0.310475  |
| S | 0.881828  | -0.836409 | 1.491958  |
| H | 2.000197  | 2.673451  | 0.701961  |
| O | -0.302946 | 0.760119  | -0.939135 |
| O | -1.718828 | -0.762054 | -1.736511 |
| H | -1.910969 | -0.085940 | -2.387213 |
| O | 1.521733  | 2.964627  | -0.063414 |
| H | 0.957837  | 2.235274  | -0.304298 |

HTS3a

|   |           |           |           |
|---|-----------|-----------|-----------|
| C | 0.068626  | -0.003906 | 0.065518  |
| S | 0.158948  | 0.099769  | 1.848911  |
| S | 2.083922  | -0.420017 | 2.216143  |
| H | 2.685680  | 0.817506  | 1.994891  |
| O | 0.948278  | -0.256319 | -0.678099 |
| O | -1.184460 | 0.263940  | -0.286202 |
| H | -1.245688 | 0.221642  | -1.240063 |
| O | 3.272508  | 2.156048  | 2.321419  |
| H | 3.022330  | 2.283890  | 3.239806  |

CRPTS12a = CRPTS12b

|   |           |           |           |
|---|-----------|-----------|-----------|
| C | -0.389628 | -0.026706 | -0.485775 |
| S | -0.499791 | 0.109334  | 1.285527  |
| S | 1.455231  | -0.011544 | 1.864784  |
| H | 1.760572  | 1.282172  | 1.755576  |
| O | 0.613359  | -0.076428 | -1.126073 |
| O | -1.611485 | -0.051095 | -0.974593 |
| H | -1.568506 | -0.111728 | -1.939776 |
| O | -0.643882 | -0.233466 | -3.626760 |
| H | 0.153621  | -0.214280 | -3.072677 |

PTS12a

|   |           |           |           |
|---|-----------|-----------|-----------|
| C | -0.028506 | -0.032835 | 0.003034  |
| S | -0.022118 | 0.061202  | 1.779492  |
| S | 1.957582  | -0.003018 | 2.294480  |
| H | 2.215702  | 1.302238  | 2.200440  |
| O | 1.022286  | -0.038971 | -0.647798 |
| O | -1.168425 | -0.084141 | -0.507902 |
| H | -0.795152 | -0.105219 | -1.677254 |
| O | -0.007357 | -0.037170 | -2.536863 |
| H | 0.394899  | -0.891440 | -2.690508 |

CPPTS12a = CPPTS12b

|   |           |           |           |
|---|-----------|-----------|-----------|
| C | -0.167854 | -0.048916 | -0.307662 |
| S | -0.623266 | 0.310019  | 1.361897  |
| S | 1.200416  | 0.141082  | 2.307521  |
| H | 1.596364  | 1.406300  | 2.157774  |
| O | 1.109047  | -0.247672 | -0.495030 |
| O | -0.950339 | -0.101129 | -1.202206 |
| H | -0.803020 | -0.330797 | -3.214254 |
| O | -0.692906 | -0.418296 | -4.157253 |
| H | -1.568599 | -0.493118 | -4.513924 |

PTS12b

|   |           |           |           |
|---|-----------|-----------|-----------|
| C | -0.179529 | -0.016024 | 0.040256  |
| S | 0.012072  | -0.016043 | 1.808978  |
| S | 2.035746  | 0.019059  | 2.112357  |
| H | 2.201204  | 1.342570  | 2.100896  |
| O | 0.792619  | 0.085878  | -0.716184 |



|   |           |           |           |
|---|-----------|-----------|-----------|
| O | -1.363583 | -0.109373 | -0.350139 |
| H | -1.114813 | -0.093071 | -1.552276 |
| O | -0.415409 | -0.111189 | -2.487188 |
| H | -0.128279 | 0.774065  | -2.708235 |

#### CRHTS5a

|   |           |           |           |
|---|-----------|-----------|-----------|
| H | -1.572972 | 1.149711  | -0.516093 |
| S | -0.975313 | 2.190279  | -1.103995 |
| O | 0.580721  | 1.833855  | -0.659414 |
| H | 0.750768  | 2.221715  | 0.192338  |
| S | 1.397276  | -1.087061 | -0.402675 |
| C | -0.054539 | -1.536440 | 0.459442  |
| O | -0.019724 | -2.799616 | 0.860584  |
| O | -0.963047 | -0.794124 | 0.660609  |
| H | -0.837540 | -2.990039 | 1.320787  |

#### HTS5a

|   |           |           |          |
|---|-----------|-----------|----------|
| H | -0.487938 | -0.511714 | 0.960527 |
| S | 0.350193  | 0.381705  | 1.504927 |
| O | 1.726885  | -0.161616 | 0.982973 |
| H | 2.132252  | -0.991749 | 1.504222 |
| S | 2.783498  | -2.385949 | 2.385199 |
| C | 1.232760  | -3.178365 | 2.425640 |
| O | 1.282975  | -4.365479 | 3.015993 |
| O | 0.223274  | -2.715603 | 1.979242 |
| H | 0.400931  | -4.736769 | 3.006914 |

#### CPHTS5a

|   |           |           |           |
|---|-----------|-----------|-----------|
| H | -1.635747 | 1.117126  | -0.434729 |
| S | -1.147168 | 2.296854  | -0.882159 |
| O | 0.333835  | 2.084543  | -0.840460 |
| H | 1.191569  | 0.263527  | -0.192394 |
| S | 1.579849  | -0.940404 | 0.240133  |
| C | -0.058264 | -1.514536 | 0.494762  |
| O | -0.038349 | -2.760272 | 0.952906  |
| O | -1.063238 | -0.904623 | 0.296694  |
| H | -0.942788 | -3.043181 | 1.080706  |

#### CRHTS6a

|   |           |           |           |
|---|-----------|-----------|-----------|
| H | -1.302402 | 0.984275  | -0.438502 |
| O | -1.593558 | 1.807346  | -0.020820 |
| S | -0.643668 | 2.161522  | 1.217766  |
| H | 0.869256  | 0.057687  | 0.904170  |
| S | 1.410939  | -1.085215 | 0.458112  |
| C | 0.249468  | -1.265458 | -0.837668 |
| O | 0.496138  | -2.361287 | -1.533129 |
| O | -0.655357 | -0.524370 | -1.092644 |
| H | -0.154738 | -2.429435 | -2.231231 |

#### HTS6a

|   |          |           |           |
|---|----------|-----------|-----------|
| H | 0.720922 | -1.180757 | -0.154000 |
| O | 0.417582 | -0.194471 | 0.388402  |
| S | 1.324515 | 0.159600  | 1.586459  |
| H | 2.252073 | -1.084353 | 1.439955  |
| S | 3.027039 | -2.578304 | 0.929899  |
| C | 1.981226 | -2.887470 | -0.366521 |
| O | 2.224160 | -3.978031 | -1.058197 |
| O | 1.010061 | -2.200303 | -0.738555 |
| H | 1.575193 | -4.046531 | -1.757919 |

#### CPHTS6a

|   |           |           |           |
|---|-----------|-----------|-----------|
| H | -0.890574 | 0.178913  | -0.727146 |
| O | -1.293658 | 1.614146  | 0.100347  |
| S | -0.576115 | 2.176162  | 1.290017  |
| H | 0.408564  | 1.261399  | 1.481184  |
| S | 1.258124  | -0.952318 | 0.427692  |
| C | 0.283339  | -1.312895 | -0.841627 |
| O | 0.472764  | -2.386221 | -1.569987 |
| O | -0.737586 | -0.623195 | -1.260603 |
| H | -0.188503 | -2.429520 | -2.259389 |

## CRHTS8a = CRHTS8b

|   |           |           |           |
|---|-----------|-----------|-----------|
| C | -0.537371 | 0.509989  | -0.974187 |
| S | -0.991980 | 1.226474  | 0.566145  |
| O | 0.382024  | 1.057085  | 1.401550  |
| H | 0.503255  | 0.144228  | 1.677328  |
| S | 1.271766  | -2.149089 | 1.509654  |
| H | 1.340238  | -1.677981 | 0.258748  |
| O | -1.518646 | 0.700793  | -1.848663 |
| O | 0.469843  | -0.078107 | -1.203681 |
| H | -1.280429 | 0.273942  | -2.670607 |

## HTS8a

|   |           |           |           |
|---|-----------|-----------|-----------|
| C | 0.052734  | 0.015900  | -0.108582 |
| S | -0.099145 | -0.024551 | 1.674057  |
| O | 1.392636  | 0.008164  | 2.106415  |
| H | 1.933319  | -1.016212 | 2.070031  |
| S | 2.602081  | -2.471345 | 2.121084  |
| H | 2.342420  | -2.633519 | 3.418791  |
| O | -1.163053 | 0.092548  | -0.629914 |
| O | 1.071437  | -0.030165 | -0.698643 |
| H | -1.094475 | 0.097995  | -1.584600 |

## CPHTS8a = CPHTS8b

|   |           |           |           |
|---|-----------|-----------|-----------|
| C | -0.832385 | 0.602794  | -1.026577 |
| S | -1.075756 | 1.461647  | 0.555973  |
| O | -0.129274 | 0.792017  | 1.475322  |
| H | 1.485080  | -1.414465 | 0.213665  |
| S | 2.335663  | -2.010672 | 1.047525  |
| H | 1.973479  | -1.238471 | 2.068895  |
| O | -1.644195 | 1.136121  | -1.923445 |
| O | -0.070934 | -0.279536 | -1.197420 |
| H | -1.527425 | 0.693138  | -2.764641 |

## HTS8b

|   |           |           |           |
|---|-----------|-----------|-----------|
| C | -0.023964 | 0.000381  | 0.019467  |
| O | -0.043389 | 0.095845  | 1.194661  |
| O | 1.051568  | -0.065685 | -0.750960 |
| H | 1.834048  | -0.032633 | -0.200742 |
| S | -1.475294 | -0.107664 | -1.019584 |
| O | -2.605609 | 0.133144  | 0.017792  |
| H | -2.944307 | -0.815493 | 0.599303  |
| S | -3.302892 | -2.126479 | 1.436350  |
| H | -2.396732 | -1.846488 | 2.373464  |

## QCISD/6-311+G(2df,2p) optimized geometries

## HSSCOOH

|   |           |           |           |
|---|-----------|-----------|-----------|
| C | 0.000958  | 0.004869  | 0.016767  |
| S | -0.004999 | -0.026089 | 1.808932  |
| S | 2.010777  | -0.012904 | 2.218826  |
| H | 2.187132  | 1.316114  | 2.173233  |
| O | 0.943987  | 0.114699  | -0.706312 |
| O | -1.276805 | -0.103573 | -0.388598 |
| H | -1.270166 | -0.067314 | -1.352486 |

## OHSCOOH

|   |           |           |           |
|---|-----------|-----------|-----------|
| C | -0.003543 | 0.002556  | 0.017383  |
| S | -0.008106 | -0.008767 | 1.790411  |
| O | 1.614127  | 0.003875  | 2.059369  |
| H | 1.969231  | -0.859938 | 1.832198  |
| O | 0.962891  | -0.123105 | -0.677105 |
| O | -1.266432 | 0.140806  | -0.419650 |
| H | -1.240093 | 0.098164  | -1.382697 |

## SCOOH

|   |           |           |          |
|---|-----------|-----------|----------|
| S | 0.017743  | 0.000103  | 0.013112 |
| C | -0.008254 | -0.000634 | 1.767818 |

|   |           |           |          |
|---|-----------|-----------|----------|
| O | 0.997712  | 0.000327  | 2.423931 |
| O | -1.251320 | -0.002421 | 2.264902 |
| H | -1.170522 | -0.002732 | 3.227110 |

#### HSSCO2

|   |           |           |           |
|---|-----------|-----------|-----------|
| C | 0.037179  | 0.011789  | 0.033095  |
| S | -0.046992 | 0.048626  | 1.813583  |
| S | 1.969396  | -0.032785 | 2.231236  |
| H | 2.215678  | 1.282172  | 2.128538  |
| O | 1.074926  | 0.085225  | -0.627268 |
| O | -1.059683 | -0.076860 | -0.601493 |

#### SSCOOH

|   |           |           |           |
|---|-----------|-----------|-----------|
| C | -0.001957 | -0.000008 | 0.000925  |
| O | -0.004555 | -0.000012 | 1.190653  |
| O | 1.083830  | 0.000000  | -0.787289 |
| H | 1.858229  | 0.000003  | -0.211196 |
| S | -1.455699 | -0.000018 | -1.091511 |
| S | -2.973392 | -0.000047 | 0.167187  |

#### CRBTS1a

|   |           |           |           |
|---|-----------|-----------|-----------|
| S | 0.169527  | -0.357998 | 0.683359  |
| S | 0.744393  | -0.580293 | 2.655631  |
| C | 1.650039  | 0.081396  | -0.208368 |
| H | 0.478845  | 0.671898  | 3.056231  |
| O | -2.078679 | -0.236301 | 3.185874  |
| H | -2.073258 | -1.161713 | 3.471700  |
| O | 1.602936  | 0.203899  | -1.400295 |
| O | 2.744015  | 0.259318  | 0.538459  |
| H | 3.452738  | 0.491566  | -0.074134 |

#### BTS1a

|   |           |           |           |
|---|-----------|-----------|-----------|
| S | 0.086180  | -0.226539 | 0.133397  |
| S | 0.019738  | -0.185408 | 2.234849  |
| C | 1.806897  | -0.008387 | -0.286145 |
| H | -0.435886 | 1.066099  | 2.329817  |
| O | -1.399871 | -0.449660 | 3.857291  |
| H | -1.418149 | -1.415175 | 3.900885  |
| O | 2.146881  | -0.028315 | -1.434734 |
| O | 2.626275  | 0.169208  | 0.755221  |
| H | 3.513344  | 0.271014  | 0.388229  |

#### CPBTS1a

|   |           |           |           |
|---|-----------|-----------|-----------|
| S | 0.010962  | 0.274059  | -0.142301 |
| S | -0.280477 | 0.233547  | 2.205594  |
| C | 1.765551  | 0.062977  | -0.221984 |
| H | -1.556985 | 0.487925  | 1.911264  |
| O | -0.794759 | -0.643903 | 3.593235  |
| H | 0.006614  | -0.889643 | 4.066191  |
| O | 2.398685  | 0.239256  | -1.225034 |
| O | 2.321996  | -0.323155 | 0.946428  |
| H | 3.269198  | -0.393159 | 0.775420  |

#### CRBTS1b = CRFTS1b

|   |           |           |           |
|---|-----------|-----------|-----------|
| S | -0.667313 | 0.807995  | -0.438139 |
| S | -0.398592 | 0.173216  | 1.502135  |
| H | 0.627779  | 0.959245  | -0.751950 |
| C | -0.454875 | 1.737188  | 2.375410  |
| O | 0.494960  | -1.765503 | -1.061764 |
| H | -0.362603 | -1.971811 | -1.461725 |
| O | -0.385009 | 1.459652  | 3.689508  |
| O | -0.529149 | 2.832940  | 1.908089  |
| H | -0.397227 | 2.303583  | 4.156527  |

#### BTS1b

|   |           |           |           |
|---|-----------|-----------|-----------|
| S | -0.093676 | 0.129062  | -0.049010 |
| S | -0.131975 | 0.038305  | 2.046383  |
| H | 1.235202  | 0.066231  | -0.158499 |
| C | -0.495205 | 1.752282  | 2.422681  |
| O | 0.048089  | -1.184878 | -1.765925 |
| H | -0.880689 | -1.440202 | -1.847311 |
| O | -0.624697 | 1.852200  | 3.756437  |

|   |           |          |          |
|---|-----------|----------|----------|
| O | -0.607320 | 2.656529 | 1.651430 |
| H | -0.814016 | 2.777993 | 3.951951 |

CPBTS1b

|   |           |           |           |
|---|-----------|-----------|-----------|
| S | 0.406487  | -0.006912 | -0.033152 |
| S | 0.474086  | 0.097718  | 2.311408  |
| H | 1.073427  | -1.156286 | 0.101577  |
| C | -0.513592 | 1.568931  | 2.316061  |
| O | -0.383170 | -0.643614 | -1.420831 |
| H | -0.961659 | 0.057972  | -1.737745 |
| O | -0.564552 | 2.085986  | 3.555805  |
| O | -1.073583 | 2.059402  | 1.370873  |
| H | -1.117746 | 2.874755  | 3.499180  |

CRFTS1a = CRHTS3a = CRHTS3b

|   |           |           |          |
|---|-----------|-----------|----------|
| H | 0.311306  | 0.138465  | 0.423693 |
| S | 0.301020  | -0.294133 | 1.693868 |
| S | 2.333182  | -0.231797 | 2.015253 |
| C | 2.572462  | 1.473620  | 2.486689 |
| O | -0.589761 | 2.735770  | 0.748452 |
| H | 0.133012  | 2.692927  | 1.398584 |
| O | 3.849725  | 1.620686  | 2.859322 |
| O | 1.764802  | 2.360405  | 2.471931 |
| H | 3.977748  | 2.550306  | 3.084573 |

FTS1a

|   |           |           |          |
|---|-----------|-----------|----------|
| H | -0.314676 | -0.267548 | 0.375745 |
| S | 0.052653  | 0.116434  | 1.616833 |
| S | 2.239680  | 0.118990  | 1.635303 |
| C | 2.566429  | 1.612763  | 2.538198 |
| O | 0.039634  | 1.775679  | 0.810020 |
| H | 0.246726  | 2.371051  | 1.542667 |
| O | 3.889238  | 1.722507  | 2.727942 |
| O | 1.760302  | 2.403244  | 2.952240 |
| H | 4.032448  | 2.528552  | 3.239820 |

CPFTS1a

|   |           |           |          |
|---|-----------|-----------|----------|
| H | 0.282096  | 0.122067  | 0.027542 |
| S | -0.262308 | 0.071505  | 1.260264 |
| S | 2.379918  | -0.218437 | 2.467262 |
| C | 2.705233  | 1.498281  | 2.489240 |
| O | -0.555421 | 1.659551  | 1.506513 |
| H | 0.296758  | 2.062521  | 1.769147 |
| O | 3.940093  | 1.763166  | 2.930436 |
| O | 1.941347  | 2.385339  | 2.159438 |
| H | 4.034932  | 2.724181  | 2.927973 |

FTS1b

|   |           |           |          |
|---|-----------|-----------|----------|
| H | 0.191008  | 0.163578  | 0.306592 |
| S | 0.067074  | -0.117973 | 1.613184 |
| S | 2.109279  | 0.016088  | 2.338259 |
| C | 2.117310  | 1.787735  | 2.515030 |
| O | 0.661411  | -1.878575 | 1.284044 |
| H | -0.118501 | -2.396644 | 1.513633 |
| O | 3.270048  | 2.150972  | 3.102305 |
| O | 1.266285  | 2.556532  | 2.164742 |
| H | 3.261363  | 3.114315  | 3.159178 |

CPFTS1b

|   |           |           |          |
|---|-----------|-----------|----------|
| H | 0.627262  | 0.246925  | 0.513117 |
| S | 0.174279  | -0.333462 | 1.633836 |
| S | 2.815141  | 0.057193  | 2.732730 |
| C | 2.284879  | 1.727066  | 2.603401 |
| O | 0.114119  | -1.904634 | 1.084771 |
| H | -0.789720 | -2.085266 | 0.816853 |
| O | 3.212564  | 2.569204  | 3.086622 |
| O | 1.233022  | 2.105954  | 2.142370 |
| H | 2.855195  | 3.459334  | 2.979082 |

CRBTS2a = CRFTS2b

|   |          |          |           |
|---|----------|----------|-----------|
| S | 0.289532 | 0.730070 | -0.098601 |
|---|----------|----------|-----------|

|   |           |           |           |
|---|-----------|-----------|-----------|
| S | -0.033431 | 0.204358  | 1.862671  |
| C | 1.934191  | 0.061589  | -0.378579 |
| H | 0.487776  | 1.312716  | 2.410935  |
| O | -0.229194 | -1.987001 | -0.646231 |
| H | -0.797964 | -1.720135 | -1.383722 |
| O | 2.198510  | 0.200247  | -1.689177 |
| O | 2.675327  | -0.397916 | 0.432982  |
| H | 3.083351  | -0.154649 | -1.836220 |

#### BTS2a

|   |           |           |           |
|---|-----------|-----------|-----------|
| S | 0.163449  | 0.196539  | 0.001174  |
| S | 0.344805  | 0.305997  | 2.099272  |
| C | 1.921751  | -0.074665 | -0.285232 |
| H | -0.766826 | 1.053450  | 2.182767  |
| O | -0.099989 | -1.405559 | -1.463765 |
| H | -0.910862 | -1.790380 | -1.104941 |
| O | 2.196905  | 0.154641  | -1.566455 |
| O | 2.701936  | -0.394185 | 0.560381  |
| H | 3.123395  | -0.077692 | -1.704093 |

#### CPBTS2a = CPFTS2b

|   |           |           |           |
|---|-----------|-----------|-----------|
| S | 0.429143  | 1.057983  | -1.397130 |
| S | 0.224918  | -0.626430 | 2.738112  |
| C | 2.009742  | 0.399198  | -0.951235 |
| H | -0.234855 | -0.420308 | 1.492484  |
| O | -0.641618 | -0.021620 | -0.742963 |
| H | -0.744187 | -0.757189 | -1.352656 |
| O | 1.952914  | -0.794398 | -0.345993 |
| O | 3.012586  | 1.002848  | -1.210619 |
| H | 2.864468  | -1.043036 | -0.147857 |

#### CRFTS2a

|   |           |           |           |
|---|-----------|-----------|-----------|
| C | 0.101135  | 0.005238  | -0.051737 |
| S | -0.163240 | -0.050311 | 1.725064  |
| S | 1.767343  | -0.105339 | 2.427044  |
| H | 1.980041  | 1.217806  | 2.350811  |
| O | 0.143103  | 2.638220  | 1.364083  |
| H | -0.717954 | 2.827743  | 1.765074  |
| O | -1.111981 | 0.041079  | -0.629694 |
| O | 1.143697  | 0.010318  | -0.627677 |
| H | -0.967950 | 0.093999  | -1.582091 |

#### FTS2a

|   |           |           |           |
|---|-----------|-----------|-----------|
| C | 0.031704  | 0.172435  | -0.126578 |
| S | -0.273791 | 0.414332  | 1.615269  |
| S | 1.637616  | -0.078271 | 2.520856  |
| H | 2.293827  | 0.974081  | 2.009088  |
| O | 0.270489  | 2.126687  | 1.771741  |
| H | -0.509538 | 2.631461  | 1.509225  |
| O | -1.057032 | -0.399003 | -0.675121 |
| O | 1.037157  | 0.460652  | -0.704683 |
| H | -0.855404 | -0.542171 | -1.607689 |

#### CPFTS2a

|   |           |           |           |
|---|-----------|-----------|-----------|
| C | -0.405983 | 0.196273  | -0.063078 |
| S | -0.831988 | 1.821395  | 0.493486  |
| S | 2.881633  | 1.110492  | 2.027919  |
| H | 2.189073  | 0.041749  | 1.590874  |
| O | -0.379886 | 1.719456  | 2.063146  |
| H | 0.584706  | 1.791197  | 2.111455  |
| O | -0.858378 | 0.035558  | -1.317265 |
| O | 0.209655  | -0.628728 | 0.554864  |
| H | -0.577835 | -0.839209 | -1.610676 |

#### FTS2b

|   |           |           |           |
|---|-----------|-----------|-----------|
| C | 0.078275  | -0.166107 | -0.149967 |
| S | 0.009552  | -0.258391 | 1.640118  |
| S | 2.017978  | 0.089509  | 2.313792  |
| H | 1.857833  | 1.419850  | 2.245305  |
| O | 0.555939  | -1.989334 | 1.787392  |
| H | -0.273423 | -2.473981 | 1.875571  |

|   |           |           |           |
|---|-----------|-----------|-----------|
| O | -1.110626 | 0.297316  | -0.583724 |
| O | 1.016058  | -0.433450 | -0.836583 |
| H | -1.044871 | 0.375787  | -1.543175 |

HTS3b

|   |           |           |           |
|---|-----------|-----------|-----------|
| C | 0.030474  | 0.190183  | 0.132398  |
| S | 0.089762  | -0.335733 | 1.838661  |
| S | 2.046479  | 0.061906  | 2.304065  |
| H | 1.921578  | 1.467428  | 2.380402  |
| O | 0.849277  | 0.849441  | -0.446555 |
| O | -1.124126 | -0.228356 | -0.399431 |
| H | -1.173005 | 0.127818  | -1.295117 |
| O | 1.881086  | 2.719879  | 1.627959  |
| H | 1.707088  | 2.358150  | 0.740676  |

HTS3a

|   |           |           |           |
|---|-----------|-----------|-----------|
| C | 0.092479  | 0.005165  | 0.091206  |
| S | 0.136795  | 0.163956  | 1.880210  |
| S | 2.044668  | -0.450152 | 2.287417  |
| H | 2.693038  | 0.741437  | 1.979943  |
| O | 0.988522  | -0.312320 | -0.628156 |
| O | -1.151178 | 0.323819  | -0.305698 |
| H | -1.167744 | 0.253274  | -1.267784 |
| O | 3.278330  | 2.131905  | 2.285787  |
| H | 2.895233  | 2.305469  | 3.159400  |

CRPTS12a = CRPTS12b

|   |           |           |           |
|---|-----------|-----------|-----------|
| C | -0.389492 | -0.026241 | -0.472121 |
| S | -0.514495 | 0.111047  | 1.307078  |
| S | 1.459139  | -0.017027 | 1.872788  |
| H | 1.761953  | 1.282691  | 1.735742  |
| O | 0.626491  | -0.071820 | -1.114638 |
| O | -1.624610 | -0.054786 | -0.968973 |
| H | -1.559232 | -0.111587 | -1.939401 |
| O | -0.646142 | -0.233167 | -3.649317 |
| H | 0.155879  | -0.212851 | -3.090927 |

CPPTS12a = CPPTS12b

|   |           |           |           |
|---|-----------|-----------|-----------|
| C | -0.162564 | -0.017405 | -0.240925 |
| S | -0.666181 | 0.333488  | 1.424186  |
| S | 1.192786  | 0.092684  | 2.299881  |
| H | 1.635864  | 1.344079  | 2.101611  |
| O | 1.090029  | -0.219563 | -0.460516 |
| O | -0.941055 | -0.061708 | -1.179703 |
| H | -0.794476 | -0.218609 | -3.279144 |
| O | -0.727770 | -0.289830 | -4.233421 |
| H | -1.526790 | -0.745663 | -4.495105 |

PTS12a

|   |           |           |           |
|---|-----------|-----------|-----------|
| C | -0.039701 | -0.033241 | 0.009605  |
| S | -0.034045 | 0.053877  | 1.794296  |
| S | 1.967205  | -0.013619 | 2.283388  |
| H | 2.217059  | 1.299438  | 2.167528  |
| O | 1.027852  | -0.030398 | -0.642715 |
| O | -1.189849 | -0.086592 | -0.505764 |
| H | -0.787369 | -0.101935 | -1.698282 |
| O | -0.008959 | -0.026732 | -2.548890 |
| H | 0.416718  | -0.890152 | -2.642044 |

PTS12b

|   |           |           |           |
|---|-----------|-----------|-----------|
| C | -0.190289 | -0.018946 | 0.048270  |
| S | -0.000639 | -0.012849 | 1.825144  |
| S | 2.041490  | 0.015708  | 2.102760  |
| H | 2.201881  | 1.347085  | 2.061629  |
| O | 0.799060  | 0.087632  | -0.709908 |
| O | -1.384097 | -0.118363 | -0.346919 |
| H | -1.107483 | -0.097075 | -1.574748 |
| O | -0.414933 | -0.114695 | -2.499230 |
| H | -0.104962 | 0.787375  | -2.658533 |

## Reactions starting by HSSCN + OH

### BH&HLYP/6-311+G(2df,2p) optimized geometries

#### HSSCN

|   |           |           |           |
|---|-----------|-----------|-----------|
| C | -0.004531 | -0.004612 | 0.001096  |
| S | -0.016649 | -0.022258 | 1.693111  |
| S | 1.993058  | 0.019031  | 2.149325  |
| H | 2.140990  | 1.345121  | 2.150470  |
| N | -0.058528 | 0.010539  | -1.138019 |

#### SCN

|   |           |           |          |
|---|-----------|-----------|----------|
| S | 0.253056  | 0.478988  | 1.093518 |
| C | -0.129062 | -0.513575 | 2.321593 |
| N | -0.401489 | -1.221145 | 3.197032 |

#### SH

|   |           |           |          |
|---|-----------|-----------|----------|
| S | 0.011863  | -0.020785 | 0.004435 |
| H | -0.105534 | -0.168441 | 1.325552 |

#### HSCN

|   |           |          |           |
|---|-----------|----------|-----------|
| N | -1.848235 | 0.594475 | -0.435514 |
| C | -1.412728 | 1.617891 | -0.683014 |
| S | -0.681891 | 3.099364 | -1.034682 |
| H | -1.824794 | 3.740576 | -1.283550 |

#### OSCN

|   |           |          |           |
|---|-----------|----------|-----------|
| C | -0.753775 | 0.838598 | -0.779350 |
| S | -0.666742 | 1.360858 | 0.861197  |
| O | 0.724179  | 1.790257 | 1.094779  |
| N | -0.882774 | 0.478123 | -1.853706 |

#### CRFTS1a = CRBTS1b

|   |           |           |          |
|---|-----------|-----------|----------|
| H | 0.241871  | 0.236814  | 0.260323 |
| S | -0.038157 | 0.183964  | 1.563283 |
| S | 1.907651  | 0.146352  | 2.253311 |
| C | 2.201646  | 1.795113  | 2.503914 |
| O | 0.770901  | -2.464553 | 1.194551 |
| H | -0.001480 | -2.817530 | 1.643615 |
| N | 2.461575  | 2.889646  | 2.691838 |

#### FTS1a

|   |           |           |          |
|---|-----------|-----------|----------|
| H | 0.157486  | 0.102463  | 0.203272 |
| S | 0.047674  | -0.056026 | 1.523547 |
| S | 2.101201  | 0.041890  | 2.202650 |
| C | 2.159849  | 1.703228  | 2.485647 |
| O | 0.615291  | -1.849519 | 1.282204 |
| H | -0.088137 | -2.367146 | 1.667985 |
| N | 2.233915  | 2.824545  | 2.684862 |

#### CPFTS1a = CPFTS1b = CPBTS1b = CPBTS1a

|   |           |           |          |
|---|-----------|-----------|----------|
| H | 0.068720  | 0.164802  | 0.264177 |
| S | -0.243303 | -0.341902 | 1.462021 |
| S | 2.551506  | 0.235923  | 2.509893 |
| C | 2.379535  | 1.869879  | 2.568088 |
| O | 0.312602  | -1.869495 | 1.242314 |
| H | -0.401317 | -2.426755 | 0.948246 |
| N | 2.251853  | 3.013760  | 2.601370 |

#### CRFTS1b = CRBTS1a = CRHTS3b = CRHTS3a

|   |           |           |          |
|---|-----------|-----------|----------|
| H | -0.036872 | 0.027371  | 0.728618 |
| S | 0.526544  | -0.785625 | 1.626052 |
| S | 2.436976  | -0.022995 | 1.478720 |
| C | 2.307267  | 1.386523  | 2.403734 |
| O | -0.278475 | 2.660641  | 0.983795 |
| H | 0.365987  | 2.971875  | 1.631296 |
| N | 2.226936  | 2.366865  | 2.982846 |

FTS1b

|   |           |           |          |
|---|-----------|-----------|----------|
| H | 0.160280  | 0.079558  | 0.063013 |
| S | 0.009610  | 0.029528  | 1.390353 |
| S | 2.013703  | -0.073439 | 2.193130 |
| C | 2.616544  | 1.489604  | 2.368943 |
| O | 0.090714  | 1.871777  | 1.272697 |
| H | -0.380000 | 2.196372  | 2.038007 |
| N | 3.092793  | 2.515030  | 2.527127 |

BTS1b

|   |           |           |           |
|---|-----------|-----------|-----------|
| S | -0.114094 | -0.048978 | -0.045261 |
| S | -0.141987 | 0.002301  | 2.071064  |
| H | 1.198103  | 0.115727  | -0.156902 |
| C | -0.735765 | 1.558254  | 2.333920  |
| O | 0.198731  | -1.293594 | -1.757360 |
| H | -0.650606 | -1.724121 | -1.863642 |
| N | -1.138753 | 2.602113  | 2.558620  |

BTS1a

|   |           |           |           |
|---|-----------|-----------|-----------|
| S | -0.091986 | -0.118634 | -0.041784 |
| S | -0.291148 | -0.084075 | 2.054675  |
| C | -0.710335 | 1.525629  | 2.338520  |
| N | -0.993070 | 2.603766  | 2.581297  |
| H | 1.099183  | 0.467459  | -0.082652 |
| O | -0.309906 | 0.886488  | -1.947064 |
| H | -1.258828 | 0.956701  | -2.060579 |

CRFTS2a = CRBTS2b

|   |           |           |          |
|---|-----------|-----------|----------|
| C | 0.113099  | -0.054068 | 1.146330 |
| S | 0.346831  | 1.595320  | 1.438551 |
| S | 1.985230  | 1.583312  | 2.689168 |
| H | 2.921593  | 1.611937  | 1.738899 |
| O | -0.572361 | -4.071135 | 0.438760 |
| H | -0.411810 | -3.128867 | 0.585232 |
| N | -0.086424 | -1.151848 | 0.917079 |

FTS2a

|   |           |           |           |
|---|-----------|-----------|-----------|
| C | 0.053364  | -0.024989 | 0.016894  |
| S | 0.018124  | -0.164740 | 1.687630  |
| S | 2.044268  | -0.009742 | 2.354804  |
| H | 2.013014  | 1.322424  | 2.308091  |
| O | 0.398298  | -1.949362 | 1.836435  |
| H | -0.449247 | -2.390117 | 1.793455  |
| N | 0.023070  | 0.142610  | -1.114603 |

CPFTS2a = CPFTS2b

|   |           |           |           |
|---|-----------|-----------|-----------|
| C | -0.767866 | -0.356513 | -0.536538 |
| S | -0.010206 | -0.007980 | 0.935669  |
| S | 2.084587  | 0.650546  | 4.019920  |
| H | 2.993566  | 0.675504  | 3.042702  |
| O | 0.826685  | -1.388035 | 1.189571  |
| H | 0.275212  | -2.016313 | 1.648095  |
| N | -1.306271 | -0.543780 | -1.525502 |

FTS2b

|   |           |           |           |
|---|-----------|-----------|-----------|
| C | 0.070787  | -0.032819 | -0.101551 |
| S | -0.153883 | 0.195067  | 1.543022  |
| S | 1.796662  | 0.025495  | 2.476159  |
| H | 2.186143  | 1.287551  | 2.297645  |
| O | 0.118375  | 1.970290  | 1.624206  |
| H | -0.720711 | 2.362460  | 1.384800  |
| N | 0.179002  | -0.259782 | -1.218282 |

BTS2b

|   |           |           |           |
|---|-----------|-----------|-----------|
| S | 0.089017  | -0.103719 | 0.001382  |
| S | 0.027138  | 0.021038  | 2.130521  |
| C | 1.766190  | -0.018682 | -0.176647 |
| H | -0.711463 | 1.131211  | 2.131765  |
| O | 0.060641  | -1.254792 | -1.655154 |
| H | -0.866927 | -1.468736 | -1.758950 |
| N | 2.894669  | 0.062129  | -0.304011 |



## CPBTS2b = CPBTS2a

|   |           |           |           |
|---|-----------|-----------|-----------|
| S | -0.653935 | 0.116526  | 1.723396  |
| S | 1.068513  | 0.697627  | 2.694844  |
| C | -0.052666 | -0.458371 | 0.250815  |
| H | 1.116313  | 1.943755  | 2.219896  |
| O | 1.243784  | -1.891687 | -3.407057 |
| H | 0.935930  | -1.556379 | -2.553874 |
| N | 0.296859  | -0.854261 | -0.758449 |

## BTS2a

|   |           |           |           |
|---|-----------|-----------|-----------|
| S | -0.046228 | 0.016718  | -0.115110 |
| S | 0.135719  | 0.361101  | 1.970463  |
| H | 1.023929  | -0.601275 | 2.222097  |
| C | -0.875766 | -1.459244 | -0.054952 |
| N | -1.424999 | -2.457028 | -0.027661 |
| O | 0.740989  | -0.416047 | -1.947723 |
| H | 1.398213  | -1.092740 | -1.780737 |

## HTS3b

|   |          |           |           |
|---|----------|-----------|-----------|
| H | 0.357368 | -0.082268 | -0.303829 |
| S | 0.271567 | -0.141862 | 1.091141  |
| S | 2.266338 | -0.322098 | 1.503853  |
| C | 2.534369 | -1.985824 | 1.340671  |
| O | 0.393569 | 0.429163  | -1.686989 |
| H | 0.495711 | 1.379509  | -1.589189 |
| N | 2.778369 | -3.095654 | 1.246318  |

## CPHTS3b = CPHTS3a

|   |           |           |           |
|---|-----------|-----------|-----------|
| H | -0.480671 | 1.152964  | -3.496039 |
| S | -0.392236 | 0.468595  | 2.365732  |
| S | -0.427930 | 0.731237  | 0.415717  |
| C | 0.200071  | -0.722436 | -0.214053 |
| O | -0.310372 | 0.682074  | -2.689669 |
| H | 0.049469  | -0.162039 | -2.938900 |
| N | 0.613228  | -1.673445 | -0.687300 |

## HTS3a

|   |          |           |           |
|---|----------|-----------|-----------|
| H | 0.378130 | 0.335522  | -0.137061 |
| S | 0.118579 | -0.142401 | 1.154286  |
| S | 2.055363 | -0.253710 | 1.804207  |
| C | 2.491869 | -1.830377 | 1.367838  |
| O | 0.606024 | 0.373514  | -1.584145 |
| H | 0.736662 | -0.546994 | -1.828449 |
| N | 2.836261 | -2.879346 | 1.081679  |

## CRHTS5a = CRHTS6a

|   |           |           |           |
|---|-----------|-----------|-----------|
| H | -0.088956 | 2.087227  | 0.246311  |
| S | -0.012252 | 1.543842  | -0.976241 |
| O | -1.408991 | 0.749262  | -1.019068 |
| H | -1.348090 | -0.106067 | -0.565198 |
| S | 1.841641  | -0.476382 | 0.136793  |
| C | 0.393009  | -1.242872 | 0.321370  |
| N | -0.665497 | -1.688101 | 0.396933  |

## HTS5a

|   |           |           |          |
|---|-----------|-----------|----------|
| H | -0.282214 | -0.791605 | 0.589935 |
| S | 0.164674  | -0.109381 | 1.660539 |
| O | 1.676783  | -0.044417 | 1.388963 |
| H | 2.269145  | -1.006686 | 1.600465 |
| S | 2.831380  | -2.521316 | 2.012051 |
| C | 1.233644  | -2.897191 | 2.228741 |
| N | 0.098217  | -3.050338 | 2.347744 |

## CPHTS5a

|   |           |           |           |
|---|-----------|-----------|-----------|
| H | -1.864788 | 0.613263  | -0.441655 |
| S | -1.308837 | 1.814645  | -0.729324 |
| O | 0.155074  | 1.566566  | -0.560336 |
| H | 1.647087  | 0.007093  | -0.027054 |
| S | 1.697984  | -1.281270 | 0.328336  |
| C | 0.021822  | -1.464676 | 0.257077  |

N -1.107963 -1.614219 0.216215

HTS6a

H -0.230396 -0.387075 0.344180  
O 0.160600 -0.076644 1.160624  
S 1.726588 0.250871 0.955088  
H 2.267953 -1.148465 1.274140  
S 2.416849 -2.792429 1.185523  
C 1.036951 -2.911268 0.260549  
N 0.080488 -2.949533 -0.368359

CPHTS6a

H -1.498984 1.165498 -0.545895  
O -1.904051 2.031023 -0.677441  
S -1.016950 3.163892 0.036272  
H 1.793180 -2.248403 1.039416  
S 0.801665 -2.840223 0.370298  
C -0.016607 -1.404132 0.036813  
N -0.610935 -0.468218 -0.217103

CRHTS8a = CRHTS8b

C -1.143115 0.631281 -0.483314  
S -0.124750 1.535630 0.521223  
O 1.339502 1.125104 -0.048758  
H 1.574066 0.253978 0.289079  
S 1.386108 -2.068121 0.877363  
H 0.247392 -2.187380 0.187586  
N -1.850701 0.006220 -1.125819

HTS8a

C -0.395102 0.358310 0.126170  
S 0.449713 0.341140 1.600864  
O 1.857487 -0.188310 1.210169  
H 1.933276 -1.354279 1.206516  
S 2.043647 -2.946182 1.265554  
H 2.605466 -2.945519 2.474814  
N -1.013622 0.396107 -0.831709

CPHTS8a = CPHTS8b

C -0.756958 0.837049 -0.777370  
S -0.667653 1.361764 0.863375  
O 0.724132 1.789010 1.090573  
H 0.723240 -2.226705 -0.689389  
S 0.882210 -2.296216 0.630470  
H 2.048024 -1.654539 0.598698  
N -0.878634 0.480014 -1.853657

HTS8b

C -0.006750 0.018994 -0.006159  
S 0.030038 0.052605 1.693063  
O 1.547087 -0.014558 2.022233  
H 1.949020 -1.107955 2.132831  
S 2.494312 -2.603135 2.228987  
H 2.905716 -2.626388 0.960782  
N -0.089866 -0.000376 -1.143840

## QCISD/6-311+G(2df,2p) optimized geometries

HSSCN

C -0.005662 -0.003663 0.006572  
S -0.027758 -0.024718 1.712609  
S 1.999341 0.013576 2.147426  
H 2.137648 1.348387 2.141237  
N -0.049229 0.014238 -1.151861

HOSCN

S 0.004511 -0.012406 -0.189217

|   |           |          |           |
|---|-----------|----------|-----------|
| C | -0.338130 | 0.294787 | 1.452360  |
| N | -0.526587 | 0.501299 | 2.578284  |
| O | -1.468009 | 0.285564 | -0.874664 |
| H | -1.528177 | 1.228502 | -1.053219 |

SCN

|   |           |           |          |
|---|-----------|-----------|----------|
| S | 0.257371  | 0.490184  | 1.079669 |
| C | -0.129316 | -0.514207 | 2.322366 |
| N | -0.405550 | -1.231710 | 3.210108 |

SSCN

|   |           |          |           |
|---|-----------|----------|-----------|
| S | -0.016645 | 0.000000 | -0.012415 |
| S | -0.010101 | 0.000000 | 1.970057  |
| C | 1.655087  | 0.000000 | 2.390305  |
| N | 2.763214  | 0.000000 | 2.730477  |

SH

|   |           |           |          |
|---|-----------|-----------|----------|
| S | 0.012212  | -0.020348 | 0.000518 |
| H | -0.105883 | -0.168878 | 1.329469 |

RFTS1a = CRBTS1b

|   |           |           |          |
|---|-----------|-----------|----------|
| H | 0.245712  | 0.227324  | 0.267208 |
| S | -0.056066 | 0.211235  | 1.574448 |
| S | 1.897264  | 0.134866  | 2.277410 |
| C | 2.206346  | 1.798721  | 2.504901 |
| O | 0.782022  | -2.491260 | 1.175960 |
| H | -0.004596 | -2.824616 | 1.632920 |
| N | 2.473324  | 2.913536  | 2.677987 |

FTS1a

|   |           |           |          |
|---|-----------|-----------|----------|
| H | 0.165985  | 0.110777  | 0.198621 |
| S | 0.053310  | -0.052497 | 1.526393 |
| S | 2.110946  | 0.022596  | 2.199458 |
| C | 2.159531  | 1.699705  | 2.485846 |
| O | 0.612350  | -1.863502 | 1.261290 |
| H | -0.093924 | -2.358175 | 1.692241 |
| N | 2.219082  | 2.840531  | 2.686317 |

CPFTS1a = CPFTS1b = CPBTS1b = CPBTS1a

|   |           |           |           |
|---|-----------|-----------|-----------|
| S | -0.384522 | -0.607065 | 0.669329  |
| S | -0.181304 | 0.213714  | 2.565290  |
| H | 0.844992  | -0.310058 | 0.228240  |
| C | -0.654727 | 1.829148  | 2.285787  |
| O | 0.446246  | -1.417617 | -2.231767 |
| H | -0.203389 | -1.693773 | -2.896035 |
| N | -0.964120 | 2.938175  | 2.149578  |

CRFTS1b = CRBTS1a = CRHTS3b = CRHTS3a

|   |           |           |          |
|---|-----------|-----------|----------|
| H | -0.052256 | 0.044931  | 0.757667 |
| S | 0.529132  | -0.788627 | 1.635470 |
| S | 2.446785  | -0.021077 | 1.432602 |
| C | 2.322391  | 1.382391  | 2.392074 |
| O | -0.293917 | 2.647849  | 0.984692 |
| H | 0.354114  | 2.972165  | 1.632500 |
| N | 2.242113  | 2.367022  | 3.000054 |

FTS1b

|   |           |           |          |
|---|-----------|-----------|----------|
| H | -0.030953 | -0.023965 | 0.124331 |
| S | 0.004014  | 0.030632  | 1.469848 |
| S | 2.114699  | -0.082203 | 2.003079 |
| C | 2.575442  | 1.500235  | 2.408662 |
| O | 0.119533  | 1.854412  | 1.136431 |
| H | -0.100423 | 2.268981  | 1.979657 |
| N | 2.921331  | 2.560338  | 2.731262 |

BT1b

|   |           |           |           |
|---|-----------|-----------|-----------|
| S | -0.190877 | -0.019742 | -0.051519 |
| S | -0.224769 | -0.039882 | 2.059197  |
| H | 1.123891  | 0.193128  | -0.162662 |
| C | -0.713668 | 1.562945  | 2.358482  |
| O | 0.253390  | -1.326681 | -1.803836 |

|   |           |           |           |
|---|-----------|-----------|-----------|
| H | -0.586130 | -1.804026 | -1.866457 |
| N | -1.046207 | 2.645961  | 2.607235  |

BTS3a

|   |           |           |           |
|---|-----------|-----------|-----------|
| S | -0.071553 | -0.193737 | -0.005702 |
| S | -0.219999 | -0.089934 | 2.089793  |
| C | -0.724187 | 1.524214  | 2.290756  |
| N | -1.066646 | 2.616537  | 2.474182  |
| H | 1.128727  | 0.389432  | -0.093255 |
| O | -0.322468 | 0.925060  | -1.953240 |
| H | -1.279964 | 1.065761  | -1.960122 |

CRFTS2a = CRBTS2b

|   |           |           |           |
|---|-----------|-----------|-----------|
| S | -0.673813 | 0.127267  | 1.750914  |
| S | 1.076175  | 0.699247  | 2.707117  |
| C | -0.061509 | -0.452115 | 0.268628  |
| H | 1.116174  | 1.949718  | 2.221910  |
| O | 1.252532  | -1.905886 | -3.441384 |
| H | 0.945091  | -1.567705 | -2.582474 |
| N | 0.300147  | -0.853318 | -0.755141 |

FTS2a

|   |           |           |           |
|---|-----------|-----------|-----------|
| C | 0.043853  | -0.032547 | 0.017438  |
| S | 0.012173  | -0.154716 | 1.708364  |
| S | 2.048832  | -0.012520 | 2.372070  |
| H | 2.017495  | 1.327638  | 2.310553  |
| O | 0.412497  | -1.957418 | 1.807117  |
| H | -0.456200 | -2.378443 | 1.800339  |
| N | 0.022241  | 0.134090  | -1.133175 |

CPFTS2a = CPFTS2b

|   |           |           |           |
|---|-----------|-----------|-----------|
| C | -0.763741 | -0.353137 | -0.508545 |
| S | -0.088789 | 0.037139  | 1.008724  |
| S | 2.106082  | 0.738208  | 4.010963  |
| H | 2.802733  | 0.402011  | 2.912865  |
| O | 0.904549  | -1.266255 | 1.234801  |
| H | 0.387294  | -1.962088 | 1.650492  |
| N | -1.252422 | -0.582448 | -1.535385 |

FTS2b

|   |           |           |           |
|---|-----------|-----------|-----------|
| C | 0.060760  | -0.021948 | -0.096799 |
| S | -0.165218 | 0.181963  | 1.569410  |
| S | 1.804181  | 0.023912  | 2.507583  |
| H | 2.187483  | 1.287596  | 2.273832  |
| O | 0.128304  | 1.969730  | 1.624691  |
| H | -0.721615 | 2.344735  | 1.360463  |
| N | 0.182482  | -0.237724 | -1.233182 |

BTS2b

|   |           |           |           |
|---|-----------|-----------|-----------|
| S | 0.049746  | -0.091326 | 0.005536  |
| S | -0.039449 | -0.030441 | 2.127096  |
| C | 1.742087  | 0.004304  | -0.164169 |
| H | -0.596377 | 1.190062  | 2.166625  |
| O | 0.079277  | -1.309998 | -1.687112 |
| H | -0.865814 | -1.489291 | -1.792618 |
| N | 2.889795  | 0.095139  | -0.286451 |

CPBTS2b = CPBTS2a

|   |           |           |           |
|---|-----------|-----------|-----------|
| S | -0.319453 | -0.488507 | -0.757156 |
| S | -0.888036 | 0.707589  | 2.566741  |
| C | 1.223019  | -0.421663 | -0.028819 |
| H | 0.407129  | 0.466952  | 2.831306  |
| O | 0.078819  | -1.135433 | -2.227172 |
| H | 0.336771  | -0.415564 | -2.809835 |
| N | 2.257652  | -0.356594 | 0.491576  |

BTS2a

|   |           |           |           |
|---|-----------|-----------|-----------|
| S | -0.083341 | 0.047924  | -0.081780 |
| S | 0.112520  | 0.340323  | 2.000515  |
| H | 1.081793  | -0.567713 | 2.192778  |
| C | -0.896211 | -1.453539 | -0.055962 |

|   |           |           |           |
|---|-----------|-----------|-----------|
| N | -1.435398 | -2.478819 | -0.052297 |
| O | 0.790279  | -0.402670 | -1.982614 |
| H | 1.382216  | -1.134022 | -1.754261 |

#### HTS3b

|   |          |           |           |
|---|----------|-----------|-----------|
| H | 0.329411 | -0.112916 | -0.283716 |
| S | 0.247443 | -0.142318 | 1.109769  |
| S | 2.267853 | -0.285263 | 1.488983  |
| C | 2.532347 | -1.963306 | 1.323051  |
| O | 0.389383 | 0.416705  | -1.698337 |
| H | 0.560571 | 1.361248  | -1.559582 |
| N | 2.770283 | -3.093183 | 1.221809  |

#### CPHTS3b = CPHTS3a

|   |           |           |           |
|---|-----------|-----------|-----------|
| H | -0.478647 | 1.142737  | -3.512506 |
| S | -0.391302 | 0.458341  | 2.381673  |
| S | -0.432088 | 0.750421  | 0.418859  |
| C | 0.198320  | -0.716160 | -0.216611 |
| O | -0.312435 | 0.689309  | -2.686398 |
| H | 0.050375  | -0.162314 | -2.935222 |
| N | 0.617335  | -1.685382 | -0.694307 |

#### HTS3a

|   |          |           |           |
|---|----------|-----------|-----------|
| H | 0.345541 | 0.363983  | -0.104330 |
| S | 0.078962 | -0.103281 | 1.188922  |
| S | 2.041917 | -0.216340 | 1.810301  |
| C | 2.455637 | -1.787343 | 1.287164  |
| O | 0.658500 | 0.290319  | -1.563887 |
| H | 0.864490 | -0.650391 | -1.685080 |
| N | 2.777842 | -2.840740 | 0.925265  |

## Reactions starting by HSSNO<sub>2</sub> + OH

### BH&HLYP/6-311+G(2df,2p) optimized geometries

#### HSSNO<sub>2</sub>

|   |          |           |          |
|---|----------|-----------|----------|
| H | 0.035665 | 0.079097  | 0.026958 |
| S | 0.018868 | -0.043252 | 1.356977 |
| S | 1.995687 | 0.025695  | 1.694136 |
| N | 2.348389 | 1.803314  | 1.859273 |
| O | 1.490772 | 2.600499  | 1.679151 |
| O | 3.491087 | 1.998648  | 2.142232 |

#### HOSNO<sub>2</sub>

|   |           |           |           |
|---|-----------|-----------|-----------|
| S | -0.001401 | 0.003526  | -0.000091 |
| O | -0.000081 | -0.005102 | 1.600279  |
| H | 0.888738  | 0.000795  | 1.948279  |
| N | 0.264722  | 1.726840  | -0.337537 |
| O | 0.509511  | 2.463838  | 0.562042  |
| O | 0.188124  | 1.980986  | -1.503624 |

#### NO<sub>2</sub>

|   |           |          |           |
|---|-----------|----------|-----------|
| N | 0.017130  | 0.000000 | 0.004656  |
| O | -0.002876 | 0.000000 | 1.174918  |
| O | 0.853051  | 0.000000 | -0.815004 |

#### SNO<sub>2</sub>

|   |           |           |          |
|---|-----------|-----------|----------|
| S | 0.016439  | 0.000651  | 0.039979 |
| N | -0.002173 | -0.002701 | 1.780711 |
| O | 1.063020  | 0.001009  | 2.316744 |
| O | -1.078403 | -0.006516 | 2.294141 |

#### HSNO<sub>2</sub>

|   |           |           |           |
|---|-----------|-----------|-----------|
| N | 0.075548  | 0.088662  | -0.044991 |
| S | 0.312549  | 0.579514  | 1.702225  |
| O | 0.946165  | 0.386103  | -0.797651 |
| O | -0.938604 | -0.476657 | -0.299613 |

H 0.914632 -0.577786 1.973613

OSNO2

N 0.049658 -0.073759 -0.029591  
S 0.333160 -0.600510 1.758317  
O 1.004070 0.532052 2.375328  
O -0.976692 0.486351 -0.245906  
O 0.921315 -0.344628 -0.791683

CRBTS1b

S -0.694353 -0.386965 0.690306  
S -0.596039 0.170738 2.616528  
H 0.608586 -0.531149 0.447350  
N -0.422687 1.979362 2.543044  
O -0.318213 2.527528 1.497134  
O -0.423009 2.467938 3.632545  
O 0.355119 -1.239029 -2.116878  
H -0.213202 -1.159568 -2.888843

BTS1b

S -0.078572 0.082131 0.045358  
S -0.090406 0.056487 2.132971  
H 1.239195 0.168185 -0.072253  
N -0.611700 1.735973 2.571661  
O -0.800699 2.537422 1.717552  
O -0.720377 1.878555 3.750342  
O 0.070147 -1.056315 -1.579597  
H -0.831266 -1.319556 -1.763063

CPBTS1b

S 0.330500 -0.219367 -0.704882  
H -0.522413 0.490293 0.034116  
O 1.537023 -0.369725 0.392708  
H 2.227866 0.257247 0.200291  
S -1.312609 -2.468566 -0.283683  
N -2.417092 -1.589891 -1.320545  
O -2.123513 -0.477477 -1.686739  
O -3.424641 -2.163560 -1.601054

CRBTS1a = CRFTS1b = CRHTS3b = CRHTS3a

S -0.106795 -0.732095 0.560151  
S 0.848056 0.098904 2.116540  
H 0.773494 -0.432047 -0.400415  
N 0.305911 1.831179 2.110410  
O -0.360648 2.255682 1.217334  
O 0.705943 2.427040 3.059286  
O 0.312825 1.603558 -1.598268  
H -0.007005 2.113931 -0.845059

BTS1a

S 0.040317 -0.061990 0.100623  
S 0.216783 0.027259 2.164790  
H 1.337186 0.070125 -0.154918  
N 0.485926 1.792687 2.431782  
O 0.595971 2.520166 1.496636  
O 0.543758 2.077375 3.587256  
O -0.363421 0.880412 -1.652914  
H -0.298040 1.808674 -1.424163

CPBTS1a

S 0.180466 -0.317784 -0.555900  
S 0.176363 0.154560 2.303280  
H 1.513050 -0.186350 -0.619301  
N 0.308062 1.889007 2.330661  
O 0.273095 2.494884 1.277445  
O 0.424752 2.402767 3.396185  
O -0.280372 1.157221 -0.993802  
H -0.152607 1.762640 -0.246004

FTS1b

H 1.188212 0.192050 0.074825

|   |           |          |          |
|---|-----------|----------|----------|
| S | 0.114041  | 0.245337 | 0.893631 |
| S | 1.501103  | 0.336890 | 2.552172 |
| N | 2.636185  | 1.647219 | 2.109059 |
| O | -0.473826 | 1.819316 | 1.517225 |
| H | -1.103175 | 2.123503 | 0.863675 |
| O | 3.404247  | 1.925007 | 2.978416 |
| O | 2.586790  | 2.108628 | 1.011661 |

#### CPFTS1b

|   |           |          |          |
|---|-----------|----------|----------|
| H | 0.682499  | 2.254944 | 0.433430 |
| S | 0.314138  | 1.015090 | 0.756196 |
| S | 1.616579  | 1.363275 | 3.229690 |
| N | 3.056146  | 1.317532 | 2.233337 |
| O | -1.268204 | 1.304376 | 1.066036 |
| H | -1.796965 | 1.035575 | 0.320658 |
| O | 4.091600  | 1.356932 | 2.824101 |
| O | 2.940630  | 1.258146 | 1.032813 |

#### CRFTS1a

|   |           |           |          |
|---|-----------|-----------|----------|
| H | 0.135588  | 0.181755  | 0.158686 |
| S | -0.118282 | 0.165581  | 1.469446 |
| S | 1.776414  | 0.105426  | 2.147611 |
| N | 2.199470  | 1.859952  | 2.339670 |
| O | 0.692683  | -2.583690 | 1.202497 |
| H | -0.073559 | -2.886967 | 1.697102 |
| O | 3.284364  | 1.995752  | 2.819505 |
| O | 1.441574  | 2.704694  | 1.996479 |

#### FTS1a

|   |           |           |          |
|---|-----------|-----------|----------|
| H | 0.042667  | 0.023151  | 0.107570 |
| S | -0.032284 | -0.097028 | 1.435941 |
| S | 1.999557  | -0.027609 | 2.127747 |
| N | 2.155430  | 1.744478  | 2.330442 |
| O | 0.505390  | -1.859770 | 1.232086 |
| H | -0.126655 | -2.368422 | 1.736330 |
| O | 3.197239  | 2.057678  | 2.821854 |
| O | 1.279842  | 2.471860  | 1.976230 |

#### CPFTS1a

|   |           |           |          |
|---|-----------|-----------|----------|
| H | 0.411979  | 0.194969  | 0.341009 |
| S | 0.057575  | -0.333529 | 1.512424 |
| S | 2.694844  | 0.087710  | 2.402700 |
| N | 2.220882  | 1.772618  | 2.337928 |
| O | 0.017994  | -1.909171 | 1.066765 |
| H | -0.883053 | -2.179460 | 0.916827 |
| O | 3.036141  | 2.550744  | 2.728869 |
| O | 1.130638  | 2.062724  | 1.908029 |

#### CRBTS2a

|   |           |           |           |
|---|-----------|-----------|-----------|
| S | 0.126785  | -0.135265 | 0.687309  |
| S | 0.535591  | 0.565499  | 2.520709  |
| N | 1.764398  | -0.271001 | -0.088900 |
| H | 0.510275  | 1.872463  | 2.245404  |
| O | -0.806246 | -1.598114 | -2.591887 |
| H | 0.080191  | -1.393874 | -2.271040 |
| O | 1.705194  | -0.757738 | -1.185380 |
| O | 2.731093  | 0.106016  | 0.475371  |

#### BTS2a

|   |           |           |           |
|---|-----------|-----------|-----------|
| S | 0.118744  | 0.093285  | -0.062634 |
| S | 0.175885  | 0.183627  | 2.040577  |
| N | 1.955174  | -0.047896 | -0.348009 |
| H | -0.190945 | 1.466799  | 2.079520  |
| O | 0.038333  | -1.103892 | -1.557718 |
| H | -0.867587 | -1.410586 | -1.549287 |
| O | 2.299001  | 0.343129  | -1.410112 |
| O | 2.613161  | -0.493041 | 0.529101  |

#### CPBTS2a = CPBTS2b

|   |           |           |           |
|---|-----------|-----------|-----------|
| S | -0.117977 | -0.386206 | -0.688152 |
| S | -0.781143 | 0.660526  | 3.282869  |

|   |           |           |           |
|---|-----------|-----------|-----------|
| N | 1.618960  | -0.399813 | -0.318143 |
| H | 0.386789  | 0.362544  | 2.707159  |
| O | -0.104403 | -0.855076 | -2.217305 |
| H | 0.094193  | -0.128784 | -2.804203 |
| O | 2.399008  | -0.587873 | -1.192899 |
| O | 1.849268  | -0.184630 | 0.839084  |

#### CRBTS2b

|   |           |           |           |
|---|-----------|-----------|-----------|
| S | 0.109945  | -0.521448 | 0.203801  |
| S | -0.040995 | 0.331134  | 2.010599  |
| N | 1.844517  | -0.242302 | -0.277470 |
| H | -0.328398 | 1.568650  | 1.595994  |
| O | -0.340314 | 2.090255  | -0.796784 |
| H | -0.571854 | 1.883688  | -1.706325 |
| O | 2.073154  | -0.692603 | -1.360353 |
| O | 2.583090  | 0.323042  | 0.452558  |

#### BTS2b

|   |           |           |           |
|---|-----------|-----------|-----------|
| S | -0.069858 | 0.043106  | -0.011605 |
| S | -0.164594 | -0.080680 | 2.055032  |
| N | 1.778459  | -0.032019 | -0.222831 |
| H | 0.208694  | 1.168746  | 2.334695  |
| O | -0.168648 | 1.163698  | -1.639830 |
| H | -0.045258 | 2.065252  | -1.343101 |
| O | 2.126703  | -0.504207 | -1.250216 |
| O | 2.448640  | 0.397305  | 0.658786  |

#### HTS3a

|   |           |           |           |
|---|-----------|-----------|-----------|
| S | -0.092140 | 0.055823  | 0.078132  |
| S | -0.349812 | -0.427938 | 1.993995  |
| N | 1.709490  | 0.275763  | -0.056856 |
| O | 2.078067  | 0.372802  | -1.184515 |
| O | 2.364328  | 0.355248  | 0.934623  |
| H | -0.271305 | 0.867496  | 2.550478  |
| O | 0.495792  | 1.998020  | 3.011676  |
| H | 1.388147  | 1.769038  | 2.730961  |

#### HTS3b

|   |           |           |           |
|---|-----------|-----------|-----------|
| S | 0.042273  | -0.015012 | -0.059549 |
| S | 0.043203  | 0.188690  | 1.921308  |
| N | 1.812157  | -0.132415 | -0.491816 |
| O | 1.965246  | -0.315431 | -1.660704 |
| O | 2.635882  | -0.023224 | 0.350665  |
| H | 0.207251  | 1.571983  | 2.009312  |
| O | -0.046390 | 3.039038  | 2.157930  |
| H | -0.999719 | 3.126373  | 2.074186  |

#### CPHTS3a = CPHTS3b

|   |           |           |           |
|---|-----------|-----------|-----------|
| S | -0.931541 | -0.731389 | -0.264812 |
| S | -0.871938 | -1.473208 | 1.487856  |
| N | 0.674331  | 0.192058  | -0.478661 |
| O | 0.750268  | 0.711973  | -1.546865 |
| O | 1.463536  | 0.192278  | 0.402684  |
| H | 0.367999  | 2.352004  | 1.520626  |
| O | -0.499700 | 2.357427  | 1.132664  |
| H | -0.637239 | 3.239221  | 0.808636  |

#### CRHTS5a

|   |           |           |           |
|---|-----------|-----------|-----------|
| H | -1.752262 | 1.216864  | -0.387117 |
| S | -1.141685 | 2.371958  | -0.737553 |
| O | 0.311174  | 2.037362  | -0.632268 |
| H | 1.133444  | 0.259045  | -0.085361 |
| S | 1.579473  | -0.949118 | 0.286297  |
| N | -0.039828 | -1.615478 | 0.483693  |
| O | -0.077253 | -2.754681 | 0.832157  |
| O | -0.983506 | -0.908285 | 0.263582  |

#### HTS5a

|   |           |           |          |
|---|-----------|-----------|----------|
| H | -0.397028 | -0.420388 | 0.679435 |
| S | 0.314699  | 0.388735  | 1.477339 |



|   |          |           |          |
|---|----------|-----------|----------|
| O | 1.778533 | -0.027335 | 1.081365 |
| H | 2.125359 | -0.898446 | 1.515451 |
| S | 2.800606 | -2.418564 | 2.345975 |
| N | 1.265137 | -3.229290 | 2.377323 |
| O | 1.233601 | -4.337848 | 2.811193 |
| O | 0.313694 | -2.613935 | 1.959010 |

#### CPHTS5a

|   |           |           |           |
|---|-----------|-----------|-----------|
| H | -0.755412 | 3.023945  | -2.127448 |
| S | -0.973560 | 2.988584  | -0.808941 |
| O | -0.313342 | 1.511615  | -0.492286 |
| H | -0.978352 | 0.829223  | -0.543498 |
| S | 1.486377  | -0.643876 | 0.492816  |
| N | 0.140799  | -1.722936 | 0.266715  |
| O | 0.345876  | -2.865012 | 0.538663  |
| O | -0.886703 | -1.257240 | -0.140574 |

#### CRHTS6a

|   |           |           |           |
|---|-----------|-----------|-----------|
| N | -1.049559 | 0.263724  | -1.062770 |
| S | -1.151898 | 0.211984  | 0.689910  |
| O | 0.023822  | 0.123706  | -1.597602 |
| O | -2.083397 | 0.435857  | -1.630323 |
| H | 1.425527  | -1.253825 | -0.044555 |
| S | 1.602509  | -0.050680 | 0.503818  |
| O | 2.110216  | -0.505369 | 1.985147  |
| H | 1.373634  | -0.762108 | 2.533933  |

#### HTS6a

|   |           |           |           |
|---|-----------|-----------|-----------|
| N | 0.078320  | 0.108577  | 0.062880  |
| S | -0.085061 | -0.325490 | 1.761129  |
| O | 1.171809  | 0.091971  | -0.427493 |
| O | -0.942514 | 0.389316  | -0.485200 |
| H | 1.576214  | -0.722012 | 1.805834  |
| S | 3.033440  | -0.462687 | 1.757280  |
| O | 3.388799  | -0.829065 | 3.301019  |
| H | 3.573534  | -0.031894 | 3.789178  |

#### CPHTS6a

|   |           |           |           |
|---|-----------|-----------|-----------|
| N | -1.291001 | 0.293259  | -1.337963 |
| S | -1.932794 | -0.384233 | 0.162770  |
| O | -0.121500 | 0.537121  | -1.401491 |
| O | -2.102657 | 0.458383  | -2.195449 |
| H | -0.738394 | -0.384112 | 0.769101  |
| S | 1.843239  | 0.018181  | 0.963316  |
| O | 2.486767  | -0.395160 | 2.387081  |
| H | 3.424793  | -0.222928 | 2.387879  |

#### CRHTS8a = CRHTS8b

|   |           |           |           |
|---|-----------|-----------|-----------|
| N | -0.846046 | 0.277141  | -0.892661 |
| S | -0.762146 | 1.233773  | 0.599988  |
| O | 0.802909  | 1.246571  | 0.888309  |
| H | 1.087922  | 0.415841  | 1.290802  |
| S | 1.660902  | -1.816141 | 1.704196  |
| H | 1.443233  | -2.001222 | 0.398374  |
| O | -1.945726 | 0.240212  | -1.360985 |
| O | 0.137026  | -0.263427 | -1.296628 |

#### HTS8a

|   |           |           |           |
|---|-----------|-----------|-----------|
| N | 0.016566  | 0.010182  | -0.049918 |
| S | 0.009843  | -0.060653 | 1.754534  |
| O | 1.498710  | 0.002327  | 2.096383  |
| H | 2.015936  | -1.047116 | 2.070262  |
| S | 2.678563  | -2.502922 | 2.085521  |
| H | 2.545472  | -2.649862 | 3.404435  |
| O | -1.087152 | 0.069165  | -0.502413 |
| O | 1.056392  | -0.011933 | -0.615025 |

#### HTS8b

|   |          |           |          |
|---|----------|-----------|----------|
| N | 0.004874 | -0.016164 | 0.004634 |
| S | 0.011173 | 0.024888  | 1.809292 |
| O | 1.504507 | -0.000465 | 2.132942 |

|   |           |           |           |
|---|-----------|-----------|-----------|
| H | 1.937886  | -1.089701 | 2.195406  |
| S | 2.511413  | -2.577347 | 2.194048  |
| H | 2.776670  | -2.548853 | 0.887202  |
| O | -1.092295 | 0.107884  | -0.449583 |
| O | 1.034596  | -0.167459 | -0.562012 |

CPHTS8a = CPHTS8b

|   |           |           |           |
|---|-----------|-----------|-----------|
| N | -0.304138 | 0.595621  | -0.768088 |
| S | -1.282575 | 0.901560  | 0.766905  |
| O | -0.476086 | 1.802133  | 1.570440  |
| H | 1.360253  | -2.456814 | -0.037111 |
| S | 1.333770  | -1.931953 | 1.186065  |
| H | 2.279085  | -1.038077 | 0.903613  |
| O | -0.869275 | -0.134964 | -1.525379 |
| O | 0.751003  | 1.117667  | -0.877684 |

### QCISD/6-311+G(2df,2p) optimized geometries

HSSNO2

|   |          |           |          |
|---|----------|-----------|----------|
| H | 0.039267 | 0.084671  | 0.023521 |
| S | 0.008833 | -0.042807 | 1.360418 |
| S | 2.002947 | 0.009098  | 1.697066 |
| N | 2.348120 | 1.802822  | 1.858633 |
| O | 1.474862 | 2.606730  | 1.674897 |
| O | 3.506439 | 2.003487  | 2.144191 |

HOSNO2

|   |           |           |           |
|---|-----------|-----------|-----------|
| S | 0.000353  | -0.011582 | -0.004072 |
| O | -0.010063 | -0.005586 | 1.616485  |
| H | 0.894949  | -0.002042 | 1.943651  |
| N | 0.264837  | 1.729725  | -0.339401 |
| O | 0.511999  | 2.474509  | 0.574074  |
| O | 0.187537  | 1.985860  | -1.521388 |

NO2

|   |           |          |           |
|---|-----------|----------|-----------|
| N | 0.010051  | 0.000000 | 0.001670  |
| O | -0.005462 | 0.000000 | 1.190618  |
| O | 0.862716  | 0.000000 | -0.827717 |

SNO2

|   |           |           |          |
|---|-----------|-----------|----------|
| S | 0.016604  | 0.000483  | 0.029573 |
| N | -0.002174 | -0.001902 | 1.775729 |
| O | 1.076807  | 0.000743  | 2.324537 |
| O | -1.092354 | -0.006880 | 2.301737 |

CRBTS1b

|   |           |           |           |
|---|-----------|-----------|-----------|
| S | -0.728743 | -0.429677 | 0.741783  |
| S | -0.578692 | 0.163138  | 2.670680  |
| H | 0.578703  | -0.559117 | 0.473479  |
| N | -0.419530 | 1.983805  | 2.534407  |
| O | -0.345932 | 2.507439  | 1.455184  |
| O | -0.393211 | 2.509448  | 3.624498  |
| O | 0.363685  | -1.234651 | -2.142983 |
| H | -0.180077 | -1.111530 | -2.935863 |

BTS1b

|   |           |           |           |
|---|-----------|-----------|-----------|
| S | -0.138053 | 0.116378  | 0.042604  |
| S | -0.161884 | 0.024938  | 2.119599  |
| H | 1.184237  | 0.255415  | -0.080683 |
| N | -0.593270 | 1.742998  | 2.587925  |
| O | -0.718739 | 2.582167  | 1.736564  |
| O | -0.712097 | 1.864189  | 3.784338  |
| O | 0.111418  | -1.099015 | -1.623986 |
| H | -0.795290 | -1.404188 | -1.763391 |

CPBTS1a = CPFTS1b = CPFTS1a

|   |          |          |          |
|---|----------|----------|----------|
| S | 0.394959 | 0.039143 | 0.017066 |
| S | 0.417799 | 0.185233 | 2.375256 |

|   |           |           |           |
|---|-----------|-----------|-----------|
| H | 1.159694  | -1.043121 | 0.197265  |
| N | -0.685480 | 1.601169  | 2.393076  |
| O | -1.240368 | 1.942646  | 1.369525  |
| O | -0.795326 | 2.123948  | 3.477584  |
| O | -0.321618 | -0.689633 | -1.348614 |
| H | -0.935007 | -0.040832 | -1.710284 |

CRBTS1a = CRFTS1b = CRHTS3b = CRHTS3a

|   |           |           |           |
|---|-----------|-----------|-----------|
| S | -0.123175 | -0.756146 | 0.582095  |
| S | 0.891182  | 0.097325  | 2.109592  |
| H | 0.731112  | -0.440916 | -0.406764 |
| N | 0.300151  | 1.828328  | 2.106857  |
| O | -0.432477 | 2.227779  | 1.232720  |
| O | 0.739302  | 2.452767  | 3.040786  |
| O | 0.360599  | 1.623684  | -1.595866 |
| H | 0.005087  | 2.133331  | -0.849443 |

BTS1a

|   |           |           |           |
|---|-----------|-----------|-----------|
| S | 0.051080  | -0.133660 | 0.122183  |
| S | 0.256072  | -0.004838 | 2.175295  |
| H | 1.352317  | -0.008901 | -0.161707 |
| N | 0.464699  | 1.798297  | 2.380470  |
| O | 0.539673  | 2.506992  | 1.407822  |
| O | 0.525329  | 2.121766  | 3.541790  |
| O | -0.379047 | 0.969915  | -1.631568 |
| H | -0.251644 | 1.865137  | -1.285193 |

CPBTS1a

|   |           |           |           |
|---|-----------|-----------|-----------|
| S | 0.190989  | -0.340292 | -0.562351 |
| S | 0.136497  | 0.155377  | 2.315934  |
| H | 1.527175  | -0.183678 | -0.658737 |
| N | 0.314642  | 1.903634  | 2.347659  |
| O | 0.309734  | 2.518026  | 1.284046  |
| O | 0.431519  | 2.410473  | 3.434296  |
| O | -0.301803 | 1.150225  | -1.014513 |
| H | -0.165944 | 1.743181  | -0.253769 |

FTS1b

|   |           |          |          |
|---|-----------|----------|----------|
| H | 1.180224  | 0.216490 | 0.062648 |
| S | 0.108182  | 0.217911 | 0.893082 |
| S | 1.508350  | 0.288307 | 2.557834 |
| N | 2.613489  | 1.644923 | 2.102525 |
| O | -0.429217 | 1.836477 | 1.540097 |
| H | -1.059281 | 2.138527 | 0.872685 |
| O | 3.359268  | 1.975102 | 2.994596 |
| O | 2.572563  | 2.080212 | 0.977197 |

CRFTS1a

|   |           |           |          |
|---|-----------|-----------|----------|
| H | 0.150926  | 0.087849  | 0.295056 |
| S | -0.165700 | 0.266657  | 1.588010 |
| S | 1.709056  | 0.186156  | 2.350748 |
| N | 2.233313  | 1.945331  | 2.315666 |
| O | 0.678872  | -2.720626 | 1.104393 |
| H | -0.113166 | -3.080887 | 1.531788 |
| O | 3.321541  | 2.081348  | 2.815067 |
| O | 1.523410  | 2.776674  | 1.830269 |

FTS1a

|   |           |           |          |
|---|-----------|-----------|----------|
| H | 0.050939  | 0.038786  | 0.110772 |
| S | -0.023181 | -0.099395 | 1.445762 |
| S | 2.023243  | -0.049755 | 2.134566 |
| N | 2.154446  | 1.744118  | 2.329333 |
| O | 0.500409  | -1.873225 | 1.215924 |
| H | -0.145314 | -2.359934 | 1.741525 |
| O | 3.205687  | 2.078676  | 2.824936 |
| O | 1.254957  | 2.465068  | 1.965382 |

CRBTS2a

|   |          |           |           |
|---|----------|-----------|-----------|
| S | 0.118189 | -0.137789 | 0.653537  |
| S | 0.514719 | 0.551458  | 2.512169  |
| N | 1.787801 | -0.267242 | -0.089459 |

|   |           |           |           |
|---|-----------|-----------|-----------|
| H | 0.501312  | 1.865143  | 2.231333  |
| O | -0.840872 | -1.591881 | -2.557447 |
| H | 0.061942  | -1.390867 | -2.260855 |
| O | 1.750190  | -0.754087 | -1.204542 |
| O | 2.754000  | 0.113252  | 0.506849  |

#### BTS2a

|   |           |           |           |
|---|-----------|-----------|-----------|
| S | 0.077194  | 0.124173  | -0.085653 |
| S | 0.068416  | 0.141525  | 2.010173  |
| N | 1.935260  | -0.020566 | -0.337803 |
| H | -0.018866 | 1.479264  | 2.112650  |
| O | 0.063473  | -1.172451 | -1.559614 |
| H | -0.867450 | -1.431137 | -1.568653 |
| O | 2.292053  | 0.368988  | -1.415530 |
| O | 2.591686  | -0.458373 | 0.565868  |

#### CPBTS2a = CPBTS2b

|   |           |           |           |
|---|-----------|-----------|-----------|
| S | 0.000188  | 0.662414  | -0.418311 |
| S | -0.193683 | 0.565325  | 3.587508  |
| N | 1.709878  | 0.122350  | -0.364898 |
| H | 0.860579  | 0.177232  | 2.850155  |
| O | -0.243921 | 0.686750  | -2.019862 |
| H | 0.099970  | 1.507965  | -2.385543 |
| O | 2.334984  | 0.038350  | -1.388872 |
| O | 2.094691  | -0.095292 | 0.767156  |

#### CRBTS2b

|   |           |           |           |
|---|-----------|-----------|-----------|
| S | 0.117738  | -0.643812 | 0.296302  |
| S | -0.006295 | 0.317762  | 2.069289  |
| N | 1.814149  | -0.232143 | -0.283472 |
| H | -0.401052 | 1.507150  | 1.583919  |
| O | -0.227654 | 2.131570  | -0.834957 |
| H | -0.532021 | 1.942316  | -1.735714 |
| O | 2.026368  | -0.710721 | -1.371023 |
| O | 2.537912  | 0.428295  | 0.397676  |

#### BTS2b

|   |           |           |           |
|---|-----------|-----------|-----------|
| S | -0.059327 | -0.014394 | 0.000176  |
| S | -0.149375 | -0.075639 | 2.063593  |
| N | 1.792542  | -0.061057 | -0.222024 |
| H | 0.164617  | 1.209860  | 2.289218  |
| O | -0.152757 | 1.213474  | -1.669078 |
| H | -0.093556 | 2.095135  | -1.276112 |
| O | 2.139479  | -0.551485 | -1.261169 |
| O | 2.472514  | 0.405308  | 0.656326  |

#### CRFTS10b

|   |           |           |           |
|---|-----------|-----------|-----------|
| N | 0.313806  | -0.387020 | 1.205566  |
| S | 0.222406  | 1.375073  | 1.676559  |
| S | 2.096135  | 1.758398  | 2.331865  |
| H | 2.642225  | 2.091565  | 1.150449  |
| O | -0.977086 | -3.670806 | -0.173177 |
| H | -0.881003 | -2.769531 | 0.176316  |
| O | -0.773509 | -0.807216 | 0.855960  |
| O | 1.351231  | -0.985504 | 1.250032  |

#### FTS10b

|   |           |           |           |
|---|-----------|-----------|-----------|
| N | 0.004738  | -0.030775 | -0.141658 |
| S | 0.035730  | -0.040090 | 1.771113  |
| S | 1.971182  | 0.006577  | 2.420354  |
| H | 2.082502  | 1.341999  | 2.322776  |
| O | 0.309563  | -1.876672 | 1.483002  |
| H | -0.461489 | -2.268759 | 1.909172  |
| O | -1.122279 | 0.005698  | -0.575958 |
| O | 1.047166  | 0.024947  | -0.732249 |

#### CPFTS10b

|   |           |           |           |
|---|-----------|-----------|-----------|
| N | -0.372358 | 0.101547  | -0.843560 |
| S | 0.474922  | -0.332875 | 2.950886  |
| S | 2.392163  | -0.362340 | 2.241193  |
| H | 2.321298  | 0.706892  | 1.429988  |

|   |           |           |           |
|---|-----------|-----------|-----------|
| O | -0.422631 | -1.133957 | 1.797930  |
| H | -0.356558 | -2.076518 | 1.973232  |
| O | -0.109735 | -0.932200 | -1.366667 |
| O | 0.264897  | 1.000084  | -0.393393 |

#### CRFTS10a

|   |           |           |           |
|---|-----------|-----------|-----------|
| N | 0.070765  | -0.236176 | -0.105075 |
| S | -0.037851 | -0.296961 | 1.730141  |
| S | 1.882315  | -0.052558 | 2.310677  |
| H | 1.887587  | 1.291296  | 2.299508  |
| O | 0.119524  | 2.663373  | 1.169478  |
| H | -0.816698 | 2.914581  | 1.154680  |
| O | -1.023869 | -0.327725 | -0.605335 |
| O | 1.130826  | -0.119601 | -0.640488 |

#### FTS10a

|   |           |           |           |
|---|-----------|-----------|-----------|
| N | 0.085634  | -0.090628 | -0.168513 |
| S | -0.093147 | 0.210853  | 1.743849  |
| S | 1.811459  | -0.045644 | 2.378983  |
| H | 2.082118  | 1.270352  | 2.464667  |
| O | -0.034937 | 1.984053  | 1.096259  |
| H | -0.625662 | 2.439227  | 1.708554  |
| O | -0.988324 | -0.190313 | -0.705470 |
| O | 1.183657  | -0.225856 | -0.631395 |

#### CPFTS10a

|   |           |           |           |
|---|-----------|-----------|-----------|
| N | -0.008262 | 0.020951  | -1.022662 |
| S | 0.174554  | 0.093307  | 2.893214  |
| S | 2.081503  | 0.460972  | 2.251016  |
| H | 2.267540  | 1.659903  | 2.830377  |
| O | -0.806975 | 0.720923  | 1.702884  |
| H | -0.955093 | 1.649511  | 1.900327  |
| O | 0.316619  | 1.141075  | -1.258887 |
| O | 0.557378  | -0.953656 | -0.645328 |

#### HTS3b

|   |           |           |           |
|---|-----------|-----------|-----------|
| S | 0.012951  | -0.000792 | -0.047643 |
| S | 0.044509  | 0.159762  | 1.956088  |
| N | 1.795938  | -0.109902 | -0.483000 |
| O | 1.948486  | -0.272391 | -1.671882 |
| O | 2.630495  | -0.013239 | 0.373568  |
| H | 0.234108  | 1.537802  | 2.045863  |
| O | -0.029745 | 3.041149  | 2.165233  |
| H | -0.976838 | 3.097613  | 1.963104  |

#### CPHTS3b = CPHTS3a

|   |           |           |           |
|---|-----------|-----------|-----------|
| S | -0.913364 | -0.744161 | -0.287090 |
| S | -0.915082 | -1.330446 | 1.543862  |
| N | 0.711351  | 0.175365  | -0.499250 |
| O | 0.834229  | 0.626610  | -1.611741 |
| O | 1.472070  | 0.239682  | 0.427731  |
| H | 0.355470  | 2.296430  | 1.461674  |
| O | -0.520214 | 2.323143  | 1.073499  |
| H | -0.708743 | 3.253742  | 0.953444  |

#### HTS3a

|   |           |           |           |
|---|-----------|-----------|-----------|
| S | -0.109835 | 0.057997  | 0.084113  |
| S | -0.363717 | -0.443615 | 2.015035  |
| N | 1.703893  | 0.299610  | -0.027384 |
| O | 2.088684  | 0.399964  | -1.166084 |
| O | 2.355876  | 0.389189  | 0.985999  |
| H | -0.297784 | 0.858115  | 2.554080  |
| O | 0.541628  | 1.994096  | 2.980956  |
| H | 1.403822  | 1.710895  | 2.631777  |
